# Supplementary material
Source: publisher figshare collection journal article supplement (https://acs.figshare.com/ndownloader/files/22762325)
Supplement: Supplementary file 1 [file 22762325]

## Sheet: Table S1
Table S1. The primers, adaptors and probes in this study
Primers used for expression analysis of miRNA target genes through qRT-PCR
gene	ID	Sequence of forward primer (5'-3')	Sequence of reverse primer (5'-3')
ABCF3	TEA024504.1	GGATAAGGTGTTGTTTAAGAAG	AAGCAGAACTTCACCTTGAC
ARF	TEA029643.1	TCTCGTTTCAGCAGCTAC	CCAAGGAGAAGCACATCG
C2H2-GATA	TEA024795.1	GCTGCTTGGGCTCTCAC	GGCCAAGGACAAGATCAC
GRAS1	TEA013558.1	GAGCTGGTTCGAGCTGC	ATGATCAGAGACTGAAGAGC
GRF1	TEA000848.1	ACTGTGAGCGCCATATGC	TGTTACCAAAGGAGTGCAG
GRF10	TEA027740.1	AGATGCTGTTGCTGATCAG	TGATGTGGAACCAGCAATC
GRF13	TEA033522.1	AAGTACTGCGAGCGACAC	CATGAGGTGAAAGAGTCTG
GRF4	TEA014228.1	CTCGAGAGATGCTGTTGC	TGCTGGTGTTGGACAAGC
GRF9	TEA026508.1	TGTGAGCGGCACATGAAC	GATGCAGTTGTAGAGGAAG
HD-ZIP1	TEA000705.1	TTGTCTATTGCTGAGGAGAC	ACTCTTGTAGGTTCTAGACC
HD-ZIP4	TEA008271.1	CACTGGAACTGCTGTTGAG	CCACTCTTGTAGGTTCTAG
NAC	TEA000258.1	CAGAGCTGTTCCTACGAC	TCTACCACTGTGTTGAGTG
NF-YA	TEA023550.1	GTGTTGGTTGAGGTAGAATC	CCAAGAATGAGTTGCCATTC
SBP3	TEA006584.1	CACTCAAGGTCTCTCTTCC	CTGAGGCATGGTCGTAAG
	Primers used to amplify cleavage products of tea miRNA target genes through 5' RLM-RACE
	5'RACE ADAPTER_RNAadpt	GCGUGACCACUAGUCACGUCUGAGUUCGUCGCCAUUCCACAAA
	RACE outer primer	ACTAGTCACGTCTGAGTTCG
	RACE inner primer	ACGTCTGAGTTCGTCGCCATTCCAC
Gene specific reverse primers used for 5' RLM-RACE
gene	ID	Reverse outer primer (5'-3')	Reverse inner primer (5'-3')
ARF	TEA029643.1	CAGAATAACTGCATAGATAGAACC	TAGTCGTTCTCAATAGTCATGG
GRF1	TEA000848.1	CTGTAATCTTTGCGAGGAATCC	CATATGGAATGGATTCGAGGTG
GRF13	TEA033522.1	CTAGGAGTCTCCAGATCAGG	GATTCAGAGACTCGTCGATGC
GRF4	TEA014228.1	GTGGAGCGATCAGATTGG	GTCCTTAGGCCAGTCATC
HD-ZIP3	TEA004692.1	ACTGGTGGCATGCTTGGAC	GCGTAACAAGCAGAAATCACG
HD-ZIP4	TEA008271.1	GAAATCACGAGCAGGAGCC	GTAGTTGGTGCATAGAGCTG
NF-YA	TEA023550.1	CAAGTCACACTAATAAGCTAG	CACATATCTACTTGACATCC
SBP3	TEA006584.1	TCAACATTGCTTCAAGTTGTAC	TAAACCTAACCTCCATAACTTC
Primer sequences used for tailing qRT-PCR analysis
miRNA		Forward primer (5′ to 3′)	Reverse primer (5′ to 3′)
miR396b		GCCTTCCACAGCTTTCTTGAACTG	miRcute miRNA qPCR Detection Kit (Code No. FP411, TIANGEN, Beijing, China) provided
miR169a		GCCAAGGATGATTTGCCTGC
miR164a		TGGAGAAGCAGGGCACGTGCA
miR171b		TGATTGAGCCGTGCCAATATCT
miR171d		TTGAGCCGCGTCAATATCTCT
miR398		TGTGTTCTCAGGTCGCCCCTG
miR396a		CGCTTCCACAGCTTTCTTGAACCA
miR396d		GCGGTTCCACAGCTTTCTTGAACTT
miR166a		TCGGACCAGGCTTCATTCCCT
PC-3p-15743_350		CGGTACTCTTTCCTGCGACC
miR167d		GCGTGAAGCTGTCAGCCTGATC
miR222		TTTCCAAGACCACCCATGCCGA
Primer sequences used for stem loop qRT-PCR analysis
miRNA		RT-primer	Forward primer (5′ to 3′)	Reverse primer (5′ to 3′)
miR156		GTCGTATCCAGTGCAGGGTCCGAGGTATTCGCACTGGATACGACTGTGCT	CGGCTGACAGAAGAGAGTG	GTGCAGGGTCCGAGGTATTC
miR222		GTCGTATCCAGTGCAGGGTCCGAGGTATTCGCACTGGATACGACTCGGCA	GCCGTTTCCAAGACCACCCA	GTGCAGGGTCCGAGGTATTC
northern blot prob sequence
miRNA	sequence (5'-3')
miR156	TGTGCTCACTCTCTTCTGTCA
miR396d	CAGTTCAAGAAAGCTGTGGAA
miR167d	GATCAGGCTGACAGCTTCA
miR169a	GCAGGCAAATCATCCTTGGCTA
miR166a	AGGGAATGAAGCCTGGTCCGA
miR164a	TGCACGTGCCCTGCTTCTCCA
Primer for cloning full length
gene		F	R
SBP3		TGCTTGTGGATTCTATGGAG	AGTGACTGAATGGATTCCAG
GRF4		GCAGATTGGTGGGAGTAAC	GGTTTGATTACTTGAAGTATCC
miR156		TGGTCTGATCACGGTCTG	TTCTCATGTGTTCAACTACTAC
miR396b		GGTGTCTACAGATGATCCTC	CCAAACCCATATCCGATCG
Primer for Co‑transformation
gene		FP	RP
SBP3		AGAACACGGGGGACTCTAGAATGAATTCTCTCCCTGCAATG	GACTGACCACCCGGGGATCCGTTCATCAGATTTGGATAAAGG
GRF4		AGAACACGGGGGACTCTAGAATGGTGGATTTTGGGGCTG	GACTGACCACCCGGGGATCCTTGCAAGGATGGAATAGAGAAC
miR156		CGGGGGACTCTAGAGGATCCTCTCGTTCTGGGTCTCTG	GATCGGGGAAATTCGAGCTCTTCTCATGTGTTCAACTACTAC
miR396b		CGGGGGACTCTAGAGGATCCGGTGTCTACAGATGATCCTC	GATCGGGGAAATTCGAGCTCCCAAACCCATATCCGATCG

## Sheet: Table S2
Table S2. Summary of the RNA-seq results of different leaf positions in tea plants
Sample	Clean_reads	clean_bases	Read_length (bp)	Q20(%)	GC(%)
B-1A	43418728	6512809200	150	0.9442	0.4325
B-2A	43760084	6564012600	150	0.9465	0.4471
B-3A	43973808	6596071200	150	0.9496	0.44
L1-1A	43980208	6597031200	150	0.9478	0.4405
L1-2A	44220848	6633127200	150	0.9493	0.4485
L1-3A	44239250	6635887500	150	0.9501	0.4465
L2-1A	44446982	6667047300	150	0.9454	0.4447
L2-2A	43983716	6597557400	150	0.9434	0.4394
L2-3A	43551836	6532775400	150	0.9411	0.4297
L3-1A	43413002	6511950300	150	0.9406	0.4337
L4-1A	44233228	6634984200	150	0.9454	0.4431
L4-3A	44184222	6627633300	150	0.9425	0.4351
L3-2B	44112964	6616944600	150	0.9414	0.429
L3-3B	44203282	6630492300	150	0.9437	0.4353
L4-2B	44137658	6620648700	150	0.9451	0.4402

## Sheet: Table S3
Table S3. The gene IDs of the eight clusters in SOM analysis
CS1	CS2	CS3	CS4	CS5	CS6	CS7	CS8
TEA000014.1	TEA000017.1	TEA000088.1	TEA000016.1	TEA000201.1	TEA000010.1	TEA000464.1	TEA000008.1
TEA000219.1	TEA000108.1	TEA001170.1	TEA000045.1	TEA000227.1	TEA000012.1	TEA000522.1	TEA000018.1
TEA000355.1	TEA000133.1	TEA001404.1	TEA000054.1	TEA000232.1	TEA000013.1	TEA000868.1	TEA000048.1
TEA000389.1	TEA000186.1	TEA002025.1	TEA000085.1	TEA000263.1	TEA000021.1	TEA000887.1	TEA000071.1
TEA000397.1	TEA000194.1	TEA002474.1	TEA000184.1	TEA000287.1	TEA000028.1	TEA001386.1	TEA000095.1
TEA000462.1	TEA000214.1	TEA002782.1	TEA000187.1	TEA000428.1	TEA000029.1	TEA001389.1	TEA000100.1
TEA000478.1	TEA000216.1	TEA002875.1	TEA000203.1	TEA000432.1	TEA000079.1	TEA001401.1	TEA000101.1
TEA000605.1	TEA000222.1	TEA002960.1	TEA000206.1	TEA000440.1	TEA000114.1	TEA001403.1	TEA000121.1
TEA000978.1	TEA000246.1	TEA003185.1	TEA000236.1	TEA000466.1	TEA000135.1	TEA001416.1	TEA000123.1
TEA001004.1	TEA000368.1	TEA003248.1	TEA000265.1	TEA000488.1	TEA000163.1	TEA001709.1	TEA000130.1
TEA001010.1	TEA000445.1	TEA003361.1	TEA000377.1	TEA000525.1	TEA000173.1	TEA001907.1	TEA000141.1
TEA001024.1	TEA000496.1	TEA003556.1	TEA000459.1	TEA000554.1	TEA000179.1	TEA002126.1	TEA000197.1
TEA001025.1	TEA000509.1	TEA003571.1	TEA000484.1	TEA000566.1	TEA000238.1	TEA002227.1	TEA000215.1
TEA001083.1	TEA000549.1	TEA003679.1	TEA000502.1	TEA000606.1	TEA000257.1	TEA002328.1	TEA000224.1
TEA001110.1	TEA000555.1	TEA003726.1	TEA000503.1	TEA000639.1	TEA000258.1	TEA002603.1	TEA000234.1
TEA001126.1	TEA000590.1	TEA003905.1	TEA000545.1	TEA000663.1	TEA000272.1	TEA002608.1	TEA000239.1
TEA001204.1	TEA000592.1	TEA004028.1	TEA000672.1	TEA000675.1	TEA000274.1	TEA002811.1	TEA000260.1
TEA001213.1	TEA000625.1	TEA004037.1	TEA000749.1	TEA000683.1	TEA000303.1	TEA002973.1	TEA000293.1
TEA001304.1	TEA000669.1	TEA004392.1	TEA000809.1	TEA000698.1	TEA000307.1	TEA003430.1	TEA000376.1
TEA001306.1	TEA000704.1	TEA004995.1	TEA000823.1	TEA000708.1	TEA000332.1	TEA003666.1	TEA000378.1
TEA001318.1	TEA000780.1	TEA005113.1	TEA000831.1	TEA000725.1	TEA000344.1	TEA004229.1	TEA000382.1
TEA001347.1	TEA000929.1	TEA005204.1	TEA000833.1	TEA000766.1	TEA000345.1	TEA004344.1	TEA000421.1
TEA001379.1	TEA000940.1	TEA005430.1	TEA001006.1	TEA000787.1	TEA000369.1	TEA004388.1	TEA000443.1
TEA001396.1	TEA000965.1	TEA005631.1	TEA001007.1	TEA000845.1	TEA000372.1	TEA004520.1	TEA000444.1
TEA001439.1	TEA000975.1	TEA005738.1	TEA001046.1	TEA000920.1	TEA000374.1	TEA004650.1	TEA000446.1
TEA001452.1	TEA001001.1	TEA005821.1	TEA001058.1	TEA000954.1	TEA000387.1	TEA004919.1	TEA000492.1
TEA001466.1	TEA001030.1	TEA006229.1	TEA001066.1	TEA000961.1	TEA000429.1	TEA005146.1	TEA000510.1
TEA001548.1	TEA001091.1	TEA006290.1	TEA001067.1	TEA000966.1	TEA000477.1	TEA005264.1	TEA000535.1
TEA001626.1	TEA001135.1	TEA007086.1	TEA001162.1	TEA000980.1	TEA000491.1	TEA005540.1	TEA000543.1
TEA001639.1	TEA001199.1	TEA007498.1	TEA001397.1	TEA000999.1	TEA000596.1	TEA005623.1	TEA000615.1
TEA001657.1	TEA001212.1	TEA007546.1	TEA001407.1	TEA001023.1	TEA000629.1	TEA006408.1	TEA000634.1
TEA001702.1	TEA001274.1	TEA007718.1	TEA001447.1	TEA001054.1	TEA000640.1	TEA006430.1	TEA000687.1
TEA001749.1	TEA001364.1	TEA007768.1	TEA001484.1	TEA001068.1	TEA000646.1	TEA006564.1	TEA000726.1
TEA001797.1	TEA001367.1	TEA007771.1	TEA001586.1	TEA001079.1	TEA000664.1	TEA007034.1	TEA000753.1
TEA001817.1	TEA001370.1	TEA007882.1	TEA001642.1	TEA001099.1	TEA000699.1	TEA007217.1	TEA000759.1
TEA001873.1	TEA001415.1	TEA008391.1	TEA001938.1	TEA001150.1	TEA000732.1	TEA007422.1	TEA000762.1
TEA001906.1	TEA001455.1	TEA008441.1	TEA001996.1	TEA001207.1	TEA000746.1	TEA007447.1	TEA000768.1
TEA001912.1	TEA001468.1	TEA008527.1	TEA002044.1	TEA001209.1	TEA000755.1	TEA007923.1	TEA000773.1
TEA001950.1	TEA001507.1	TEA008568.1	TEA002086.1	TEA001258.1	TEA000760.1	TEA008006.1	TEA000784.1
TEA001965.1	TEA001563.1	TEA008903.1	TEA002159.1	TEA001260.1	TEA000776.1	TEA008365.1	TEA000817.1
TEA001989.1	TEA001605.1	TEA009018.1	TEA002351.1	TEA001290.1	TEA000786.1	TEA008414.1	TEA000825.1
TEA002002.1	TEA001660.1	TEA009122.1	TEA002411.1	TEA001309.1	TEA000788.1	TEA008529.1	TEA000829.1
TEA002033.1	TEA001690.1	TEA010168.1	TEA002446.1	TEA001324.1	TEA000798.1	TEA008619.1	TEA000837.1
TEA002055.1	TEA001751.1	TEA010308.1	TEA002467.1	TEA001332.1	TEA000802.1	TEA008874.1	TEA000844.1
TEA002095.1	TEA001763.1	TEA010448.1	TEA002528.1	TEA001402.1	TEA000816.1	TEA009765.1	TEA000855.1
TEA002102.1	TEA001808.1	TEA010906.1	TEA002654.1	TEA001441.1	TEA000848.1	TEA009778.1	TEA000863.1
TEA002178.1	TEA001905.1	TEA010981.1	TEA002689.1	TEA001471.1	TEA000854.1	TEA010039.1	TEA000885.1
TEA002207.1	TEA001931.1	TEA011010.1	TEA002747.1	TEA001485.1	TEA000867.1	TEA010682.1	TEA000915.1
TEA002224.1	TEA001935.1	TEA012704.1	TEA002789.1	TEA001505.1	TEA000890.1	TEA010788.1	TEA000922.1
TEA002295.1	TEA001991.1	TEA012863.1	TEA002856.1	TEA001539.1	TEA000904.1	TEA011107.1	TEA000964.1
TEA002320.1	TEA001992.1	TEA013726.1	TEA002979.1	TEA001543.1	TEA000911.1	TEA011169.1	TEA000971.1
TEA002335.1	TEA001994.1	TEA013801.1	TEA003000.1	TEA001545.1	TEA000928.1	TEA011336.1	TEA000987.1
TEA002349.1	TEA002009.1	TEA013877.1	TEA003057.1	TEA001613.1	TEA000942.1	TEA011370.1	TEA000993.1
TEA002371.1	TEA002013.1	TEA014948.1	TEA003173.1	TEA001634.1	TEA000953.1	TEA011661.1	TEA000998.1
TEA002444.1	TEA002014.1	TEA014978.1	TEA003220.1	TEA001641.1	TEA000959.1	TEA011867.1	TEA001018.1
TEA002562.1	TEA002022.1	TEA015301.1	TEA003234.1	TEA001653.1	TEA001003.1	TEA011973.1	TEA001055.1
TEA002572.1	TEA002097.1	TEA015709.1	TEA003365.1	TEA001658.1	TEA001020.1	TEA012233.1	TEA001059.1
TEA002615.1	TEA002153.1	TEA015741.1	TEA003380.1	TEA001688.1	TEA001040.1	TEA012464.1	TEA001060.1
TEA002620.1	TEA002190.1	TEA015745.1	TEA003391.1	TEA001698.1	TEA001069.1	TEA012891.1	TEA001089.1
TEA002635.1	TEA002237.1	TEA015913.1	TEA003402.1	TEA001708.1	TEA001084.1	TEA012954.1	TEA001122.1
TEA002636.1	TEA002239.1	TEA016206.1	TEA003470.1	TEA001736.1	TEA001090.1	TEA013390.1	TEA001156.1
TEA002641.1	TEA002272.1	TEA016604.1	TEA003500.1	TEA001811.1	TEA001105.1	TEA013444.1	TEA001157.1
TEA002677.1	TEA002288.1	TEA016817.1	TEA003569.1	TEA001848.1	TEA001106.1	TEA014154.1	TEA001173.1
TEA002824.1	TEA002316.1	TEA017008.1	TEA003599.1	TEA001860.1	TEA001108.1	TEA014973.1	TEA001193.1
TEA002845.1	TEA002405.1	TEA017367.1	TEA003630.1	TEA001876.1	TEA001142.1	TEA015171.1	TEA001272.1
TEA002976.1	TEA002415.1	TEA017457.1	TEA003691.1	TEA001883.1	TEA001175.1	TEA015502.1	TEA001276.1
TEA002984.1	TEA002416.1	TEA017695.1	TEA003693.1	TEA001913.1	TEA001201.1	TEA015519.1	TEA001293.1
TEA002992.1	TEA002508.1	TEA017763.1	TEA003699.1	TEA001917.1	TEA001225.1	TEA015557.1	TEA001313.1
TEA003014.1	TEA002537.1	TEA017986.1	TEA003730.1	TEA001974.1	TEA001233.1	TEA015767.1	TEA001382.1
TEA003058.1	TEA002570.1	TEA018271.1	TEA003764.1	TEA002037.1	TEA001261.1	TEA015786.1	TEA001383.1
TEA003091.1	TEA002617.1	TEA018272.1	TEA003768.1	TEA002063.1	TEA001262.1	TEA016171.1	TEA001387.1
TEA003092.1	TEA002684.1	TEA018351.1	TEA003799.1	TEA002079.1	TEA001317.1	TEA016261.1	TEA001388.1
TEA003115.1	TEA002695.1	TEA018644.1	TEA003849.1	TEA002161.1	TEA001463.1	TEA016325.1	TEA001393.1
TEA003241.1	TEA002766.1	TEA018768.1	TEA003850.1	TEA002201.1	TEA001575.1	TEA016760.1	TEA001398.1
TEA003242.1	TEA002839.1	TEA018834.1	TEA003859.1	TEA002233.1	TEA001608.1	TEA016792.1	TEA001406.1
TEA003283.1	TEA002847.1	TEA019354.1	TEA003984.1	TEA002235.1	TEA001630.1	TEA017196.1	TEA001490.1
TEA003401.1	TEA002848.1	TEA019644.1	TEA003997.1	TEA002281.1	TEA001666.1	TEA017263.1	TEA001502.1
TEA003419.1	TEA002901.1	TEA020055.1	TEA004003.1	TEA002301.1	TEA001699.1	TEA017452.1	TEA001524.1
TEA003514.1	TEA002904.1	TEA020261.1	TEA004056.1	TEA002331.1	TEA001738.1	TEA018888.1	TEA001535.1
TEA003615.1	TEA002944.1	TEA020470.1	TEA004079.1	TEA002443.1	TEA001778.1	TEA019323.1	TEA001587.1
TEA003616.1	TEA003078.1	TEA022613.1	TEA004103.1	TEA002503.1	TEA001784.1	TEA019356.1	TEA001593.1
TEA003690.1	TEA003239.1	TEA023591.1	TEA004186.1	TEA002523.1	TEA001822.1	TEA019485.1	TEA001604.1
TEA003728.1	TEA003252.1	TEA023733.1	TEA004199.1	TEA002540.1	TEA001828.1	TEA019636.1	TEA001607.1
TEA003733.1	TEA003262.1	TEA024495.1	TEA004320.1	TEA002543.1	TEA001834.1	TEA019723.1	TEA001618.1
TEA003738.1	TEA003266.1	TEA024564.1	TEA004365.1	TEA002599.1	TEA001837.1	TEA019827.1	TEA001637.1
TEA003825.1	TEA003319.1	TEA024839.1	TEA004379.1	TEA002600.1	TEA001838.1	TEA019939.1	TEA001644.1
TEA003933.1	TEA003405.1	TEA024937.1	TEA004474.1	TEA002672.1	TEA001841.1	TEA020294.1	TEA001659.1
TEA003976.1	TEA003439.1	TEA025673.1	TEA004487.1	TEA002683.1	TEA001845.1	TEA020484.1	TEA001672.1
TEA003993.1	TEA003559.1	TEA025770.1	TEA004547.1	TEA002697.1	TEA001894.1	TEA020796.1	TEA001676.1
TEA004009.1	TEA003584.1	TEA025777.1	TEA004589.1	TEA002711.1	TEA001900.1	TEA021163.1	TEA001686.1
TEA004021.1	TEA003607.1	TEA025828.1	TEA004596.1	TEA002734.1	TEA001909.1	TEA021290.1	TEA001696.1
TEA004034.1	TEA003635.1	TEA026101.1	TEA004609.1	TEA002735.1	TEA001966.1	TEA021399.1	TEA001716.1
TEA004042.1	TEA003640.1	TEA026487.1	TEA004617.1	TEA002770.1	TEA001968.1	TEA021460.1	TEA001718.1
TEA004047.1	TEA003643.1	TEA026885.1	TEA004643.1	TEA002784.1	TEA001972.1	TEA021636.1	TEA001724.1
TEA004051.1	TEA003701.1	TEA027030.1	TEA004645.1	TEA002805.1	TEA001981.1	TEA021826.1	TEA001743.1
TEA004057.1	TEA003724.1	TEA027155.1	TEA004647.1	TEA002835.1	TEA001990.1	TEA021951.1	TEA001786.1
TEA004109.1	TEA003727.1	TEA027225.1	TEA004657.1	TEA002908.1	TEA002006.1	TEA021977.1	TEA001804.1
TEA004127.1	TEA003834.1	TEA027596.1	TEA004752.1	TEA002948.1	TEA002011.1	TEA022233.1	TEA001849.1
TEA004129.1	TEA003844.1	TEA028113.1	TEA004765.1	TEA002994.1	TEA002041.1	TEA022276.1	TEA001864.1
TEA004163.1	TEA003874.1	TEA028469.1	TEA004819.1	TEA003002.1	TEA002061.1	TEA023174.1	TEA001868.1
TEA004195.1	TEA003897.1	TEA028498.1	TEA004885.1	TEA003079.1	TEA002077.1	TEA023207.1	TEA001871.1
TEA004196.1	TEA003940.1	TEA028945.1	TEA004978.1	TEA003085.1	TEA002089.1	TEA023584.1	TEA001944.1
TEA004234.1	TEA004052.1	TEA029496.1	TEA005091.1	TEA003097.1	TEA002116.1	TEA023966.1	TEA002020.1
TEA004243.1	TEA004076.1	TEA029654.1	TEA005122.1	TEA003111.1	TEA002141.1	TEA024008.1	TEA002046.1
TEA004267.1	TEA004102.1	TEA029779.1	TEA005207.1	TEA003120.1	TEA002184.1	TEA024337.1	TEA002069.1
TEA004366.1	TEA004223.1	TEA030851.1	TEA005213.1	TEA003157.1	TEA002196.1	TEA024621.1	TEA002104.1
TEA004368.1	TEA004268.1	TEA030909.1	TEA005221.1	TEA003170.1	TEA002203.1	TEA024658.1	TEA002117.1
TEA004371.1	TEA004276.1	TEA030999.1	TEA005255.1	TEA003174.1	TEA002205.1	TEA024879.1	TEA002140.1
TEA004409.1	TEA004285.1	TEA031420.1	TEA005279.1	TEA003182.1	TEA002223.1	TEA024913.1	TEA002154.1
TEA004467.1	TEA004291.1	TEA031476.1	TEA005286.1	TEA003186.1	TEA002225.1	TEA025088.1	TEA002175.1
TEA004482.1	TEA004357.1	TEA032329.1	TEA005303.1	TEA003278.1	TEA002230.1	TEA025179.1	TEA002215.1
TEA004542.1	TEA004453.1	TEA032422.1	TEA005327.1	TEA003280.1	TEA002244.1	TEA025786.1	TEA002240.1
TEA004566.1	TEA004539.1	TEA033263.1	TEA005334.1	TEA003294.1	TEA002245.1	TEA025945.1	TEA002271.1
TEA004618.1	TEA004601.1	TEA033841.1	TEA005349.1	TEA003411.1	TEA002278.1	TEA026046.1	TEA002296.1
TEA004675.1	TEA004606.1	TEA033846.1	TEA005388.1	TEA003442.1	TEA002304.1	TEA026062.1	TEA002299.1
TEA004686.1	TEA004633.1		TEA005397.1	TEA003451.1	TEA002372.1	TEA026398.1	TEA002308.1
TEA004708.1	TEA004782.1		TEA005398.1	TEA003478.1	TEA002421.1	TEA026961.1	TEA002325.1
TEA004731.1	TEA004792.1		TEA005418.1	TEA003481.1	TEA002455.1	TEA027098.1	TEA002379.1
TEA004906.1	TEA004794.1		TEA005427.1	TEA003484.1	TEA002468.1	TEA027130.1	TEA002404.1
TEA004918.1	TEA004832.1		TEA005437.1	TEA003503.1	TEA002550.1	TEA027448.1	TEA002412.1
TEA004969.1	TEA004851.1		TEA005496.1	TEA003529.1	TEA002560.1	TEA027710.1	TEA002418.1
TEA005008.1	TEA004938.1		TEA005603.1	TEA003568.1	TEA002607.1	TEA028229.1	TEA002419.1
TEA005036.1	TEA005017.1		TEA005648.1	TEA003573.1	TEA002613.1	TEA028648.1	TEA002470.1
TEA005041.1	TEA005054.1		TEA005656.1	TEA003637.1	TEA002623.1	TEA028946.1	TEA002476.1
TEA005094.1	TEA005076.1		TEA005662.1	TEA003669.1	TEA002669.1	TEA029305.1	TEA002542.1
TEA005126.1	TEA005107.1		TEA005725.1	TEA003736.1	TEA002703.1	TEA029991.1	TEA002548.1
TEA005305.1	TEA005114.1		TEA005744.1	TEA003741.1	TEA002719.1	TEA031170.1	TEA002554.1
TEA005365.1	TEA005161.1		TEA005767.1	TEA003809.1	TEA002727.1	TEA031599.1	TEA002555.1
TEA005366.1	TEA005164.1		TEA005785.1	TEA003853.1	TEA002795.1	TEA032008.1	TEA002563.1
TEA005404.1	TEA005191.1		TEA005789.1	TEA003861.1	TEA002829.1	TEA032178.1	TEA002590.1
TEA005420.1	TEA005265.1		TEA005819.1	TEA003917.1	TEA002836.1	TEA032551.1	TEA002591.1
TEA005438.1	TEA005270.1		TEA005844.1	TEA003962.1	TEA002886.1	TEA033031.1	TEA002597.1
TEA005466.1	TEA005301.1		TEA005925.1	TEA003969.1	TEA002891.1	TEA033405.1	TEA002602.1
TEA005482.1	TEA005353.1		TEA006056.1	TEA004006.1	TEA002899.1		TEA002612.1
TEA005489.1	TEA005362.1		TEA006112.1	TEA004013.1	TEA002922.1		TEA002640.1
TEA005552.1	TEA005386.1		TEA006151.1	TEA004030.1	TEA003015.1		TEA002659.1
TEA005589.1	TEA005392.1		TEA006170.1	TEA004074.1	TEA003023.1		TEA002675.1
TEA005594.1	TEA005426.1		TEA006182.1	TEA004087.1	TEA003052.1		TEA002700.1
TEA005671.1	TEA005428.1		TEA006198.1	TEA004138.1	TEA003093.1		TEA002738.1
TEA005696.1	TEA005447.1		TEA006228.1	TEA004159.1	TEA003101.1		TEA002746.1
TEA005699.1	TEA005449.1		TEA006330.1	TEA004197.1	TEA003137.1		TEA002760.1
TEA005727.1	TEA005488.1		TEA006337.1	TEA004204.1	TEA003144.1		TEA002765.1
TEA005743.1	TEA005573.1		TEA006376.1	TEA004231.1	TEA003145.1		TEA002814.1
TEA005800.1	TEA005574.1		TEA006416.1	TEA004247.1	TEA003148.1		TEA002871.1
TEA005801.1	TEA005580.1		TEA006519.1	TEA004270.1	TEA003156.1		TEA002897.1
TEA005802.1	TEA005608.1		TEA006531.1	TEA004310.1	TEA003161.1		TEA002974.1
TEA005827.1	TEA005670.1		TEA006621.1	TEA004312.1	TEA003184.1		TEA002993.1
TEA005829.1	TEA005685.1		TEA006626.1	TEA004375.1	TEA003190.1		TEA002995.1
TEA005839.1	TEA005717.1		TEA006791.1	TEA004471.1	TEA003196.1		TEA003048.1
TEA005841.1	TEA005736.1		TEA006798.1	TEA004493.1	TEA003201.1		TEA003059.1
TEA005857.1	TEA005752.1		TEA006802.1	TEA004497.1	TEA003216.1		TEA003064.1
TEA005865.1	TEA005774.1		TEA006804.1	TEA004498.1	TEA003221.1		TEA003117.1
TEA005919.1	TEA005784.1		TEA006809.1	TEA004506.1	TEA003269.1		TEA003138.1
TEA005927.1	TEA005808.1		TEA006889.1	TEA004527.1	TEA003343.1		TEA003149.1
TEA005948.1	TEA006048.1		TEA007023.1	TEA004552.1	TEA003378.1		TEA003164.1
TEA005981.1	TEA006116.1		TEA007038.1	TEA004662.1	TEA003407.1		TEA003176.1
TEA006009.1	TEA006199.1		TEA007188.1	TEA004703.1	TEA003409.1		TEA003203.1
TEA006013.1	TEA006216.1		TEA007197.1	TEA004733.1	TEA003488.1		TEA003212.1
TEA006042.1	TEA006250.1		TEA007274.1	TEA004745.1	TEA003509.1		TEA003219.1
TEA006105.1	TEA006340.1		TEA007281.1	TEA004770.1	TEA003523.1		TEA003222.1
TEA006150.1	TEA006353.1		TEA007295.1	TEA004785.1	TEA003578.1		TEA003255.1
TEA006272.1	TEA006374.1		TEA007299.1	TEA004830.1	TEA003593.1		TEA003261.1
TEA006332.1	TEA006406.1		TEA007410.1	TEA004879.1	TEA003621.1		TEA003277.1
TEA006339.1	TEA006411.1		TEA007469.1	TEA005019.1	TEA003625.1		TEA003290.1
TEA006358.1	TEA006435.1		TEA007478.1	TEA005092.1	TEA003636.1		TEA003311.1
TEA006393.1	TEA006463.1		TEA007481.1	TEA005198.1	TEA003663.1		TEA003323.1
TEA006402.1	TEA006471.1		TEA007495.1	TEA005202.1	TEA003785.1		TEA003333.1
TEA006423.1	TEA006478.1		TEA007510.1	TEA005236.1	TEA003812.1		TEA003336.1
TEA006457.1	TEA006487.1		TEA007519.1	TEA005244.1	TEA003864.1		TEA003340.1
TEA006546.1	TEA006488.1		TEA007758.1	TEA005297.1	TEA003881.1		TEA003342.1
TEA006634.1	TEA006502.1		TEA007804.1	TEA005317.1	TEA003904.1		TEA003346.1
TEA006699.1	TEA006566.1		TEA007820.1	TEA005335.1	TEA003916.1		TEA003375.1
TEA006793.1	TEA006575.1		TEA007871.1	TEA005352.1	TEA003973.1		TEA003382.1
TEA006851.1	TEA006682.1		TEA007881.1	TEA005381.1	TEA004045.1		TEA003427.1
TEA006887.1	TEA006766.1		TEA007917.1	TEA005393.1	TEA004060.1		TEA003454.1
TEA006919.1	TEA006781.1		TEA007920.1	TEA005511.1	TEA004065.1		TEA003469.1
TEA006971.1	TEA006886.1		TEA007925.1	TEA005512.1	TEA004069.1		TEA003540.1
TEA006992.1	TEA006890.1		TEA008098.1	TEA005530.1	TEA004098.1		TEA003598.1
TEA007001.1	TEA006902.1		TEA008140.1	TEA005534.1	TEA004150.1		TEA003613.1
TEA007085.1	TEA006915.1		TEA008183.1	TEA005678.1	TEA004226.1		TEA003627.1
TEA007177.1	TEA006917.1		TEA008190.1	TEA005716.1	TEA004245.1		TEA003632.1
TEA007238.1	TEA006945.1		TEA008204.1	TEA005764.1	TEA004265.1		TEA003672.1
TEA007240.1	TEA006949.1		TEA008241.1	TEA005813.1	TEA004278.1		TEA003723.1
TEA007244.1	TEA006974.1		TEA008244.1	TEA005889.1	TEA004292.1		TEA003776.1
TEA007272.1	TEA007045.1		TEA008270.1	TEA005894.1	TEA004308.1		TEA003777.1
TEA007345.1	TEA007054.1		TEA008306.1	TEA005911.1	TEA004330.1		TEA003778.1
TEA007346.1	TEA007063.1		TEA008409.1	TEA005945.1	TEA004332.1		TEA003800.1
TEA007356.1	TEA007219.1		TEA008449.1	TEA006050.1	TEA004359.1		TEA003801.1
TEA007386.1	TEA007283.1		TEA008459.1	TEA006060.1	TEA004362.1		TEA003822.1
TEA007509.1	TEA007418.1		TEA008479.1	TEA006071.1	TEA004396.1		TEA003840.1
TEA007534.1	TEA007439.1		TEA008513.1	TEA006185.1	TEA004455.1		TEA003846.1
TEA007537.1	TEA007473.1		TEA008514.1	TEA006187.1	TEA004465.1		TEA003855.1
TEA007551.1	TEA007476.1		TEA008536.1	TEA006257.1	TEA004483.1		TEA003888.1
TEA007567.1	TEA007514.1		TEA008613.1	TEA006271.1	TEA004508.1		TEA003922.1
TEA007750.1	TEA007515.1		TEA008626.1	TEA006274.1	TEA004516.1		TEA003932.1
TEA007755.1	TEA007550.1		TEA008808.1	TEA006280.1	TEA004532.1		TEA003935.1
TEA007961.1	TEA007596.1		TEA008869.1	TEA006297.1	TEA004537.1		TEA003967.1
TEA008062.1	TEA007610.1		TEA008875.1	TEA006321.1	TEA004543.1		TEA003968.1
TEA008070.1	TEA007638.1		TEA008876.1	TEA006349.1	TEA004628.1		TEA004007.1
TEA008115.1	TEA007644.1		TEA008907.1	TEA006442.1	TEA004667.1		TEA004111.1
TEA008150.1	TEA007666.1		TEA008983.1	TEA006444.1	TEA004690.1		TEA004118.1
TEA008235.1	TEA007671.1		TEA009049.1	TEA006475.1	TEA004738.1		TEA004120.1
TEA008275.1	TEA007757.1		TEA009124.1	TEA006483.1	TEA004757.1		TEA004184.1
TEA008301.1	TEA007808.1		TEA009150.1	TEA006560.1	TEA004775.1		TEA004216.1
TEA008309.1	TEA007810.1		TEA009399.1	TEA006577.1	TEA004777.1		TEA004249.1
TEA008318.1	TEA007846.1		TEA009439.1	TEA006659.1	TEA004781.1		TEA004253.1
TEA008333.1	TEA007876.1		TEA009562.1	TEA006690.1	TEA004812.1		TEA004266.1
TEA008352.1	TEA007958.1		TEA009650.1	TEA006704.1	TEA004817.1		TEA004297.1
TEA008381.1	TEA008021.1		TEA009672.1	TEA006706.1	TEA004836.1		TEA004301.1
TEA008435.1	TEA008116.1		TEA009728.1	TEA006741.1	TEA004840.1		TEA004306.1
TEA008601.1	TEA008216.1		TEA009745.1	TEA006870.1	TEA004844.1		TEA004322.1
TEA008602.1	TEA008220.1		TEA009753.1	TEA006936.1	TEA004847.1		TEA004352.1
TEA008628.1	TEA008261.1		TEA009754.1	TEA006983.1	TEA004873.1		TEA004394.1
TEA008747.1	TEA008311.1		TEA009777.1	TEA007120.1	TEA004972.1		TEA004436.1
TEA008757.1	TEA008316.1		TEA009858.1	TEA007137.1	TEA005026.1		TEA004448.1
TEA008821.1	TEA008382.1		TEA009910.1	TEA007201.1	TEA005045.1		TEA004503.1
TEA008837.1	TEA008439.1		TEA009923.1	TEA007207.1	TEA005050.1		TEA004522.1
TEA008881.1	TEA008488.1		TEA009969.1	TEA007234.1	TEA005077.1		TEA004530.1
TEA008918.1	TEA008771.1		TEA009994.1	TEA007301.1	TEA005116.1		TEA004540.1
TEA008936.1	TEA008832.1		TEA010027.1	TEA007307.1	TEA005130.1		TEA004550.1
TEA009028.1	TEA008868.1		TEA010058.1	TEA007317.1	TEA005142.1		TEA004556.1
TEA009030.1	TEA008893.1		TEA010126.1	TEA007333.1	TEA005156.1		TEA004654.1
TEA009064.1	TEA008908.1		TEA010128.1	TEA007374.1	TEA005163.1		TEA004760.1
TEA009076.1	TEA008938.1		TEA010135.1	TEA007388.1	TEA005180.1		TEA004783.1
TEA009086.1	TEA009003.1		TEA010150.1	TEA007395.1	TEA005230.1		TEA004806.1
TEA009141.1	TEA009053.1		TEA010228.1	TEA007489.1	TEA005271.1		TEA004810.1
TEA009166.1	TEA009071.1		TEA010240.1	TEA007506.1	TEA005275.1		TEA004825.1
TEA009249.1	TEA009084.1		TEA010252.1	TEA007553.1	TEA005290.1		TEA004829.1
TEA009250.1	TEA009126.1		TEA010275.1	TEA007555.1	TEA005299.1		TEA004839.1
TEA009268.1	TEA009158.1		TEA010342.1	TEA007556.1	TEA005384.1		TEA004865.1
TEA009303.1	TEA009186.1		TEA010357.1	TEA007561.1	TEA005394.1		TEA004867.1
TEA009338.1	TEA009193.1		TEA010380.1	TEA007583.1	TEA005414.1		TEA004880.1
TEA009340.1	TEA009345.1		TEA010420.1	TEA007621.1	TEA005480.1		TEA004883.1
TEA009382.1	TEA009347.1		TEA010423.1	TEA007623.1	TEA005508.1		TEA004922.1
TEA009433.1	TEA009379.1		TEA010431.1	TEA007691.1	TEA005520.1		TEA004926.1
TEA009441.1	TEA009388.1		TEA010458.1	TEA007704.1	TEA005586.1		TEA004931.1
TEA009527.1	TEA009394.1		TEA010474.1	TEA007711.1	TEA005588.1		TEA004934.1
TEA009543.1	TEA009454.1		TEA010484.1	TEA007712.1	TEA005613.1		TEA004946.1
TEA009553.1	TEA009532.1		TEA010499.1	TEA007734.1	TEA005617.1		TEA004948.1
TEA009581.1	TEA009655.1		TEA010530.1	TEA007793.1	TEA005636.1		TEA004965.1
TEA009696.1	TEA009683.1		TEA010532.1	TEA007813.1	TEA005658.1		TEA004998.1
TEA009714.1	TEA009707.1		TEA010584.1	TEA007835.1	TEA005681.1		TEA005059.1
TEA009755.1	TEA009716.1		TEA010610.1	TEA007836.1	TEA005787.1		TEA005071.1
TEA009805.1	TEA009721.1		TEA010666.1	TEA007851.1	TEA005952.1		TEA005090.1
TEA009843.1	TEA009787.1		TEA010724.1	TEA007889.1	TEA005979.1		TEA005108.1
TEA009913.1	TEA009837.1		TEA010756.1	TEA007936.1	TEA005998.1		TEA005110.1
TEA009926.1	TEA009956.1		TEA010762.1	TEA007937.1	TEA006012.1		TEA005151.1
TEA009938.1	TEA009981.1		TEA010800.1	TEA008020.1	TEA006040.1		TEA005178.1
TEA009987.1	TEA009983.1		TEA010806.1	TEA008026.1	TEA006078.1		TEA005188.1
TEA010153.1	TEA010031.1		TEA010811.1	TEA008084.1	TEA006101.1		TEA005220.1
TEA010217.1	TEA010114.1		TEA010854.1	TEA008127.1	TEA006164.1		TEA005235.1
TEA010255.1	TEA010156.1		TEA010867.1	TEA008144.1	TEA006173.1		TEA005296.1
TEA010267.1	TEA010208.1		TEA010900.1	TEA008148.1	TEA006202.1		TEA005307.1
TEA010314.1	TEA010219.1		TEA010969.1	TEA008210.1	TEA006217.1		TEA005320.1
TEA010426.1	TEA010256.1		TEA011013.1	TEA008230.1	TEA006237.1		TEA005340.1
TEA010434.1	TEA010276.1		TEA011053.1	TEA008300.1	TEA006264.1		TEA005410.1
TEA010445.1	TEA010287.1		TEA011057.1	TEA008367.1	TEA006287.1		TEA005425.1
TEA010516.1	TEA010440.1		TEA011058.1	TEA008398.1	TEA006305.1		TEA005439.1
TEA010755.1	TEA010453.1		TEA011103.1	TEA008402.1	TEA006400.1		TEA005463.1
TEA010768.1	TEA010460.1		TEA011104.1	TEA008405.1	TEA006428.1		TEA005465.1
TEA010793.1	TEA010510.1		TEA011154.1	TEA008448.1	TEA006485.1		TEA005467.1
TEA010823.1	TEA010528.1		TEA011195.1	TEA008454.1	TEA006492.1		TEA005484.1
TEA010850.1	TEA010549.1		TEA011340.1	TEA008483.1	TEA006496.1		TEA005558.1
TEA010860.1	TEA010551.1		TEA011479.1	TEA008534.1	TEA006500.1		TEA005581.1
TEA010861.1	TEA010604.1		TEA011749.1	TEA008537.1	TEA006517.1		TEA005598.1
TEA010925.1	TEA010609.1		TEA011753.1	TEA008558.1	TEA006530.1		TEA005601.1
TEA010992.1	TEA010681.1		TEA011779.1	TEA008575.1	TEA006558.1		TEA005607.1
TEA011012.1	TEA010698.1		TEA011810.1	TEA008586.1	TEA006581.1		TEA005614.1
TEA011019.1	TEA010728.1		TEA011957.1	TEA008618.1	TEA006586.1		TEA005618.1
TEA011056.1	TEA010779.1		TEA012010.1	TEA008657.1	TEA006602.1		TEA005622.1
TEA011059.1	TEA010817.1		TEA012154.1	TEA008658.1	TEA006604.1		TEA005690.1
TEA011081.1	TEA010848.1		TEA012279.1	TEA008670.1	TEA006614.1		TEA005782.1
TEA011083.1	TEA010865.1		TEA012281.1	TEA008708.1	TEA006619.1		TEA005837.1
TEA011099.1	TEA010873.1		TEA012289.1	TEA008731.1	TEA006630.1		TEA005849.1
TEA011150.1	TEA010892.1		TEA012314.1	TEA008739.1	TEA006644.1		TEA005850.1
TEA011166.1	TEA010917.1		TEA012350.1	TEA008783.1	TEA006652.1		TEA005853.1
TEA011188.1	TEA010987.1		TEA012358.1	TEA008786.1	TEA006661.1		TEA005861.1
TEA011208.1	TEA011036.1		TEA012432.1	TEA008794.1	TEA006678.1		TEA005870.1
TEA011225.1	TEA011037.1		TEA012492.1	TEA008839.1	TEA006688.1		TEA005876.1
TEA011315.1	TEA011243.1		TEA012526.1	TEA008850.1	TEA006743.1		TEA005880.1
TEA011375.1	TEA011257.1		TEA012572.1	TEA008909.1	TEA006756.1		TEA005943.1
TEA011428.1	TEA011273.1		TEA012582.1	TEA008912.1	TEA006769.1		TEA005983.1
TEA011439.1	TEA011330.1		TEA012597.1	TEA008926.1	TEA006800.1		TEA005985.1
TEA011452.1	TEA011358.1		TEA012617.1	TEA008957.1	TEA006808.1		TEA005989.1
TEA011553.1	TEA011435.1		TEA012653.1	TEA009007.1	TEA006818.1		TEA005995.1
TEA011572.1	TEA011453.1		TEA012722.1	TEA009023.1	TEA006822.1		TEA005999.1
TEA011582.1	TEA011531.1		TEA012789.1	TEA009027.1	TEA006823.1		TEA006021.1
TEA011601.1	TEA011689.1		TEA012816.1	TEA009042.1	TEA006840.1		TEA006029.1
TEA011615.1	TEA011697.1		TEA012947.1	TEA009105.1	TEA006873.1		TEA006079.1
TEA011642.1	TEA011765.1		TEA012986.1	TEA009133.1	TEA006874.1		TEA006085.1
TEA011686.1	TEA011817.1		TEA013030.1	TEA009153.1	TEA006883.1		TEA006100.1
TEA011690.1	TEA011822.1		TEA013052.1	TEA009163.1	TEA006959.1		TEA006109.1
TEA011781.1	TEA011908.1		TEA013065.1	TEA009215.1	TEA007044.1		TEA006120.1
TEA011790.1	TEA011921.1		TEA013112.1	TEA009219.1	TEA007052.1		TEA006137.1
TEA011848.1	TEA011952.1		TEA013148.1	TEA009220.1	TEA007061.1		TEA006141.1
TEA011876.1	TEA011990.1		TEA013158.1	TEA009335.1	TEA007073.1		TEA006177.1
TEA011880.1	TEA012118.1		TEA013208.1	TEA009402.1	TEA007106.1		TEA006178.1
TEA011886.1	TEA012184.1		TEA013290.1	TEA009422.1	TEA007110.1		TEA006186.1
TEA011903.1	TEA012201.1		TEA013305.1	TEA009487.1	TEA007113.1		TEA006209.1
TEA011946.1	TEA012210.1		TEA013359.1	TEA009529.1	TEA007140.1		TEA006218.1
TEA011981.1	TEA012291.1		TEA013393.1	TEA009557.1	TEA007243.1		TEA006269.1
TEA012150.1	TEA012311.1		TEA013405.1	TEA009582.1	TEA007251.1		TEA006275.1
TEA012151.1	TEA012320.1		TEA013423.1	TEA009604.1	TEA007305.1		TEA006283.1
TEA012175.1	TEA012353.1		TEA013443.1	TEA009605.1	TEA007347.1		TEA006354.1
TEA012191.1	TEA012388.1		TEA013462.1	TEA009625.1	TEA007366.1		TEA006383.1
TEA012220.1	TEA012410.1		TEA013484.1	TEA009645.1	TEA007423.1		TEA006388.1
TEA012284.1	TEA012456.1		TEA013508.1	TEA009695.1	TEA007462.1		TEA006418.1
TEA012334.1	TEA012495.1		TEA013632.1	TEA009737.1	TEA007471.1		TEA006434.1
TEA012340.1	TEA012496.1		TEA013686.1	TEA009749.1	TEA007543.1		TEA006458.1
TEA012351.1	TEA012604.1		TEA013703.1	TEA009761.1	TEA007559.1		TEA006494.1
TEA012365.1	TEA012645.1		TEA013731.1	TEA009780.1	TEA007565.1		TEA006497.1
TEA012398.1	TEA012656.1		TEA013952.1	TEA009833.1	TEA007569.1		TEA006514.1
TEA012434.1	TEA012670.1		TEA013961.1	TEA009860.1	TEA007572.1		TEA006537.1
TEA012462.1	TEA012672.1		TEA013977.1	TEA009866.1	TEA007597.1		TEA006562.1
TEA012502.1	TEA012720.1		TEA013991.1	TEA009927.1	TEA007634.1		TEA006576.1
TEA012535.1	TEA012721.1		TEA014003.1	TEA009960.1	TEA007639.1		TEA006585.1
TEA012544.1	TEA012739.1		TEA014108.1	TEA009970.1	TEA007663.1		TEA006597.1
TEA012723.1	TEA012746.1		TEA014109.1	TEA010009.1	TEA007708.1		TEA006653.1
TEA012777.1	TEA012769.1		TEA014112.1	TEA010152.1	TEA007721.1		TEA006673.1
TEA012829.1	TEA012848.1		TEA014113.1	TEA010157.1	TEA007732.1		TEA006710.1
TEA012913.1	TEA012878.1		TEA014125.1	TEA010193.1	TEA007769.1		TEA006712.1
TEA012924.1	TEA012931.1		TEA014142.1	TEA010215.1	TEA007773.1		TEA006713.1
TEA012973.1	TEA012988.1		TEA014193.1	TEA010229.1	TEA007776.1		TEA006719.1
TEA012981.1	TEA013011.1		TEA014251.1	TEA010249.1	TEA007786.1		TEA006749.1
TEA013002.1	TEA013019.1		TEA014284.1	TEA010266.1	TEA007841.1		TEA006777.1
TEA013015.1	TEA013066.1		TEA014293.1	TEA010300.1	TEA007865.1		TEA006787.1
TEA013018.1	TEA013100.1		TEA014302.1	TEA010311.1	TEA007866.1		TEA006794.1
TEA013023.1	TEA013103.1		TEA014322.1	TEA010326.1	TEA007877.1		TEA006852.1
TEA013073.1	TEA013125.1		TEA014324.1	TEA010363.1	TEA007947.1		TEA006865.1
TEA013081.1	TEA013138.1		TEA014384.1	TEA010471.1	TEA007982.1		TEA006871.1
TEA013145.1	TEA013163.1		TEA014389.1	TEA010522.1	TEA008016.1		TEA006966.1
TEA013170.1	TEA013274.1		TEA014391.1	TEA010600.1	TEA008018.1		TEA006969.1
TEA013194.1	TEA013292.1		TEA014393.1	TEA010612.1	TEA008025.1		TEA006973.1
TEA013288.1	TEA013304.1		TEA014430.1	TEA010618.1	TEA008035.1		TEA006980.1
TEA013395.1	TEA013307.1		TEA014441.1	TEA010623.1	TEA008095.1		TEA006998.1
TEA013413.1	TEA013356.1		TEA014476.1	TEA010687.1	TEA008105.1		TEA006999.1
TEA013417.1	TEA013422.1		TEA014486.1	TEA010730.1	TEA008129.1		TEA007010.1
TEA013594.1	TEA013436.1		TEA014553.1	TEA010766.1	TEA008141.1		TEA007022.1
TEA013620.1	TEA013437.1		TEA014607.1	TEA010776.1	TEA008186.1		TEA007031.1
TEA013633.1	TEA013438.1		TEA014723.1	TEA010781.1	TEA008197.1		TEA007048.1
TEA013636.1	TEA013528.1		TEA014731.1	TEA010787.1	TEA008219.1		TEA007060.1
TEA013641.1	TEA013679.1		TEA014768.1	TEA010794.1	TEA008247.1		TEA007078.1
TEA013687.1	TEA013845.1		TEA014810.1	TEA010827.1	TEA008290.1		TEA007089.1
TEA013712.1	TEA013857.1		TEA014836.1	TEA010837.1	TEA008293.1		TEA007112.1
TEA013722.1	TEA013874.1		TEA014865.1	TEA010880.1	TEA008312.1		TEA007132.1
TEA013763.1	TEA013921.1		TEA014876.1	TEA010950.1	TEA008351.1		TEA007145.1
TEA013875.1	TEA013928.1		TEA014939.1	TEA010951.1	TEA008364.1		TEA007150.1
TEA013885.1	TEA013932.1		TEA014987.1	TEA011100.1	TEA008375.1		TEA007153.1
TEA013899.1	TEA013942.1		TEA015014.1	TEA011179.1	TEA008411.1		TEA007174.1
TEA013908.1	TEA013962.1		TEA015067.1	TEA011242.1	TEA008418.1		TEA007187.1
TEA013922.1	TEA013994.1		TEA015085.1	TEA011272.1	TEA008428.1		TEA007192.1
TEA013933.1	TEA014013.1		TEA015130.1	TEA011276.1	TEA008431.1		TEA007260.1
TEA013984.1	TEA014034.1		TEA015180.1	TEA011310.1	TEA008436.1		TEA007311.1
TEA014018.1	TEA014052.1		TEA015215.1	TEA011434.1	TEA008443.1		TEA007325.1
TEA014056.1	TEA014071.1		TEA015241.1	TEA011449.1	TEA008452.1		TEA007343.1
TEA014075.1	TEA014104.1		TEA015258.1	TEA011481.1	TEA008498.1		TEA007369.1
TEA014088.1	TEA014123.1		TEA015359.1	TEA011542.1	TEA008503.1		TEA007448.1
TEA014103.1	TEA014177.1		TEA015414.1	TEA011544.1	TEA008508.1		TEA007450.1
TEA014116.1	TEA014227.1		TEA015482.1	TEA011567.1	TEA008530.1		TEA007457.1
TEA014117.1	TEA014254.1		TEA015505.1	TEA011598.1	TEA008557.1		TEA007465.1
TEA014128.1	TEA014320.1		TEA015531.1	TEA011603.1	TEA008610.1		TEA007472.1
TEA014166.1	TEA014328.1		TEA015537.1	TEA011606.1	TEA008631.1		TEA007526.1
TEA014256.1	TEA014372.1		TEA015555.1	TEA011626.1	TEA008648.1		TEA007529.1
TEA014297.1	TEA014390.1		TEA015579.1	TEA011641.1	TEA008676.1		TEA007530.1
TEA014410.1	TEA014437.1		TEA015663.1	TEA011648.1	TEA008677.1		TEA007557.1
TEA014487.1	TEA014567.1		TEA015673.1	TEA011655.1	TEA008678.1		TEA007578.1
TEA014527.1	TEA014582.1		TEA015683.1	TEA011656.1	TEA008687.1		TEA007591.1
TEA014697.1	TEA014590.1		TEA015727.1	TEA011658.1	TEA008720.1		TEA007609.1
TEA014705.1	TEA014690.1		TEA015785.1	TEA011662.1	TEA008754.1		TEA007631.1
TEA014719.1	TEA014692.1		TEA015849.1	TEA011694.1	TEA008870.1		TEA007632.1
TEA014729.1	TEA014700.1		TEA015872.1	TEA011742.1	TEA008872.1		TEA007687.1
TEA014781.1	TEA014747.1		TEA015988.1	TEA011759.1	TEA008951.1		TEA007693.1
TEA014819.1	TEA014790.1		TEA016001.1	TEA011862.1	TEA008952.1		TEA007719.1
TEA014837.1	TEA014809.1		TEA016118.1	TEA011888.1	TEA008999.1		TEA007723.1
TEA014867.1	TEA014922.1		TEA016251.1	TEA011911.1	TEA009073.1		TEA007740.1
TEA015003.1	TEA014952.1		TEA016262.1	TEA011941.1	TEA009147.1		TEA007764.1
TEA015019.1	TEA014974.1		TEA016295.1	TEA011974.1	TEA009174.1		TEA007777.1
TEA015105.1	TEA015092.1		TEA016380.1	TEA012033.1	TEA009212.1		TEA007784.1
TEA015128.1	TEA015103.1		TEA016507.1	TEA012047.1	TEA009224.1		TEA007787.1
TEA015214.1	TEA015109.1		TEA016590.1	TEA012050.1	TEA009242.1		TEA007812.1
TEA015219.1	TEA015111.1		TEA016596.1	TEA012062.1	TEA009244.1		TEA007819.1
TEA015224.1	TEA015118.1		TEA016679.1	TEA012110.1	TEA009254.1		TEA007822.1
TEA015290.1	TEA015197.1		TEA016700.1	TEA012128.1	TEA009256.1		TEA007840.1
TEA015303.1	TEA015202.1		TEA016732.1	TEA012129.1	TEA009261.1		TEA007849.1
TEA015316.1	TEA015211.1		TEA016737.1	TEA012241.1	TEA009294.1		TEA007858.1
TEA015319.1	TEA015213.1		TEA016743.1	TEA012242.1	TEA009298.1		TEA007894.1
TEA015321.1	TEA015349.1		TEA016752.1	TEA012258.1	TEA009370.1		TEA007922.1
TEA015323.1	TEA015370.1		TEA016771.1	TEA012317.1	TEA009406.1		TEA007927.1
TEA015360.1	TEA015426.1		TEA016893.1	TEA012376.1	TEA009447.1		TEA007960.1
TEA015401.1	TEA015429.1		TEA016910.1	TEA012397.1	TEA009453.1		TEA008045.1
TEA015453.1	TEA015464.1		TEA016930.1	TEA012451.1	TEA009462.1		TEA008050.1
TEA015481.1	TEA015472.1		TEA016931.1	TEA012475.1	TEA009485.1		TEA008073.1
TEA015485.1	TEA015504.1		TEA016992.1	TEA012491.1	TEA009522.1		TEA008086.1
TEA015528.1	TEA015511.1		TEA016998.1	TEA012520.1	TEA009546.1		TEA008102.1
TEA015573.1	TEA015514.1		TEA017052.1	TEA012541.1	TEA009621.1		TEA008108.1
TEA015680.1	TEA015701.1		TEA017105.1	TEA012600.1	TEA009679.1		TEA008113.1
TEA015947.1	TEA015717.1		TEA017117.1	TEA012647.1	TEA009704.1		TEA008131.1
TEA015966.1	TEA015825.1		TEA017119.1	TEA012659.1	TEA009706.1		TEA008147.1
TEA016043.1	TEA015906.1		TEA017261.1	TEA012728.1	TEA009739.1		TEA008153.1
TEA016048.1	TEA016012.1		TEA017271.1	TEA012753.1	TEA009747.1		TEA008187.1
TEA016050.1	TEA016151.1		TEA017348.1	TEA012774.1	TEA009760.1		TEA008208.1
TEA016096.1	TEA016183.1		TEA017496.1	TEA012790.1	TEA009810.1		TEA008246.1
TEA016144.1	TEA016185.1		TEA017712.1	TEA012793.1	TEA009816.1		TEA008258.1
TEA016225.1	TEA016223.1		TEA017727.1	TEA012794.1	TEA009817.1		TEA008272.1
TEA016229.1	TEA016246.1		TEA017881.1	TEA012862.1	TEA009826.1		TEA008313.1
TEA016276.1	TEA016274.1		TEA017978.1	TEA012887.1	TEA009828.1		TEA008314.1
TEA016297.1	TEA016403.1		TEA018114.1	TEA012909.1	TEA009844.1		TEA008322.1
TEA016326.1	TEA016418.1		TEA018181.1	TEA012968.1	TEA009846.1		TEA008346.1
TEA016332.1	TEA016427.1		TEA018194.1	TEA013043.1	TEA009863.1		TEA008350.1
TEA016408.1	TEA016444.1		TEA018259.1	TEA013128.1	TEA009872.1		TEA008380.1
TEA016415.1	TEA016461.1		TEA018262.1	TEA013133.1	TEA009889.1		TEA008397.1
TEA016450.1	TEA016514.1		TEA018267.1	TEA013167.1	TEA009907.1		TEA008403.1
TEA016456.1	TEA016520.1		TEA018292.1	TEA013176.1	TEA009932.1		TEA008410.1
TEA016493.1	TEA016524.1		TEA018321.1	TEA013186.1	TEA009936.1		TEA008417.1
TEA016506.1	TEA016526.1		TEA018403.1	TEA013283.1	TEA009937.1		TEA008426.1
TEA016602.1	TEA016631.1		TEA018482.1	TEA013308.1	TEA009947.1		TEA008472.1
TEA016689.1	TEA016686.1		TEA018496.1	TEA013323.1	TEA009967.1		TEA008473.1
TEA016722.1	TEA016716.1		TEA018512.1	TEA013341.1	TEA009978.1		TEA008491.1
TEA016843.1	TEA016718.1		TEA018558.1	TEA013375.1	TEA009995.1		TEA008497.1
TEA016879.1	TEA016788.1		TEA018564.1	TEA013379.1	TEA009999.1		TEA008533.1
TEA016935.1	TEA016826.1		TEA018659.1	TEA013382.1	TEA010004.1		TEA008535.1
TEA016997.1	TEA016828.1		TEA018671.1	TEA013416.1	TEA010017.1		TEA008556.1
TEA017048.1	TEA016882.1		TEA018840.1	TEA013426.1	TEA010060.1		TEA008560.1
TEA017070.1	TEA016934.1		TEA018854.1	TEA013430.1	TEA010063.1		TEA008570.1
TEA017088.1	TEA017059.1		TEA018855.1	TEA013588.1	TEA010105.1		TEA008573.1
TEA017095.1	TEA017166.1		TEA018857.1	TEA013596.1	TEA010170.1		TEA008590.1
TEA017096.1	TEA017275.1		TEA018900.1	TEA013598.1	TEA010184.1		TEA008596.1
TEA017157.1	TEA017341.1		TEA019152.1	TEA013617.1	TEA010194.1		TEA008627.1
TEA017189.1	TEA017368.1		TEA019155.1	TEA013618.1	TEA010272.1		TEA008645.1
TEA017201.1	TEA017501.1		TEA019228.1	TEA013642.1	TEA010288.1		TEA008653.1
TEA017212.1	TEA017526.1		TEA019235.1	TEA013653.1	TEA010289.1		TEA008655.1
TEA017220.1	TEA017553.1		TEA019380.1	TEA013660.1	TEA010315.1		TEA008662.1
TEA017238.1	TEA017557.1		TEA019412.1	TEA013667.1	TEA010318.1		TEA008694.1
TEA017267.1	TEA017570.1		TEA019421.1	TEA013670.1	TEA010330.1		TEA008703.1
TEA017388.1	TEA017592.1		TEA019466.1	TEA013708.1	TEA010399.1		TEA008715.1
TEA017442.1	TEA017611.1		TEA019521.1	TEA013733.1	TEA010441.1		TEA008718.1
TEA017454.1	TEA017614.1		TEA019555.1	TEA013760.1	TEA010449.1		TEA008734.1
TEA017458.1	TEA017647.1		TEA019569.1	TEA013772.1	TEA010488.1		TEA008737.1
TEA017514.1	TEA017692.1		TEA019635.1	TEA013959.1	TEA010490.1		TEA008755.1
TEA017549.1	TEA017765.1		TEA019668.1	TEA014030.1	TEA010513.1		TEA008768.1
TEA017621.1	TEA017769.1		TEA019674.1	TEA014048.1	TEA010529.1		TEA008791.1
TEA017644.1	TEA017828.1		TEA019846.1	TEA014062.1	TEA010557.1		TEA008796.1
TEA017661.1	TEA018040.1		TEA019924.1	TEA014089.1	TEA010625.1		TEA008797.1
TEA017714.1	TEA018085.1		TEA019938.1	TEA014161.1	TEA010631.1		TEA008851.1
TEA017741.1	TEA018087.1		TEA019960.1	TEA014187.1	TEA010633.1		TEA008855.1
TEA017753.1	TEA018129.1		TEA020048.1	TEA014216.1	TEA010665.1		TEA008857.1
TEA017802.1	TEA018172.1		TEA020178.1	TEA014265.1	TEA010671.1		TEA008898.1
TEA017819.1	TEA018244.1		TEA020191.1	TEA014288.1	TEA010680.1		TEA008899.1
TEA017823.1	TEA018251.1		TEA020209.1	TEA014304.1	TEA010684.1		TEA008934.1
TEA017862.1	TEA018316.1		TEA020321.1	TEA014305.1	TEA010694.1		TEA008946.1
TEA017910.1	TEA018325.1		TEA020473.1	TEA014360.1	TEA010702.1		TEA008956.1
TEA017912.1	TEA018442.1		TEA020491.1	TEA014387.1	TEA010715.1		TEA008958.1
TEA017999.1	TEA018444.1		TEA020516.1	TEA014409.1	TEA010732.1		TEA008963.1
TEA018039.1	TEA018553.1		TEA020545.1	TEA014420.1	TEA010747.1		TEA008974.1
TEA018072.1	TEA018554.1		TEA020574.1	TEA014448.1	TEA010780.1		TEA008995.1
TEA018078.1	TEA018589.1		TEA020590.1	TEA014458.1	TEA010789.1		TEA009012.1
TEA018122.1	TEA018664.1		TEA020609.1	TEA014560.1	TEA010797.1		TEA009044.1
TEA018136.1	TEA018686.1		TEA020631.1	TEA014566.1	TEA010825.1		TEA009048.1
TEA018197.1	TEA018703.1		TEA020634.1	TEA014583.1	TEA010834.1		TEA009085.1
TEA018206.1	TEA018749.1		TEA020682.1	TEA014606.1	TEA010839.1		TEA009151.1
TEA018219.1	TEA018753.1		TEA020711.1	TEA014619.1	TEA010843.1		TEA009175.1
TEA018280.1	TEA018771.1		TEA020721.1	TEA014645.1	TEA010846.1		TEA009194.1
TEA018294.1	TEA018780.1		TEA020772.1	TEA014706.1	TEA010849.1		TEA009271.1
TEA018340.1	TEA018806.1		TEA020851.1	TEA014712.1	TEA010862.1		TEA009289.1
TEA018345.1	TEA018831.1		TEA020852.1	TEA014728.1	TEA010864.1		TEA009297.1
TEA018360.1	TEA018892.1		TEA020915.1	TEA014816.1	TEA010887.1		TEA009353.1
TEA018366.1	TEA018913.1		TEA021016.1	TEA014828.1	TEA010901.1		TEA009362.1
TEA018375.1	TEA018947.1		TEA021043.1	TEA014879.1	TEA010907.1		TEA009371.1
TEA018399.1	TEA018950.1		TEA021045.1	TEA014889.1	TEA010916.1		TEA009400.1
TEA018406.1	TEA018995.1		TEA021057.1	TEA014915.1	TEA010980.1		TEA009443.1
TEA018446.1	TEA019016.1		TEA021115.1	TEA014944.1	TEA011006.1		TEA009452.1
TEA018463.1	TEA019030.1		TEA021195.1	TEA014945.1	TEA011025.1		TEA009467.1
TEA018477.1	TEA019039.1		TEA021204.1	TEA014977.1	TEA011049.1		TEA009523.1
TEA018480.1	TEA019093.1		TEA021244.1	TEA014991.1	TEA011097.1		TEA009544.1
TEA018539.1	TEA019129.1		TEA021270.1	TEA015022.1	TEA011114.1		TEA009588.1
TEA018572.1	TEA019185.1		TEA021294.1	TEA015047.1	TEA011120.1		TEA009595.1
TEA018638.1	TEA019201.1		TEA021345.1	TEA015066.1	TEA011128.1		TEA009600.1
TEA018694.1	TEA019250.1		TEA021508.1	TEA015071.1	TEA011176.1		TEA009615.1
TEA018714.1	TEA019309.1		TEA021519.1	TEA015072.1	TEA011221.1		TEA009628.1
TEA018726.1	TEA019335.1		TEA021525.1	TEA015116.1	TEA011226.1		TEA009646.1
TEA018809.1	TEA019357.1		TEA021676.1	TEA015146.1	TEA011239.1		TEA009770.1
TEA018832.1	TEA019388.1		TEA021736.1	TEA015155.1	TEA011290.1		TEA009771.1
TEA018838.1	TEA019437.1		TEA021787.1	TEA015166.1	TEA011292.1		TEA009785.1
TEA018906.1	TEA019457.1		TEA021789.1	TEA015192.1	TEA011296.1		TEA009803.1
TEA018935.1	TEA019477.1		TEA021814.1	TEA015237.1	TEA011325.1		TEA009818.1
TEA018978.1	TEA019478.1		TEA021834.1	TEA015274.1	TEA011346.1		TEA009825.1
TEA019022.1	TEA019486.1		TEA021837.1	TEA015306.1	TEA011372.1		TEA009840.1
TEA019037.1	TEA019489.1		TEA021874.1	TEA015330.1	TEA011436.1		TEA009849.1
TEA019065.1	TEA019500.1		TEA021880.1	TEA015407.1	TEA011457.1		TEA009893.1
TEA019118.1	TEA019562.1		TEA021881.1	TEA015440.1	TEA011472.1		TEA009894.1
TEA019135.1	TEA019617.1		TEA021908.1	TEA015534.1	TEA011482.1		TEA009925.1
TEA019193.1	TEA019675.1		TEA021980.1	TEA015535.1	TEA011488.1		TEA009950.1
TEA019213.1	TEA019684.1		TEA022030.1	TEA015552.1	TEA011507.1		TEA009998.1
TEA019226.1	TEA019699.1		TEA022091.1	TEA015611.1	TEA011528.1		TEA010016.1
TEA019233.1	TEA019839.1		TEA022172.1	TEA015640.1	TEA011539.1		TEA010040.1
TEA019367.1	TEA019857.1		TEA022191.1	TEA015645.1	TEA011559.1		TEA010041.1
TEA019393.1	TEA019864.1		TEA022237.1	TEA015648.1	TEA011578.1		TEA010046.1
TEA019404.1	TEA019952.1		TEA022398.1	TEA015700.1	TEA011666.1		TEA010053.1
TEA019450.1	TEA019997.1		TEA022449.1	TEA015774.1	TEA011671.1		TEA010068.1
TEA019506.1	TEA020018.1		TEA022488.1	TEA015796.1	TEA011709.1		TEA010087.1
TEA019567.1	TEA020075.1		TEA022563.1	TEA015802.1	TEA011743.1		TEA010088.1
TEA019572.1	TEA020078.1		TEA022635.1	TEA015843.1	TEA011748.1		TEA010091.1
TEA019622.1	TEA020079.1		TEA022647.1	TEA015850.1	TEA011789.1		TEA010119.1
TEA019693.1	TEA020129.1		TEA022663.1	TEA015882.1	TEA011860.1		TEA010127.1
TEA019710.1	TEA020132.1		TEA022705.1	TEA015885.1	TEA011884.1		TEA010129.1
TEA019732.1	TEA020172.1		TEA022721.1	TEA015901.1	TEA011987.1		TEA010155.1
TEA019742.1	TEA020203.1		TEA022753.1	TEA015933.1	TEA012038.1		TEA010173.1
TEA019757.1	TEA020222.1		TEA022767.1	TEA016006.1	TEA012049.1		TEA010189.1
TEA019865.1	TEA020229.1		TEA022777.1	TEA016033.1	TEA012069.1		TEA010201.1
TEA019911.1	TEA020254.1		TEA022778.1	TEA016057.1	TEA012105.1		TEA010237.1
TEA019943.1	TEA020311.1		TEA022795.1	TEA016084.1	TEA012147.1		TEA010239.1
TEA020000.1	TEA020445.1		TEA022803.1	TEA016088.1	TEA012179.1		TEA010261.1
TEA020035.1	TEA020449.1		TEA022808.1	TEA016103.1	TEA012188.1		TEA010278.1
TEA020054.1	TEA020451.1		TEA022988.1	TEA016138.1	TEA012202.1		TEA010284.1
TEA020093.1	TEA020460.1		TEA023019.1	TEA016160.1	TEA012235.1		TEA010291.1
TEA020095.1	TEA020482.1		TEA023044.1	TEA016266.1	TEA012239.1		TEA010319.1
TEA020118.1	TEA020532.1		TEA023142.1	TEA016280.1	TEA012276.1		TEA010412.1
TEA020179.1	TEA020553.1		TEA023143.1	TEA016336.1	TEA012345.1		TEA010433.1
TEA020236.1	TEA020643.1		TEA023265.1	TEA016345.1	TEA012363.1		TEA010469.1
TEA020253.1	TEA020667.1		TEA023317.1	TEA016455.1	TEA012366.1		TEA010479.1
TEA020378.1	TEA020749.1		TEA023327.1	TEA016529.1	TEA012367.1		TEA010482.1
TEA020479.1	TEA020750.1		TEA023361.1	TEA016564.1	TEA012374.1		TEA010504.1
TEA020498.1	TEA020753.1		TEA023364.1	TEA016612.1	TEA012385.1		TEA010507.1
TEA020509.1	TEA020813.1		TEA023377.1	TEA016621.1	TEA012402.1		TEA010523.1
TEA020546.1	TEA020904.1		TEA023407.1	TEA016628.1	TEA012418.1		TEA010552.1
TEA020604.1	TEA020933.1		TEA023418.1	TEA016676.1	TEA012423.1		TEA010554.1
TEA020683.1	TEA020956.1		TEA023422.1	TEA016677.1	TEA012426.1		TEA010572.1
TEA020731.1	TEA020962.1		TEA023493.1	TEA016702.1	TEA012430.1		TEA010595.1
TEA020737.1	TEA020978.1		TEA023579.1	TEA016727.1	TEA012437.1		TEA010607.1
TEA020789.1	TEA021093.1		TEA023631.1	TEA016735.1	TEA012444.1		TEA010634.1
TEA020793.1	TEA021144.1		TEA023644.1	TEA016748.1	TEA012490.1		TEA010657.1
TEA020812.1	TEA021225.1		TEA023699.1	TEA016803.1	TEA012549.1		TEA010659.1
TEA020826.1	TEA021236.1		TEA023766.1	TEA016900.1	TEA012610.1		TEA010688.1
TEA020867.1	TEA021260.1		TEA023773.1	TEA016912.1	TEA012622.1		TEA010721.1
TEA020973.1	TEA021283.1		TEA023814.1	TEA016953.1	TEA012714.1		TEA010738.1
TEA020986.1	TEA021286.1		TEA023838.1	TEA016979.1	TEA012716.1		TEA010760.1
TEA021050.1	TEA021394.1		TEA023844.1	TEA017060.1	TEA012751.1		TEA010777.1
TEA021060.1	TEA021414.1		TEA023861.1	TEA017064.1	TEA012841.1		TEA010801.1
TEA021078.1	TEA021437.1		TEA023914.1	TEA017087.1	TEA012843.1		TEA010819.1
TEA021113.1	TEA021487.1		TEA023933.1	TEA017179.1	TEA012865.1		TEA010822.1
TEA021184.1	TEA021547.1		TEA023956.1	TEA017184.1	TEA012919.1		TEA010875.1
TEA021198.1	TEA021581.1		TEA023973.1	TEA017187.1	TEA012933.1		TEA010883.1
TEA021247.1	TEA021605.1		TEA023996.1	TEA017200.1	TEA012957.1		TEA010896.1
TEA021274.1	TEA021614.1		TEA024020.1	TEA017230.1	TEA012970.1		TEA010898.1
TEA021291.1	TEA021659.1		TEA024021.1	TEA017264.1	TEA012984.1		TEA010902.1
TEA021336.1	TEA021740.1		TEA024051.1	TEA017279.1	TEA013034.1		TEA010903.1
TEA021361.1	TEA021853.1		TEA024056.1	TEA017292.1	TEA013047.1		TEA010914.1
TEA021384.1	TEA021890.1		TEA024072.1	TEA017351.1	TEA013058.1		TEA010988.1
TEA021430.1	TEA021930.1		TEA024078.1	TEA017399.1	TEA013059.1		TEA010994.1
TEA021431.1	TEA021936.1		TEA024095.1	TEA017435.1	TEA013064.1		TEA011002.1
TEA021436.1	TEA021942.1		TEA024171.1	TEA017503.1	TEA013089.1		TEA011018.1
TEA021453.1	TEA022043.1		TEA024317.1	TEA017518.1	TEA013116.1		TEA011020.1
TEA021456.1	TEA022070.1		TEA024333.1	TEA017524.1	TEA013124.1		TEA011072.1
TEA021496.1	TEA022102.1		TEA024335.1	TEA017596.1	TEA013135.1		TEA011108.1
TEA021524.1	TEA022145.1		TEA024373.1	TEA017623.1	TEA013154.1		TEA011156.1
TEA021662.1	TEA022182.1		TEA024384.1	TEA017638.1	TEA013238.1		TEA011165.1
TEA021702.1	TEA022204.1		TEA024392.1	TEA017662.1	TEA013240.1		TEA011180.1
TEA021715.1	TEA022215.1		TEA024467.1	TEA017666.1	TEA013252.1		TEA011181.1
TEA021752.1	TEA022223.1		TEA024476.1	TEA017667.1	TEA013258.1		TEA011224.1
TEA021764.1	TEA022265.1		TEA024522.1	TEA017690.1	TEA013261.1		TEA011295.1
TEA021770.1	TEA022299.1		TEA024541.1	TEA017718.1	TEA013293.1		TEA011297.1
TEA021772.1	TEA022336.1		TEA024543.1	TEA017739.1	TEA013301.1		TEA011312.1
TEA021909.1	TEA022367.1		TEA024545.1	TEA017778.1	TEA013313.1		TEA011329.1
TEA021932.1	TEA022392.1		TEA024574.1	TEA017803.1	TEA013343.1		TEA011354.1
TEA021933.1	TEA022431.1		TEA024625.1	TEA017815.1	TEA013431.1		TEA011355.1
TEA021961.1	TEA022440.1		TEA024646.1	TEA017892.1	TEA013457.1		TEA011382.1
TEA022002.1	TEA022464.1		TEA024678.1	TEA017899.1	TEA013465.1		TEA011383.1
TEA022097.1	TEA022480.1		TEA024944.1	TEA017900.1	TEA013471.1		TEA011415.1
TEA022124.1	TEA022502.1		TEA024969.1	TEA017907.1	TEA013477.1		TEA011462.1
TEA022141.1	TEA022506.1		TEA024985.1	TEA017908.1	TEA013480.1		TEA011469.1
TEA022200.1	TEA022592.1		TEA025007.1	TEA017923.1	TEA013497.1		TEA011529.1
TEA022236.1	TEA022658.1		TEA025022.1	TEA018002.1	TEA013547.1		TEA011547.1
TEA022241.1	TEA022699.1		TEA025155.1	TEA018008.1	TEA013591.1		TEA011570.1
TEA022244.1	TEA022742.1		TEA025164.1	TEA018020.1	TEA013592.1		TEA011613.1
TEA022287.1	TEA022763.1		TEA025194.1	TEA018053.1	TEA013614.1		TEA011646.1
TEA022304.1	TEA022846.1		TEA025201.1	TEA018056.1	TEA013645.1		TEA011647.1
TEA022308.1	TEA022897.1		TEA025513.1	TEA018089.1	TEA013651.1		TEA011701.1
TEA022343.1	TEA022964.1		TEA025518.1	TEA018138.1	TEA013662.1		TEA011751.1
TEA022352.1	TEA022999.1		TEA025522.1	TEA018143.1	TEA013669.1		TEA011756.1
TEA022364.1	TEA023008.1		TEA025523.1	TEA018163.1	TEA013681.1		TEA011768.1
TEA022498.1	TEA023041.1		TEA025524.1	TEA018279.1	TEA013745.1		TEA011771.1
TEA022510.1	TEA023081.1		TEA025532.1	TEA018303.1	TEA013766.1		TEA011774.1
TEA022521.1	TEA023092.1		TEA025627.1	TEA018319.1	TEA013781.1		TEA011792.1
TEA022560.1	TEA023094.1		TEA025712.1	TEA018324.1	TEA013797.1		TEA011797.1
TEA022567.1	TEA023106.1		TEA025744.1	TEA018352.1	TEA013833.1		TEA011798.1
TEA022587.1	TEA023173.1		TEA025746.1	TEA018357.1	TEA013837.1		TEA011826.1
TEA022622.1	TEA023176.1		TEA025762.1	TEA018380.1	TEA013844.1		TEA011827.1
TEA022640.1	TEA023210.1		TEA025779.1	TEA018388.1	TEA013853.1		TEA011829.1
TEA022681.1	TEA023273.1		TEA025809.1	TEA018426.1	TEA013870.1		TEA011843.1
TEA022683.1	TEA023305.1		TEA025821.1	TEA018434.1	TEA013879.1		TEA011856.1
TEA022686.1	TEA023344.1		TEA025822.1	TEA018437.1	TEA014040.1		TEA011890.1
TEA022690.1	TEA023463.1		TEA025823.1	TEA018526.1	TEA014041.1		TEA011915.1
TEA022696.1	TEA023465.1		TEA025844.1	TEA018595.1	TEA014055.1		TEA011923.1
TEA022701.1	TEA023480.1		TEA025900.1	TEA018616.1	TEA014105.1		TEA011938.1
TEA022712.1	TEA023515.1		TEA026003.1	TEA018661.1	TEA014139.1		TEA011966.1
TEA022713.1	TEA023622.1		TEA026012.1	TEA018698.1	TEA014143.1		TEA011979.1
TEA022734.1	TEA023642.1		TEA026030.1	TEA018699.1	TEA014176.1		TEA011980.1
TEA022750.1	TEA023651.1		TEA026040.1	TEA018719.1	TEA014224.1		TEA012013.1
TEA022751.1	TEA023676.1		TEA026147.1	TEA018722.1	TEA014261.1		TEA012026.1
TEA022754.1	TEA023718.1		TEA026158.1	TEA018736.1	TEA014317.1		TEA012034.1
TEA022772.1	TEA023754.1		TEA026188.1	TEA018745.1	TEA014340.1		TEA012035.1
TEA022814.1	TEA023827.1		TEA026194.1	TEA018763.1	TEA014354.1		TEA012093.1
TEA022819.1	TEA023888.1		TEA026204.1	TEA018811.1	TEA014407.1		TEA012100.1
TEA022905.1	TEA023941.1		TEA026263.1	TEA018837.1	TEA014411.1		TEA012141.1
TEA022917.1	TEA024137.1		TEA026266.1	TEA018866.1	TEA014412.1		TEA012190.1
TEA022926.1	TEA024151.1		TEA026301.1	TEA018896.1	TEA014419.1		TEA012195.1
TEA022939.1	TEA024199.1		TEA026314.1	TEA018904.1	TEA014428.1		TEA012214.1
TEA023049.1	TEA024416.1		TEA026315.1	TEA018917.1	TEA014472.1		TEA012217.1
TEA023077.1	TEA024417.1		TEA026348.1	TEA018918.1	TEA014497.1		TEA012247.1
TEA023078.1	TEA024451.1		TEA026349.1	TEA018959.1	TEA014504.1		TEA012251.1
TEA023095.1	TEA024566.1		TEA026441.1	TEA018971.1	TEA014519.1		TEA012257.1
TEA023136.1	TEA024575.1		TEA026515.1	TEA019033.1	TEA014559.1		TEA012308.1
TEA023209.1	TEA024649.1		TEA026591.1	TEA019045.1	TEA014598.1		TEA012339.1
TEA023222.1	TEA024685.1		TEA026595.1	TEA019079.1	TEA014609.1		TEA012341.1
TEA023230.1	TEA024693.1		TEA026619.1	TEA019081.1	TEA014617.1		TEA012354.1
TEA023244.1	TEA024718.1		TEA026631.1	TEA019142.1	TEA014621.1		TEA012427.1
TEA023307.1	TEA024771.1		TEA026703.1	TEA019199.1	TEA014649.1		TEA012428.1
TEA023387.1	TEA024848.1		TEA026715.1	TEA019258.1	TEA014662.1		TEA012442.1
TEA023404.1	TEA024877.1		TEA026742.1	TEA019264.1	TEA014687.1		TEA012469.1
TEA023508.1	TEA024924.1		TEA026745.1	TEA019289.1	TEA014699.1		TEA012471.1
TEA023564.1	TEA024931.1		TEA026750.1	TEA019330.1	TEA014753.1		TEA012473.1
TEA023592.1	TEA024936.1		TEA026811.1	TEA019351.1	TEA014779.1		TEA012476.1
TEA023599.1	TEA025026.1		TEA026834.1	TEA019394.1	TEA014798.1		TEA012483.1
TEA023619.1	TEA025034.1		TEA026846.1	TEA019487.1	TEA014820.1		TEA012487.1
TEA023653.1	TEA025066.1		TEA026862.1	TEA019505.1	TEA014821.1		TEA012498.1
TEA023717.1	TEA025167.1		TEA026872.1	TEA019520.1	TEA014862.1		TEA012503.1
TEA023817.1	TEA025295.1		TEA026882.1	TEA019543.1	TEA014871.1		TEA012538.1
TEA023822.1	TEA025330.1		TEA026884.1	TEA019605.1	TEA014880.1		TEA012543.1
TEA023848.1	TEA025382.1		TEA027012.1	TEA019615.1	TEA014894.1		TEA012593.1
TEA023870.1	TEA025405.1		TEA027076.1	TEA019697.1	TEA015052.1		TEA012649.1
TEA023891.1	TEA025545.1		TEA027083.1	TEA019814.1	TEA015077.1		TEA012658.1
TEA023907.1	TEA025594.1		TEA027122.1	TEA019818.1	TEA015100.1		TEA012675.1
TEA023918.1	TEA025611.1		TEA027202.1	TEA019823.1	TEA015124.1		TEA012694.1
TEA023938.1	TEA025683.1		TEA027208.1	TEA019851.1	TEA015160.1		TEA012718.1
TEA023954.1	TEA025702.1		TEA027212.1	TEA019874.1	TEA015195.1		TEA012767.1
TEA023963.1	TEA025709.1		TEA027312.1	TEA019886.1	TEA015196.1		TEA012773.1
TEA023976.1	TEA025714.1		TEA027314.1	TEA019888.1	TEA015203.1		TEA012845.1
TEA023977.1	TEA025715.1		TEA027319.1	TEA019890.1	TEA015222.1		TEA012899.1
TEA024045.1	TEA025734.1		TEA027330.1	TEA019898.1	TEA015251.1		TEA012922.1
TEA024123.1	TEA025739.1		TEA027424.1	TEA019900.1	TEA015265.1		TEA012929.1
TEA024135.1	TEA025741.1		TEA027430.1	TEA019905.1	TEA015278.1		TEA012953.1
TEA024202.1	TEA025761.1		TEA027454.1	TEA020021.1	TEA015327.1		TEA012955.1
TEA024229.1	TEA025768.1		TEA027536.1	TEA020029.1	TEA015345.1		TEA012966.1
TEA024230.1	TEA025834.1		TEA027572.1	TEA020060.1	TEA015377.1		TEA012974.1
TEA024245.1	TEA025865.1		TEA027584.1	TEA020087.1	TEA015443.1		TEA012976.1
TEA024280.1	TEA025870.1		TEA027597.1	TEA020126.1	TEA015503.1		TEA012985.1
TEA024371.1	TEA025950.1		TEA027736.1	TEA020295.1	TEA015506.1		TEA012989.1
TEA024381.1	TEA025963.1		TEA027739.1	TEA020298.1	TEA015545.1		TEA013076.1
TEA024397.1	TEA025980.1		TEA027749.1	TEA020332.1	TEA015563.1		TEA013121.1
TEA024399.1	TEA025988.1		TEA027752.1	TEA020355.1	TEA015636.1		TEA013143.1
TEA024412.1	TEA026005.1		TEA027771.1	TEA020404.1	TEA015650.1		TEA013159.1
TEA024433.1	TEA026070.1		TEA027821.1	TEA020418.1	TEA015682.1		TEA013161.1
TEA024492.1	TEA026075.1		TEA027911.1	TEA020422.1	TEA015691.1		TEA013198.1
TEA024518.1	TEA026089.1		TEA027920.1	TEA020457.1	TEA015722.1		TEA013200.1
TEA024584.1	TEA026097.1		TEA027929.1	TEA020530.1	TEA015725.1		TEA013203.1
TEA024642.1	TEA026104.1		TEA027933.1	TEA020531.1	TEA015733.1		TEA013216.1
TEA024675.1	TEA026150.1		TEA027960.1	TEA020671.1	TEA015735.1		TEA013256.1
TEA024692.1	TEA026152.1		TEA027984.1	TEA020728.1	TEA015758.1		TEA013276.1
TEA024796.1	TEA026190.1		TEA028029.1	TEA020757.1	TEA015773.1		TEA013316.1
TEA024797.1	TEA026208.1		TEA028037.1	TEA020758.1	TEA015791.1		TEA013320.1
TEA024806.1	TEA026275.1		TEA028038.1	TEA020770.1	TEA015807.1		TEA013332.1
TEA024920.1	TEA026338.1		TEA028039.1	TEA020791.1	TEA015839.1		TEA013355.1
TEA024929.1	TEA026370.1		TEA028067.1	TEA020853.1	TEA015846.1		TEA013357.1
TEA024945.1	TEA026434.1		TEA028184.1	TEA020917.1	TEA015857.1		TEA013358.1
TEA024997.1	TEA026458.1		TEA028187.1	TEA020996.1	TEA015876.1		TEA013360.1
TEA025091.1	TEA026470.1		TEA028195.1	TEA021001.1	TEA015889.1		TEA013391.1
TEA025139.1	TEA026479.1		TEA028214.1	TEA021036.1	TEA015897.1		TEA013397.1
TEA025228.1	TEA026480.1		TEA028249.1	TEA021071.1	TEA015917.1		TEA013407.1
TEA025279.1	TEA026488.1		TEA028281.1	TEA021083.1	TEA015951.1		TEA013427.1
TEA025306.1	TEA026518.1		TEA028326.1	TEA021106.1	TEA015983.1		TEA013448.1
TEA025363.1	TEA026522.1		TEA028329.1	TEA021116.1	TEA015992.1		TEA013474.1
TEA025552.1	TEA026536.1		TEA028356.1	TEA021250.1	TEA016005.1		TEA013486.1
TEA025633.1	TEA026561.1		TEA028375.1	TEA021263.1	TEA016074.1		TEA013500.1
TEA025639.1	TEA026663.1		TEA028396.1	TEA021312.1	TEA016075.1		TEA013504.1
TEA025725.1	TEA026707.1		TEA028476.1	TEA021319.1	TEA016081.1		TEA013530.1
TEA025840.1	TEA026744.1		TEA028505.1	TEA021340.1	TEA016094.1		TEA013553.1
TEA025874.1	TEA026755.1		TEA028508.1	TEA021356.1	TEA016095.1		TEA013583.1
TEA025905.1	TEA026794.1		TEA028514.1	TEA021424.1	TEA016156.1		TEA013605.1
TEA025924.1	TEA026800.1		TEA028549.1	TEA021523.1	TEA016158.1		TEA013609.1
TEA025929.1	TEA026868.1		TEA028599.1	TEA021579.1	TEA016238.1		TEA013616.1
TEA025937.1	TEA026886.1		TEA028615.1	TEA021586.1	TEA016240.1		TEA013740.1
TEA025947.1	TEA026923.1		TEA028789.1	TEA021651.1	TEA016271.1		TEA013750.1
TEA025976.1	TEA027075.1		TEA028959.1	TEA021672.1	TEA016288.1		TEA013811.1
TEA026123.1	TEA027178.1		TEA028990.1	TEA021732.1	TEA016353.1		TEA013832.1
TEA026172.1	TEA027232.1		TEA028995.1	TEA021741.1	TEA016361.1		TEA013847.1
TEA026209.1	TEA027246.1		TEA029010.1	TEA021778.1	TEA016410.1		TEA013865.1
TEA026218.1	TEA027317.1		TEA029028.1	TEA021780.1	TEA016436.1		TEA013873.1
TEA026240.1	TEA027335.1		TEA029102.1	TEA021798.1	TEA016482.1		TEA013904.1
TEA026288.1	TEA027398.1		TEA029113.1	TEA021858.1	TEA016487.1		TEA013924.1
TEA026476.1	TEA027400.1		TEA029129.1	TEA021862.1	TEA016497.1		TEA013975.1
TEA026477.1	TEA027404.1		TEA029252.1	TEA021887.1	TEA016509.1		TEA013986.1
TEA026530.1	TEA027447.1		TEA029336.1	TEA021911.1	TEA016517.1		TEA013996.1
TEA026531.1	TEA027511.1		TEA029393.1	TEA021913.1	TEA016527.1		TEA014015.1
TEA026559.1	TEA027569.1		TEA029410.1	TEA022033.1	TEA016611.1		TEA014016.1
TEA026592.1	TEA027627.1		TEA029423.1	TEA022047.1	TEA016646.1		TEA014028.1
TEA026615.1	TEA027650.1		TEA029513.1	TEA022113.1	TEA016649.1		TEA014033.1
TEA026637.1	TEA027671.1		TEA029524.1	TEA022159.1	TEA016723.1		TEA014035.1
TEA026655.1	TEA027691.1		TEA029597.1	TEA022187.1	TEA016754.1		TEA014067.1
TEA026665.1	TEA027708.1		TEA029598.1	TEA022359.1	TEA016767.1		TEA014070.1
TEA026675.1	TEA027723.1		TEA029605.1	TEA022371.1	TEA016844.1		TEA014099.1
TEA026681.1	TEA027810.1		TEA029615.1	TEA022383.1	TEA016845.1		TEA014137.1
TEA026737.1	TEA027819.1		TEA029655.1	TEA022399.1	TEA016870.1		TEA014169.1
TEA026777.1	TEA027942.1		TEA029675.1	TEA022426.1	TEA016922.1		TEA014175.1
TEA026848.1	TEA028082.1		TEA029713.1	TEA022489.1	TEA016940.1		TEA014210.1
TEA026876.1	TEA028093.1		TEA029777.1	TEA022496.1	TEA016957.1		TEA014282.1
TEA026881.1	TEA028102.1		TEA029784.1	TEA022504.1	TEA016977.1		TEA014314.1
TEA026915.1	TEA028175.1		TEA029808.1	TEA022509.1	TEA016984.1		TEA014336.1
TEA026957.1	TEA028204.1		TEA029823.1	TEA022547.1	TEA016999.1		TEA014345.1
TEA026984.1	TEA028232.1		TEA029856.1	TEA022548.1	TEA017002.1		TEA014357.1
TEA027058.1	TEA028272.1		TEA029858.1	TEA022552.1	TEA017011.1		TEA014362.1
TEA027097.1	TEA028292.1		TEA030034.1	TEA022597.1	TEA017038.1		TEA014373.1
TEA027120.1	TEA028334.1		TEA030056.1	TEA022633.1	TEA017068.1		TEA014427.1
TEA027131.1	TEA028335.1		TEA030078.1	TEA022634.1	TEA017081.1		TEA014450.1
TEA027132.1	TEA028361.1		TEA030190.1	TEA022645.1	TEA017097.1		TEA014454.1
TEA027187.1	TEA028382.1		TEA030193.1	TEA022732.1	TEA017128.1		TEA014456.1
TEA027220.1	TEA028399.1		TEA030196.1	TEA022875.1	TEA017171.1		TEA014492.1
TEA027267.1	TEA028406.1		TEA030202.1	TEA022879.1	TEA017206.1		TEA014500.1
TEA027296.1	TEA028419.1		TEA030319.1	TEA022887.1	TEA017218.1		TEA014506.1
TEA027323.1	TEA028424.1		TEA030331.1	TEA022890.1	TEA017219.1		TEA014579.1
TEA027375.1	TEA028486.1		TEA030398.1	TEA022936.1	TEA017232.1		TEA014596.1
TEA027387.1	TEA028497.1		TEA030404.1	TEA022958.1	TEA017326.1		TEA014634.1
TEA027397.1	TEA028547.1		TEA030463.1	TEA022962.1	TEA017349.1		TEA014665.1
TEA027407.1	TEA028572.1		TEA030471.1	TEA023043.1	TEA017372.1		TEA014735.1
TEA027410.1	TEA028581.1		TEA030546.1	TEA023070.1	TEA017379.1		TEA014757.1
TEA027413.1	TEA028609.1		TEA030578.1	TEA023086.1	TEA017404.1		TEA014767.1
TEA027457.1	TEA028667.1		TEA030618.1	TEA023105.1	TEA017413.1		TEA014771.1
TEA027467.1	TEA028712.1		TEA030629.1	TEA023113.1	TEA017418.1		TEA014786.1
TEA027528.1	TEA028755.1		TEA030727.1	TEA023157.1	TEA017423.1		TEA014851.1
TEA027537.1	TEA028773.1		TEA030740.1	TEA023171.1	TEA017460.1		TEA014885.1
TEA027638.1	TEA028782.1		TEA030749.1	TEA023257.1	TEA017493.1		TEA014890.1
TEA027672.1	TEA028783.1		TEA030769.1	TEA023292.1	TEA017499.1		TEA014953.1
TEA027730.1	TEA028800.1		TEA030795.1	TEA023308.1	TEA017513.1		TEA014960.1
TEA027774.1	TEA028820.1		TEA030826.1	TEA023367.1	TEA017529.1		TEA014983.1
TEA027780.1	TEA028829.1		TEA030850.1	TEA023396.1	TEA017539.1		TEA014989.1
TEA027783.1	TEA028838.1		TEA030854.1	TEA023397.1	TEA017574.1		TEA014997.1
TEA027852.1	TEA028865.1		TEA030905.1	TEA023454.1	TEA017578.1		TEA015012.1
TEA027902.1	TEA028868.1		TEA030906.1	TEA023459.1	TEA017584.1		TEA015070.1
TEA027912.1	TEA028889.1		TEA030955.1	TEA023479.1	TEA017595.1		TEA015080.1
TEA027941.1	TEA029034.1		TEA030980.1	TEA023499.1	TEA017605.1		TEA015082.1
TEA027983.1	TEA029059.1		TEA031000.1	TEA023537.1	TEA017607.1		TEA015110.1
TEA028020.1	TEA029078.1		TEA031004.1	TEA023585.1	TEA017703.1		TEA015127.1
TEA028030.1	TEA029095.1		TEA031147.1	TEA023603.1	TEA017720.1		TEA015184.1
TEA028035.1	TEA029099.1		TEA031171.1	TEA023620.1	TEA017725.1		TEA015249.1
TEA028040.1	TEA029163.1		TEA031184.1	TEA023636.1	TEA017731.1		TEA015266.1
TEA028069.1	TEA029184.1		TEA031241.1	TEA023645.1	TEA017743.1		TEA015272.1
TEA028090.1	TEA029194.1		TEA031254.1	TEA023647.1	TEA017759.1		TEA015279.1
TEA028202.1	TEA029196.1		TEA031299.1	TEA023781.1	TEA017801.1		TEA015287.1
TEA028250.1	TEA029273.1		TEA031339.1	TEA023792.1	TEA017813.1		TEA015309.1
TEA028470.1	TEA029332.1		TEA031452.1	TEA023794.1	TEA017814.1		TEA015320.1
TEA028634.1	TEA029350.1		TEA031506.1	TEA023799.1	TEA017835.1		TEA015346.1
TEA028652.1	TEA029356.1		TEA031621.1	TEA023800.1	TEA017853.1		TEA015388.1
TEA028655.1	TEA029452.1		TEA031643.1	TEA023804.1	TEA017882.1		TEA015398.1
TEA028671.1	TEA029476.1		TEA031646.1	TEA023826.1	TEA017883.1		TEA015403.1
TEA028697.1	TEA029520.1		TEA031666.1	TEA023855.1	TEA017896.1		TEA015411.1
TEA028702.1	TEA029541.1		TEA031845.1	TEA023858.1	TEA017916.1		TEA015436.1
TEA028717.1	TEA029562.1		TEA031881.1	TEA023860.1	TEA017925.1		TEA015452.1
TEA028745.1	TEA029591.1		TEA031891.1	TEA023949.1	TEA017956.1		TEA015490.1
TEA028753.1	TEA029621.1		TEA031907.1	TEA023962.1	TEA017992.1		TEA015500.1
TEA028772.1	TEA029638.1		TEA031908.1	TEA023991.1	TEA017995.1		TEA015536.1
TEA028877.1	TEA029813.1		TEA031918.1	TEA024011.1	TEA018022.1		TEA015575.1
TEA028899.1	TEA029817.1		TEA031948.1	TEA024039.1	TEA018032.1		TEA015588.1
TEA028947.1	TEA029885.1		TEA032058.1	TEA024050.1	TEA018097.1		TEA015590.1
TEA028966.1	TEA029921.1		TEA032106.1	TEA024081.1	TEA018100.1		TEA015653.1
TEA029001.1	TEA029922.1		TEA032134.1	TEA024122.1	TEA018223.1		TEA015668.1
TEA029003.1	TEA030067.1		TEA032149.1	TEA024140.1	TEA018229.1		TEA015704.1
TEA029013.1	TEA030087.1		TEA032173.1	TEA024146.1	TEA018245.1		TEA015729.1
TEA029023.1	TEA030137.1		TEA032324.1	TEA024153.1	TEA018312.1		TEA015736.1
TEA029029.1	TEA030186.1		TEA032567.1	TEA024164.1	TEA018368.1		TEA015738.1
TEA029052.1	TEA030242.1		TEA032577.1	TEA024210.1	TEA018405.1		TEA015749.1
TEA029100.1	TEA030248.1		TEA032599.1	TEA024219.1	TEA018448.1		TEA015768.1
TEA029114.1	TEA030258.1		TEA032915.1	TEA024225.1	TEA018450.1		TEA015784.1
TEA029144.1	TEA030268.1		TEA032917.1	TEA024269.1	TEA018456.1		TEA015792.1
TEA029203.1	TEA030292.1		TEA033024.1	TEA024277.1	TEA018475.1		TEA015795.1
TEA029204.1	TEA030329.1		TEA033069.1	TEA024283.1	TEA018479.1		TEA015848.1
TEA029210.1	TEA030352.1		TEA033070.1	TEA024308.1	TEA018500.1		TEA015892.1
TEA029240.1	TEA030369.1		TEA033078.1	TEA024310.1	TEA018551.1		TEA015908.1
TEA029261.1	TEA030370.1		TEA033102.1	TEA024313.1	TEA018568.1		TEA015925.1
TEA029300.1	TEA030422.1		TEA033106.1	TEA024367.1	TEA018584.1		TEA015946.1
TEA029316.1	TEA030443.1		TEA033124.1	TEA024383.1	TEA018611.1		TEA015967.1
TEA029318.1	TEA030452.1		TEA033137.1	TEA024386.1	TEA018614.1		TEA015973.1
TEA029358.1	TEA030473.1		TEA033447.1	TEA024387.1	TEA018731.1		TEA016002.1
TEA029364.1	TEA030529.1		TEA033448.1	TEA024398.1	TEA018853.1		TEA016023.1
TEA029414.1	TEA030586.1		TEA033491.1	TEA024405.1	TEA018865.1		TEA016024.1
TEA029530.1	TEA030722.1		TEA033493.1	TEA024426.1	TEA018914.1		TEA016034.1
TEA029559.1	TEA030725.1		TEA033515.1	TEA024442.1	TEA018952.1		TEA016040.1
TEA029565.1	TEA030731.1		TEA033520.1	TEA024455.1	TEA019014.1		TEA016042.1
TEA029568.1	TEA030735.1		TEA033527.1	TEA024471.1	TEA019044.1		TEA016049.1
TEA029590.1	TEA030743.1		TEA033593.1	TEA024537.1	TEA019073.1		TEA016083.1
TEA029613.1	TEA030784.1		TEA033674.1	TEA024561.1	TEA019108.1		TEA016091.1
TEA029620.1	TEA030862.1		TEA033677.1	TEA024567.1	TEA019116.1		TEA016207.1
TEA029702.1	TEA030897.1		TEA033683.1	TEA024570.1	TEA019120.1		TEA016248.1
TEA029744.1	TEA030976.1		TEA033687.1	TEA024586.1	TEA019148.1		TEA016275.1
TEA029820.1	TEA031047.1		TEA033690.1	TEA024599.1	TEA019170.1		TEA016292.1
TEA029821.1	TEA031116.1		TEA033806.1	TEA024632.1	TEA019192.1		TEA016333.1
TEA029843.1	TEA031166.1		TEA033824.1	TEA024654.1	TEA019269.1		TEA016375.1
TEA030015.1	TEA031239.1		TEA033860.1	TEA024656.1	TEA019305.1		TEA016425.1
TEA030033.1	TEA031251.1		TEA033874.1	TEA024702.1	TEA019322.1		TEA016428.1
TEA030051.1	TEA031286.1			TEA024778.1	TEA019325.1		TEA016434.1
TEA030066.1	TEA031297.1			TEA024857.1	TEA019334.1		TEA016440.1
TEA030097.1	TEA031366.1			TEA024915.1	TEA019342.1		TEA016441.1
TEA030133.1	TEA031375.1			TEA024926.1	TEA019369.1		TEA016511.1
TEA030149.1	TEA031419.1			TEA024930.1	TEA019379.1		TEA016571.1
TEA030213.1	TEA031457.1			TEA024978.1	TEA019381.1		TEA016579.1
TEA030220.1	TEA031459.1			TEA024980.1	TEA019397.1		TEA016597.1
TEA030279.1	TEA031531.1			TEA025012.1	TEA019475.1		TEA016601.1
TEA030288.1	TEA031691.1			TEA025036.1	TEA019492.1		TEA016605.1
TEA030322.1	TEA031728.1			TEA025039.1	TEA019547.1		TEA016608.1
TEA030381.1	TEA031791.1			TEA025052.1	TEA019551.1		TEA016682.1
TEA030472.1	TEA031827.1			TEA025059.1	TEA019556.1		TEA016683.1
TEA030499.1	TEA031831.1			TEA025071.1	TEA019566.1		TEA016696.1
TEA030570.1	TEA031837.1			TEA025080.1	TEA019577.1		TEA016703.1
TEA030635.1	TEA031932.1			TEA025081.1	TEA019591.1		TEA016704.1
TEA030636.1	TEA031972.1			TEA025218.1	TEA019660.1		TEA016725.1
TEA030648.1	TEA032002.1			TEA025273.1	TEA019680.1		TEA016744.1
TEA030663.1	TEA032033.1			TEA025305.1	TEA019702.1		TEA016800.1
TEA030717.1	TEA032061.1			TEA025351.1	TEA019713.1		TEA016867.1
TEA030738.1	TEA032104.1			TEA025431.1	TEA019749.1		TEA016897.1
TEA030756.1	TEA032111.1			TEA025434.1	TEA019760.1		TEA016942.1
TEA030827.1	TEA032113.1			TEA025517.1	TEA019770.1		TEA016943.1
TEA030963.1	TEA032161.1			TEA025526.1	TEA019787.1		TEA016947.1
TEA031079.1	TEA032165.1			TEA025574.1	TEA019830.1		TEA016952.1
TEA031084.1	TEA032245.1			TEA025580.1	TEA019836.1		TEA016966.1
TEA031095.1	TEA032255.1			TEA025591.1	TEA019838.1		TEA016973.1
TEA031284.1	TEA032293.1			TEA025604.1	TEA019852.1		TEA017004.1
TEA031318.1	TEA032381.1			TEA025723.1	TEA019858.1		TEA017013.1
TEA031374.1	TEA032415.1			TEA025726.1	TEA019877.1		TEA017021.1
TEA031462.1	TEA032456.1			TEA025731.1	TEA019906.1		TEA017033.1
TEA031484.1	TEA032641.1			TEA025796.1	TEA019920.1		TEA017077.1
TEA031502.1	TEA032645.1			TEA025811.1	TEA019936.1		TEA017115.1
TEA031549.1	TEA032659.1			TEA025812.1	TEA019941.1		TEA017118.1
TEA031665.1	TEA032794.1			TEA025827.1	TEA019947.1		TEA017120.1
TEA031679.1	TEA032874.1			TEA025885.1	TEA019954.1		TEA017156.1
TEA031692.1	TEA033000.1			TEA025926.1	TEA019985.1		TEA017167.1
TEA031706.1	TEA033042.1			TEA025954.1	TEA019992.1		TEA017211.1
TEA031723.1	TEA033060.1			TEA025973.1	TEA020009.1		TEA017214.1
TEA031732.1	TEA033110.1			TEA025981.1	TEA020024.1		TEA017222.1
TEA031784.1	TEA033125.1			TEA026022.1	TEA020037.1		TEA017254.1
TEA031802.1	TEA033131.1			TEA026047.1	TEA020051.1		TEA017256.1
TEA031818.1	TEA033200.1			TEA026076.1	TEA020167.1		TEA017270.1
TEA031821.1	TEA033222.1			TEA026120.1	TEA020169.1		TEA017280.1
TEA031909.1	TEA033297.1			TEA026122.1	TEA020197.1		TEA017286.1
TEA031955.1	TEA033315.1			TEA026154.1	TEA020210.1		TEA017289.1
TEA031985.1	TEA033338.1			TEA026167.1	TEA020221.1		TEA017317.1
TEA032067.1	TEA033347.1			TEA026211.1	TEA020225.1		TEA017328.1
TEA032077.1	TEA033454.1			TEA026219.1	TEA020228.1		TEA017363.1
TEA032085.1	TEA033517.1			TEA026221.1	TEA020231.1		TEA017364.1
TEA032108.1	TEA033580.1			TEA026226.1	TEA020234.1		TEA017400.1
TEA032135.1	TEA034016.1			TEA026244.1	TEA020256.1		TEA017407.1
TEA032164.1				TEA026250.1	TEA020275.1		TEA017417.1
TEA032176.1				TEA026297.1	TEA020517.1		TEA017429.1
TEA032177.1				TEA026336.1	TEA020527.1		TEA017438.1
TEA032181.1				TEA026361.1	TEA020645.1		TEA017440.1
TEA032196.1				TEA026373.1	TEA020654.1		TEA017441.1
TEA032199.1				TEA026465.1	TEA020662.1		TEA017473.1
TEA032236.1				TEA026503.1	TEA020678.1		TEA017483.1
TEA032242.1				TEA026504.1	TEA020684.1		TEA017492.1
TEA032356.1				TEA026516.1	TEA020722.1		TEA017505.1
TEA032397.1				TEA026569.1	TEA020724.1		TEA017546.1
TEA032458.1				TEA026601.1	TEA020729.1		TEA017599.1
TEA032473.1				TEA026611.1	TEA020738.1		TEA017604.1
TEA032483.1				TEA026636.1	TEA020759.1		TEA017613.1
TEA032677.1				TEA026687.1	TEA020824.1		TEA017629.1
TEA032770.1				TEA026725.1	TEA020863.1		TEA017635.1
TEA032791.1				TEA026732.1	TEA020865.1		TEA017639.1
TEA032809.1				TEA026772.1	TEA020937.1		TEA017650.1
TEA032844.1				TEA026802.1	TEA020947.1		TEA017688.1
TEA032903.1				TEA026817.1	TEA020969.1		TEA017770.1
TEA032936.1				TEA026844.1	TEA020993.1		TEA017773.1
TEA032961.1				TEA026914.1	TEA020995.1		TEA017783.1
TEA032981.1				TEA026959.1	TEA021049.1		TEA017792.1
TEA033015.1				TEA026986.1	TEA021101.1		TEA017856.1
TEA033044.1				TEA027008.1	TEA021126.1		TEA017857.1
TEA033079.1				TEA027019.1	TEA021140.1		TEA017867.1
TEA033080.1				TEA027028.1	TEA021185.1		TEA017870.1
TEA033133.1				TEA027033.1	TEA021206.1		TEA017871.1
TEA033201.1				TEA027046.1	TEA021239.1		TEA017887.1
TEA033227.1				TEA027052.1	TEA021242.1		TEA017901.1
TEA033278.1				TEA027088.1	TEA021253.1		TEA017930.1
TEA033287.1				TEA027112.1	TEA021268.1		TEA017957.1
TEA033306.1				TEA027128.1	TEA021273.1		TEA017960.1
TEA033384.1				TEA027177.1	TEA021280.1		TEA017973.1
TEA033385.1				TEA027182.1	TEA021298.1		TEA017977.1
TEA033411.1				TEA027209.1	TEA021359.1		TEA018013.1
TEA033423.1				TEA027378.1	TEA021380.1		TEA018018.1
TEA033453.1				TEA027403.1	TEA021381.1		TEA018029.1
TEA033500.1				TEA027432.1	TEA021441.1		TEA018048.1
TEA033526.1				TEA027461.1	TEA021462.1		TEA018095.1
TEA033528.1				TEA027474.1	TEA021478.1		TEA018104.1
TEA033531.1				TEA027485.1	TEA021485.1		TEA018109.1
TEA033542.1				TEA027488.1	TEA021515.1		TEA018119.1
TEA033583.1				TEA027529.1	TEA021532.1		TEA018121.1
TEA033607.1				TEA027543.1	TEA021660.1		TEA018124.1
TEA033662.1				TEA027553.1	TEA021716.1		TEA018174.1
TEA033685.1				TEA027590.1	TEA021723.1		TEA018179.1
TEA033720.1				TEA027610.1	TEA021737.1		TEA018183.1
TEA033758.1				TEA027628.1	TEA021767.1		TEA018192.1
TEA033819.1				TEA027637.1	TEA021794.1		TEA018256.1
TEA033820.1				TEA027707.1	TEA021803.1		TEA018283.1
TEA033850.1				TEA027721.1	TEA021816.1		TEA018288.1
TEA033858.1				TEA027767.1	TEA021835.1		TEA018364.1
TEA033861.1				TEA027788.1	TEA021836.1		TEA018367.1
TEA033871.1				TEA027840.1	TEA021845.1		TEA018400.1
TEA033880.1				TEA027864.1	TEA021851.1		TEA018404.1
TEA033886.1				TEA027866.1	TEA021854.1		TEA018471.1
TEA033890.1				TEA027898.1	TEA021875.1		TEA018588.1
				TEA027908.1	TEA021903.1		TEA018635.1
				TEA027923.1	TEA021910.1		TEA018727.1
				TEA027925.1	TEA022006.1		TEA018741.1
				TEA027931.1	TEA022007.1		TEA018743.1
				TEA027934.1	TEA022034.1		TEA018746.1
				TEA027945.1	TEA022127.1		TEA018748.1
				TEA027950.1	TEA022133.1		TEA018779.1
				TEA027974.1	TEA022166.1		TEA018784.1
				TEA028003.1	TEA022196.1		TEA018793.1
				TEA028021.1	TEA022203.1		TEA018799.1
				TEA028034.1	TEA022220.1		TEA018839.1
				TEA028062.1	TEA022224.1		TEA018883.1
				TEA028085.1	TEA022227.1		TEA018895.1
				TEA028121.1	TEA022246.1		TEA018925.1
				TEA028206.1	TEA022254.1		TEA018928.1
				TEA028310.1	TEA022261.1		TEA018936.1
				TEA028315.1	TEA022274.1		TEA018945.1
				TEA028392.1	TEA022283.1		TEA018965.1
				TEA028411.1	TEA022294.1		TEA018975.1
				TEA028506.1	TEA022342.1		TEA018992.1
				TEA028526.1	TEA022356.1		TEA019001.1
				TEA028550.1	TEA022402.1		TEA019011.1
				TEA028558.1	TEA022425.1		TEA019024.1
				TEA028713.1	TEA022436.1		TEA019041.1
				TEA028737.1	TEA022471.1		TEA019060.1
				TEA028760.1	TEA022500.1		TEA019077.1
				TEA028798.1	TEA022539.1		TEA019098.1
				TEA028827.1	TEA022564.1		TEA019146.1
				TEA028843.1	TEA022569.1		TEA019208.1
				TEA028849.1	TEA022571.1		TEA019292.1
				TEA028883.1	TEA022586.1		TEA019318.1
				TEA028887.1	TEA022618.1		TEA019326.1
				TEA028894.1	TEA022637.1		TEA019338.1
				TEA028920.1	TEA022644.1		TEA019340.1
				TEA028988.1	TEA022654.1		TEA019400.1
				TEA028993.1	TEA022671.1		TEA019456.1
				TEA029025.1	TEA022704.1		TEA019458.1
				TEA029094.1	TEA022755.1		TEA019532.1
				TEA029121.1	TEA022757.1		TEA019609.1
				TEA029135.1	TEA022776.1		TEA019625.1
				TEA029139.1	TEA022817.1		TEA019643.1
				TEA029164.1	TEA022870.1		TEA019659.1
				TEA029167.1	TEA022872.1		TEA019706.1
				TEA029230.1	TEA022895.1		TEA019729.1
				TEA029239.1	TEA022921.1		TEA019753.1
				TEA029243.1	TEA022940.1		TEA019776.1
				TEA029247.1	TEA022951.1		TEA019791.1
				TEA029248.1	TEA022961.1		TEA019792.1
				TEA029362.1	TEA022980.1		TEA019802.1
				TEA029365.1	TEA023057.1		TEA019810.1
				TEA029395.1	TEA023058.1		TEA019848.1
				TEA029404.1	TEA023061.1		TEA019884.1
				TEA029429.1	TEA023089.1		TEA019887.1
				TEA029456.1	TEA023090.1		TEA019894.1
				TEA029483.1	TEA023098.1		TEA019916.1
				TEA029546.1	TEA023107.1		TEA019918.1
				TEA029600.1	TEA023141.1		TEA019958.1
				TEA029614.1	TEA023189.1		TEA019968.1
				TEA029725.1	TEA023190.1		TEA019998.1
				TEA029755.1	TEA023194.1		TEA020034.1
				TEA029756.1	TEA023224.1		TEA020044.1
				TEA029836.1	TEA023241.1		TEA020066.1
				TEA029842.1	TEA023268.1		TEA020135.1
				TEA029846.1	TEA023298.1		TEA020144.1
				TEA029851.1	TEA023320.1		TEA020148.1
				TEA029857.1	TEA023323.1		TEA020164.1
				TEA029865.1	TEA023348.1		TEA020187.1
				TEA029875.1	TEA023384.1		TEA020211.1
				TEA029890.1	TEA023388.1		TEA020223.1
				TEA029899.1	TEA023419.1		TEA020237.1
				TEA029903.1	TEA023430.1		TEA020259.1
				TEA029929.1	TEA023471.1		TEA020314.1
				TEA030094.1	TEA023473.1		TEA020375.1
				TEA030095.1	TEA023482.1		TEA020376.1
				TEA030129.1	TEA023497.1		TEA020401.1
				TEA030146.1	TEA023519.1		TEA020467.1
				TEA030154.1	TEA023520.1		TEA020490.1
				TEA030157.1	TEA023539.1		TEA020505.1
				TEA030162.1	TEA023575.1		TEA020507.1
				TEA030171.1	TEA023582.1		TEA020511.1
				TEA030177.1	TEA023627.1		TEA020518.1
				TEA030210.1	TEA023670.1		TEA020528.1
				TEA030245.1	TEA023692.1		TEA020537.1
				TEA030313.1	TEA023700.1		TEA020538.1
				TEA030356.1	TEA023712.1		TEA020556.1
				TEA030385.1	TEA023728.1		TEA020566.1
				TEA030388.1	TEA023795.1		TEA020595.1
				TEA030399.1	TEA023840.1		TEA020627.1
				TEA030418.1	TEA023867.1		TEA020628.1
				TEA030424.1	TEA023868.1		TEA020630.1
				TEA030447.1	TEA023894.1		TEA020664.1
				TEA030456.1	TEA023951.1		TEA020693.1
				TEA030474.1	TEA023957.1		TEA020697.1
				TEA030497.1	TEA023988.1		TEA020698.1
				TEA030504.1	TEA024004.1		TEA020747.1
				TEA030535.1	TEA024029.1		TEA020831.1
				TEA030573.1	TEA024074.1		TEA020837.1
				TEA030600.1	TEA024094.1		TEA020841.1
				TEA030630.1	TEA024139.1		TEA020858.1
				TEA030662.1	TEA024144.1		TEA020859.1
				TEA030686.1	TEA024149.1		TEA020882.1
				TEA030687.1	TEA024160.1		TEA020888.1
				TEA030702.1	TEA024178.1		TEA020890.1
				TEA030719.1	TEA024179.1		TEA020903.1
				TEA030723.1	TEA024189.1		TEA020923.1
				TEA030737.1	TEA024193.1		TEA020936.1
				TEA030773.1	TEA024248.1		TEA020954.1
				TEA030780.1	TEA024266.1		TEA020968.1
				TEA030804.1	TEA024267.1		TEA021002.1
				TEA030806.1	TEA024284.1		TEA021003.1
				TEA030810.1	TEA024360.1		TEA021015.1
				TEA030817.1	TEA024362.1		TEA021046.1
				TEA030880.1	TEA024389.1		TEA021063.1
				TEA030894.1	TEA024425.1		TEA021095.1
				TEA030907.1	TEA024452.1		TEA021110.1
				TEA030928.1	TEA024456.1		TEA021119.1
				TEA030934.1	TEA024482.1		TEA021122.1
				TEA030981.1	TEA024510.1		TEA021141.1
				TEA030987.1	TEA024520.1		TEA021143.1
				TEA031050.1	TEA024521.1		TEA021172.1
				TEA031112.1	TEA024551.1		TEA021178.1
				TEA031140.1	TEA024557.1		TEA021214.1
				TEA031186.1	TEA024565.1		TEA021218.1
				TEA031188.1	TEA024602.1		TEA021257.1
				TEA031201.1	TEA024614.1		TEA021282.1
				TEA031202.1	TEA024662.1		TEA021304.1
				TEA031203.1	TEA024696.1		TEA021310.1
				TEA031210.1	TEA024726.1		TEA021311.1
				TEA031213.1	TEA024728.1		TEA021322.1
				TEA031217.1	TEA024790.1		TEA021330.1
				TEA031246.1	TEA024818.1		TEA021334.1
				TEA031255.1	TEA024829.1		TEA021338.1
				TEA031282.1	TEA024830.1		TEA021358.1
				TEA031315.1	TEA024838.1		TEA021360.1
				TEA031341.1	TEA024845.1		TEA021368.1
				TEA031370.1	TEA024896.1		TEA021379.1
				TEA031408.1	TEA024901.1		TEA021415.1
				TEA031444.1	TEA024902.1		TEA021422.1
				TEA031453.1	TEA024950.1		TEA021428.1
				TEA031486.1	TEA024963.1		TEA021445.1
				TEA031490.1	TEA024994.1		TEA021454.1
				TEA031499.1	TEA025011.1		TEA021459.1
				TEA031597.1	TEA025027.1		TEA021464.1
				TEA031604.1	TEA025037.1		TEA021468.1
				TEA031664.1	TEA025096.1		TEA021471.1
				TEA031700.1	TEA025108.1		TEA021476.1
				TEA031731.1	TEA025112.1		TEA021503.1
				TEA031734.1	TEA025113.1		TEA021516.1
				TEA031757.1	TEA025129.1		TEA021580.1
				TEA031896.1	TEA025137.1		TEA021609.1
				TEA031954.1	TEA025151.1		TEA021648.1
				TEA032021.1	TEA025195.1		TEA021649.1
				TEA032156.1	TEA025221.1		TEA021694.1
				TEA032201.1	TEA025333.1		TEA021695.1
				TEA032207.1	TEA025365.1		TEA021698.1
				TEA032270.1	TEA025373.1		TEA021712.1
				TEA032278.1	TEA025386.1		TEA021750.1
				TEA032288.1	TEA025394.1		TEA021775.1
				TEA032332.1	TEA025410.1		TEA021782.1
				TEA032352.1	TEA025413.1		TEA021786.1
				TEA032377.1	TEA025432.1		TEA021790.1
				TEA032402.1	TEA025462.1		TEA021792.1
				TEA032407.1	TEA025476.1		TEA021809.1
				TEA032419.1	TEA025487.1		TEA021827.1
				TEA032437.1	TEA025494.1		TEA021842.1
				TEA032444.1	TEA025495.1		TEA021844.1
				TEA032498.1	TEA025496.1		TEA021852.1
				TEA032519.1	TEA025498.1		TEA021859.1
				TEA032570.1	TEA025504.1		TEA021860.1
				TEA032679.1	TEA025541.1		TEA021882.1
				TEA032687.1	TEA025547.1		TEA021886.1
				TEA032692.1	TEA025596.1		TEA021906.1
				TEA032709.1	TEA025626.1		TEA021917.1
				TEA032781.1	TEA025632.1		TEA021927.1
				TEA032829.1	TEA025665.1		TEA021957.1
				TEA032865.1	TEA025743.1		TEA021959.1
				TEA032886.1	TEA025745.1		TEA021966.1
				TEA032979.1	TEA025751.1		TEA021972.1
				TEA033051.1	TEA025758.1		TEA021974.1
				TEA033103.1	TEA025783.1		TEA021975.1
				TEA033159.1	TEA025785.1		TEA021983.1
				TEA033163.1	TEA025803.1		TEA022008.1
				TEA033168.1	TEA025825.1		TEA022019.1
				TEA033199.1	TEA025841.1		TEA022041.1
				TEA033247.1	TEA025856.1		TEA022046.1
				TEA033258.1	TEA025923.1		TEA022054.1
				TEA033304.1	TEA025935.1		TEA022065.1
				TEA033419.1	TEA025962.1		TEA022072.1
				TEA033420.1	TEA025968.1		TEA022098.1
				TEA033469.1	TEA026010.1		TEA022103.1
				TEA033471.1	TEA026018.1		TEA022104.1
				TEA033502.1	TEA026059.1		TEA022138.1
				TEA033574.1	TEA026093.1		TEA022167.1
				TEA033608.1	TEA026133.1		TEA022183.1
				TEA033622.1	TEA026148.1		TEA022217.1
				TEA033679.1	TEA026202.1		TEA022219.1
				TEA033702.1	TEA026228.1		TEA022234.1
				TEA033712.1	TEA026268.1		TEA022247.1
				TEA033744.1	TEA026305.1		TEA022290.1
				TEA033810.1	TEA026406.1		TEA022312.1
				TEA033845.1	TEA026508.1		TEA022315.1
				TEA033848.1	TEA026510.1		TEA022361.1
				TEA033868.1	TEA026511.1		TEA022370.1
				TEA034034.1	TEA026514.1		TEA022397.1
				TEA034041.1	TEA026550.1		TEA022413.1
					TEA026564.1		TEA022424.1
					TEA026581.1		TEA022462.1
					TEA026589.1		TEA022470.1
					TEA026602.1		TEA022483.1
					TEA026618.1		TEA022503.1
					TEA026708.1		TEA022512.1
					TEA026711.1		TEA022536.1
					TEA026734.1		TEA022556.1
					TEA026736.1		TEA022570.1
					TEA026743.1		TEA022593.1
					TEA026764.1		TEA022646.1
					TEA026770.1		TEA022700.1
					TEA026790.1		TEA022735.1
					TEA026850.1		TEA022747.1
					TEA026874.1		TEA022815.1
					TEA026879.1		TEA022860.1
					TEA026901.1		TEA022869.1
					TEA026905.1		TEA022881.1
					TEA026937.1		TEA022902.1
					TEA026945.1		TEA022943.1
					TEA026990.1		TEA022946.1
					TEA027013.1		TEA022963.1
					TEA027017.1		TEA022973.1
					TEA027045.1		TEA022978.1
					TEA027071.1		TEA023003.1
					TEA027081.1		TEA023004.1
					TEA027117.1		TEA023005.1
					TEA027127.1		TEA023017.1
					TEA027150.1		TEA023021.1
					TEA027179.1		TEA023027.1
					TEA027184.1		TEA023063.1
					TEA027214.1		TEA023152.1
					TEA027285.1		TEA023163.1
					TEA027321.1		TEA023168.1
					TEA027396.1		TEA023179.1
					TEA027422.1		TEA023186.1
					TEA027434.1		TEA023199.1
					TEA027440.1		TEA023214.1
					TEA027449.1		TEA023232.1
					TEA027463.1		TEA023242.1
					TEA027503.1		TEA023251.1
					TEA027513.1		TEA023259.1
					TEA027555.1		TEA023274.1
					TEA027581.1		TEA023283.1
					TEA027589.1		TEA023297.1
					TEA027606.1		TEA023329.1
					TEA027607.1		TEA023341.1
					TEA027609.1		TEA023385.1
					TEA027611.1		TEA023405.1
					TEA027639.1		TEA023420.1
					TEA027668.1		TEA023433.1
					TEA027669.1		TEA023436.1
					TEA027670.1		TEA023461.1
					TEA027674.1		TEA023526.1
					TEA027688.1		TEA023544.1
					TEA027695.1		TEA023555.1
					TEA027701.1		TEA023567.1
					TEA027704.1		TEA023587.1
					TEA027718.1		TEA023617.1
					TEA027740.1		TEA023658.1
					TEA027747.1		TEA023668.1
					TEA027750.1		TEA023680.1
					TEA027776.1		TEA023681.1
					TEA027794.1		TEA023702.1
					TEA027841.1		TEA023716.1
					TEA027842.1		TEA023727.1
					TEA027847.1		TEA023746.1
					TEA027854.1		TEA023791.1
					TEA027878.1		TEA023802.1
					TEA027935.1		TEA023813.1
					TEA028050.1		TEA023833.1
					TEA028071.1		TEA023847.1
					TEA028076.1		TEA023857.1
					TEA028081.1		TEA023863.1
					TEA028143.1		TEA023872.1
					TEA028164.1		TEA023882.1
					TEA028169.1		TEA023900.1
					TEA028211.1		TEA023921.1
					TEA028217.1		TEA023928.1
					TEA028234.1		TEA023955.1
					TEA028255.1		TEA024003.1
					TEA028279.1		TEA024026.1
					TEA028282.1		TEA024027.1
					TEA028321.1		TEA024075.1
					TEA028352.1		TEA024096.1
					TEA028357.1		TEA024117.1
					TEA028373.1		TEA024162.1
					TEA028388.1		TEA024163.1
					TEA028500.1		TEA024166.1
					TEA028515.1		TEA024188.1
					TEA028521.1		TEA024209.1
					TEA028545.1		TEA024231.1
					TEA028564.1		TEA024249.1
					TEA028570.1		TEA024255.1
					TEA028595.1		TEA024261.1
					TEA028600.1		TEA024276.1
					TEA028651.1		TEA024278.1
					TEA028661.1		TEA024299.1
					TEA028705.1		TEA024323.1
					TEA028743.1		TEA024350.1
					TEA028809.1		TEA024364.1
					TEA028834.1		TEA024391.1
					TEA028841.1		TEA024404.1
					TEA028846.1		TEA024421.1
					TEA028850.1		TEA024480.1
					TEA028864.1		TEA024579.1
					TEA028871.1		TEA024616.1
					TEA028882.1		TEA024667.1
					TEA028884.1		TEA024714.1
					TEA028895.1		TEA024721.1
					TEA028963.1		TEA024749.1
					TEA029048.1		TEA024761.1
					TEA029098.1		TEA024779.1
					TEA029105.1		TEA024832.1
					TEA029118.1		TEA024854.1
					TEA029168.1		TEA024864.1
					TEA029176.1		TEA024865.1
					TEA029185.1		TEA024869.1
					TEA029197.1		TEA024878.1
					TEA029221.1		TEA024883.1
					TEA029276.1		TEA024895.1
					TEA029303.1		TEA024932.1
					TEA029311.1		TEA024952.1
					TEA029314.1		TEA024960.1
					TEA029369.1		TEA024981.1
					TEA029411.1		TEA024986.1
					TEA029434.1		TEA025001.1
					TEA029438.1		TEA025009.1
					TEA029445.1		TEA025018.1
					TEA029446.1		TEA025076.1
					TEA029471.1		TEA025077.1
					TEA029495.1		TEA025087.1
					TEA029526.1		TEA025089.1
					TEA029550.1		TEA025125.1
					TEA029577.1		TEA025128.1
					TEA029586.1		TEA025153.1
					TEA029588.1		TEA025159.1
					TEA029593.1		TEA025192.1
					TEA029641.1		TEA025215.1
					TEA029659.1		TEA025216.1
					TEA029669.1		TEA025236.1
					TEA029706.1		TEA025246.1
					TEA029717.1		TEA025263.1
					TEA029720.1		TEA025344.1
					TEA029734.1		TEA025353.1
					TEA029742.1		TEA025393.1
					TEA029768.1		TEA025409.1
					TEA029769.1		TEA025427.1
					TEA029805.1		TEA025429.1
					TEA029864.1		TEA025451.1
					TEA029908.1		TEA025456.1
					TEA029923.1		TEA025472.1
					TEA029953.1		TEA025502.1
					TEA029959.1		TEA025563.1
					TEA029982.1		TEA025584.1
					TEA029985.1		TEA025615.1
					TEA030008.1		TEA025628.1
					TEA030011.1		TEA025645.1
					TEA030017.1		TEA025666.1
					TEA030022.1		TEA025688.1
					TEA030104.1		TEA025718.1
					TEA030105.1		TEA025846.1
					TEA030117.1		TEA025867.1
					TEA030164.1		TEA025875.1
					TEA030168.1		TEA025878.1
					TEA030182.1		TEA025927.1
					TEA030203.1		TEA025932.1
					TEA030246.1		TEA025977.1
					TEA030261.1		TEA025982.1
					TEA030277.1		TEA025996.1
					TEA030295.1		TEA026006.1
					TEA030323.1		TEA026008.1
					TEA030336.1		TEA026015.1
					TEA030346.1		TEA026021.1
					TEA030349.1		TEA026027.1
					TEA030358.1		TEA026050.1
					TEA030362.1		TEA026082.1
					TEA030371.1		TEA026107.1
					TEA030402.1		TEA026109.1
					TEA030403.1		TEA026151.1
					TEA030425.1		TEA026169.1
					TEA030453.1		TEA026224.1
					TEA030460.1		TEA026237.1
					TEA030469.1		TEA026245.1
					TEA030506.1		TEA026248.1
					TEA030507.1		TEA026253.1
					TEA030510.1		TEA026319.1
					TEA030582.1		TEA026320.1
					TEA030595.1		TEA026341.1
					TEA030626.1		TEA026346.1
					TEA030650.1		TEA026377.1
					TEA030721.1		TEA026420.1
					TEA030746.1		TEA026486.1
					TEA030748.1		TEA026526.1
					TEA030781.1		TEA026543.1
					TEA030790.1		TEA026549.1
					TEA030816.1		TEA026577.1
					TEA030892.1		TEA026588.1
					TEA030902.1		TEA026603.1
					TEA030941.1		TEA026654.1
					TEA030964.1		TEA026680.1
					TEA030965.1		TEA026698.1
					TEA030984.1		TEA026713.1
					TEA031014.1		TEA026797.1
					TEA031018.1		TEA026803.1
					TEA031031.1		TEA026805.1
					TEA031035.1		TEA026840.1
					TEA031102.1		TEA026853.1
					TEA031134.1		TEA026898.1
					TEA031164.1		TEA026916.1
					TEA031174.1		TEA026939.1
					TEA031211.1		TEA026948.1
					TEA031231.1		TEA026953.1
					TEA031235.1		TEA026956.1
					TEA031236.1		TEA026960.1
					TEA031240.1		TEA026973.1
					TEA031265.1		TEA026980.1
					TEA031267.1		TEA026981.1
					TEA031273.1		TEA027007.1
					TEA031278.1		TEA027023.1
					TEA031309.1		TEA027026.1
					TEA031310.1		TEA027031.1
					TEA031352.1		TEA027062.1
					TEA031362.1		TEA027070.1
					TEA031365.1		TEA027105.1
					TEA031367.1		TEA027136.1
					TEA031388.1		TEA027149.1
					TEA031401.1		TEA027164.1
					TEA031402.1		TEA027217.1
					TEA031430.1		TEA027298.1
					TEA031473.1		TEA027307.1
					TEA031494.1		TEA027313.1
					TEA031497.1		TEA027355.1
					TEA031507.1		TEA027394.1
					TEA031526.1		TEA027431.1
					TEA031551.1		TEA027446.1
					TEA031553.1		TEA027459.1
					TEA031569.1		TEA027475.1
					TEA031572.1		TEA027480.1
					TEA031581.1		TEA027498.1
					TEA031617.1		TEA027533.1
					TEA031658.1		TEA027538.1
					TEA031661.1		TEA027544.1
					TEA031677.1		TEA027554.1
					TEA031698.1		TEA027577.1
					TEA031699.1		TEA027635.1
					TEA031707.1		TEA027641.1
					TEA031709.1		TEA027658.1
					TEA031722.1		TEA027666.1
					TEA031744.1		TEA027680.1
					TEA031748.1		TEA027693.1
					TEA031749.1		TEA027709.1
					TEA031752.1		TEA027772.1
					TEA031776.1		TEA027779.1
					TEA031793.1		TEA027809.1
					TEA031801.1		TEA027818.1
					TEA031833.1		TEA027838.1
					TEA031862.1		TEA027860.1
					TEA031872.1		TEA027863.1
					TEA031887.1		TEA027867.1
					TEA031892.1		TEA027872.1
					TEA031897.1		TEA027897.1
					TEA031933.1		TEA027913.1
					TEA031940.1		TEA027943.1
					TEA031959.1		TEA027944.1
					TEA032001.1		TEA027958.1
					TEA032025.1		TEA028016.1
					TEA032036.1		TEA028043.1
					TEA032042.1		TEA028054.1
					TEA032043.1		TEA028087.1
					TEA032062.1		TEA028111.1
					TEA032080.1		TEA028144.1
					TEA032081.1		TEA028161.1
					TEA032084.1		TEA028194.1
					TEA032099.1		TEA028198.1
					TEA032101.1		TEA028222.1
					TEA032103.1		TEA028305.1
					TEA032110.1		TEA028316.1
					TEA032123.1		TEA028327.1
					TEA032145.1		TEA028381.1
					TEA032162.1		TEA028384.1
					TEA032238.1		TEA028387.1
					TEA032292.1		TEA028394.1
					TEA032311.1		TEA028463.1
					TEA032321.1		TEA028483.1
					TEA032322.1		TEA028520.1
					TEA032331.1		TEA028559.1
					TEA032359.1		TEA028566.1
					TEA032364.1		TEA028584.1
					TEA032409.1		TEA028617.1
					TEA032420.1		TEA028621.1
					TEA032434.1		TEA028649.1
					TEA032480.1		TEA028676.1
					TEA032506.1		TEA028678.1
					TEA032540.1		TEA028694.1
					TEA032547.1		TEA028747.1
					TEA032552.1		TEA028752.1
					TEA032571.1		TEA028759.1
					TEA032581.1		TEA028792.1
					TEA032647.1		TEA028806.1
					TEA032653.1		TEA028807.1
					TEA032663.1		TEA028808.1
					TEA032691.1		TEA028810.1
					TEA032713.1		TEA028824.1
					TEA032719.1		TEA028859.1
					TEA032741.1		TEA028869.1
					TEA032743.1		TEA028872.1
					TEA032748.1		TEA028879.1
					TEA032763.1		TEA028880.1
					TEA032767.1		TEA028886.1
					TEA032797.1		TEA028909.1
					TEA032819.1		TEA028916.1
					TEA032821.1		TEA028925.1
					TEA032827.1		TEA028943.1
					TEA032846.1		TEA028975.1
					TEA032872.1		TEA028981.1
					TEA032878.1		TEA028987.1
					TEA032898.1		TEA029024.1
					TEA032932.1		TEA029051.1
					TEA032939.1		TEA029056.1
					TEA032971.1		TEA029067.1
					TEA032972.1		TEA029119.1
					TEA032973.1		TEA029138.1
					TEA032977.1		TEA029146.1
					TEA032991.1		TEA029187.1
					TEA033010.1		TEA029267.1
					TEA033028.1		TEA029285.1
					TEA033082.1		TEA029294.1
					TEA033122.1		TEA029295.1
					TEA033127.1		TEA029308.1
					TEA033176.1		TEA029354.1
					TEA033211.1		TEA029367.1
					TEA033220.1		TEA029372.1
					TEA033314.1		TEA029398.1
					TEA033366.1		TEA029417.1
					TEA033375.1		TEA029437.1
					TEA033380.1		TEA029443.1
					TEA033415.1		TEA029462.1
					TEA033485.1		TEA029463.1
					TEA033561.1		TEA029532.1
					TEA033591.1		TEA029537.1
					TEA033614.1		TEA029594.1
					TEA033616.1		TEA029649.1
					TEA033642.1		TEA029677.1
					TEA033676.1		TEA029696.1
					TEA033709.1		TEA029699.1
					TEA033719.1		TEA029710.1
					TEA033724.1		TEA029747.1
					TEA033786.1		TEA029757.1
					TEA033853.1		TEA029764.1
					TEA033855.1		TEA029766.1
					TEA033876.1		TEA029785.1
					TEA034006.1		TEA029788.1
					TEA034017.1		TEA029793.1
					TEA034027.1		TEA029877.1
					TEA034028.1		TEA029879.1
					TEA034030.1		TEA029916.1
					TEA034038.1		TEA029927.1
					TEA034050.1		TEA029969.1
							TEA029972.1
							TEA029981.1
							TEA030009.1
							TEA030031.1
							TEA030035.1
							TEA030038.1
							TEA030044.1
							TEA030079.1
							TEA030098.1
							TEA030102.1
							TEA030119.1
							TEA030125.1
							TEA030126.1
							TEA030166.1
							TEA030217.1
							TEA030219.1
							TEA030224.1
							TEA030249.1
							TEA030270.1
							TEA030284.1
							TEA030302.1
							TEA030307.1
							TEA030330.1
							TEA030348.1
							TEA030365.1
							TEA030384.1
							TEA030397.1
							TEA030412.1
							TEA030428.1
							TEA030430.1
							TEA030436.1
							TEA030461.1
							TEA030494.1
							TEA030501.1
							TEA030508.1
							TEA030527.1
							TEA030555.1
							TEA030559.1
							TEA030566.1
							TEA030593.1
							TEA030601.1
							TEA030604.1
							TEA030617.1
							TEA030647.1
							TEA030692.1
							TEA030778.1
							TEA030818.1
							TEA030840.1
							TEA030846.1
							TEA030985.1
							TEA031045.1
							TEA031051.1
							TEA031052.1
							TEA031065.1
							TEA031096.1
							TEA031144.1
							TEA031145.1
							TEA031150.1
							TEA031151.1
							TEA031178.1
							TEA031182.1
							TEA031196.1
							TEA031245.1
							TEA031283.1
							TEA031295.1
							TEA031359.1
							TEA031398.1
							TEA031404.1
							TEA031449.1
							TEA031465.1
							TEA031475.1
							TEA031481.1
							TEA031492.1
							TEA031542.1
							TEA031546.1
							TEA031554.1
							TEA031629.1
							TEA031667.1
							TEA031690.1
							TEA031743.1
							TEA031772.1
							TEA031817.1
							TEA031824.1
							TEA031870.1
							TEA031947.1
							TEA031949.1
							TEA031976.1
							TEA032005.1
							TEA032013.1
							TEA032087.1
							TEA032116.1
							TEA032124.1
							TEA032147.1
							TEA032154.1
							TEA032195.1
							TEA032208.1
							TEA032224.1
							TEA032260.1
							TEA032269.1
							TEA032273.1
							TEA032275.1
							TEA032289.1
							TEA032382.1
							TEA032384.1
							TEA032413.1
							TEA032441.1
							TEA032475.1
							TEA032499.1
							TEA032517.1
							TEA032537.1
							TEA032562.1
							TEA032566.1
							TEA032585.1
							TEA032598.1
							TEA032632.1
							TEA032640.1
							TEA032667.1
							TEA032672.1
							TEA032675.1
							TEA032693.1
							TEA032723.1
							TEA032773.1
							TEA032776.1
							TEA032835.1
							TEA032850.1
							TEA032895.1
							TEA032899.1
							TEA032909.1
							TEA032927.1
							TEA032929.1
							TEA032943.1
							TEA032963.1
							TEA032975.1
							TEA032992.1
							TEA033027.1
							TEA033033.1
							TEA033084.1
							TEA033099.1
							TEA033117.1
							TEA033138.1
							TEA033198.1
							TEA033203.1
							TEA033219.1
							TEA033225.1
							TEA033269.1
							TEA033271.1
							TEA033319.1
							TEA033348.1
							TEA033362.1
							TEA033363.1
							TEA033365.1
							TEA033407.1
							TEA033494.1
							TEA033566.1
							TEA033571.1
							TEA033577.1
							TEA033578.1
							TEA033581.1
							TEA033621.1
							TEA033658.1
							TEA033670.1
							TEA033792.1
							TEA033816.1
							TEA033832.1
							TEA033833.1
							TEA033840.1
							TEA033863.1
							TEA033877.1
							TEA033895.1

## Sheet: Table S4
Table S4. Overview of sRNA sequencing of the different leaf positions in tea plants
Samples	Raw reads	3ADT&length filter	Junk reads	Rfam					mRNA	Repeats	valid reads	uniq valid reads
				rRNA	tRNA	snoRNA	snRNA	other RNA
B_1	12361169	4185677	38243	37775	18329	13502	1152	736904	428641	2918	7124912	2836161
B_2	11312929	3934583	64266	14956	15463	11373	1237	964702	549711	3867	6033224	4383758
B_3	13318670	3058072	94193	22281	18454	12582	1886	1162824	720892	4771	8565803	6123595
L1_1	12344266	2014393	68347	16255	21219	8781	1316	1010288	753030	5346	8782077	6147481
L1_2	11201718	1611978	77433	16016	14544	9054	1386	1063643	654401	4604	8032947	5699702
L1_3	13616988	2959591	105379	16062	13840	15102	1936	825257	629075	4218	9297827	6535426
L2_1	12548651	1783083	110756	10024	9168	7203	1435	757366	594103	3111	9520164	7003416
L2_2	13137915	6905465	42657	19212	19821	11352	995	927065	525313	4231	4957107	3533579
L2_3	10615170	1811868	79228	14378	14503	6763	1597	794077	522701	3173	7611396	5572785
L3_1	13491043	4374418	66417	44455	21759	9612	1885	1676988	918222	6454	6933816	4909133
L3_2	11129932	2786147	66313	21188	14887	7918	1427	1036459	596756	4982	6886848	5038096
L3_3	13504987	1492221	197286	52622	57639	8101	1861	1249607	810506	5840	10153263	7043064
L4_1	13875073	5464528	53766	91566	27686	10149	1916	2101394	1112676	9069	5811167	4115007
L4_2	14435509	6605137	59000	169036	41353	16146	5539	3204973	1582016	12886	4118231	4118231
L4_3	14036857	5826737	64940	318208	49847	9809	4288	4085616	2131113	16033	3550241	2525040
Average	1.27287e+07										7.1586e+06	5.03896e+06

## Sheet: Table S5
Table S5. The miRNA IDs of the five clusters in DEmiRNAs
Cluster1	Cluster2	Cluster3	Cluster4	Cluster5
csi-miR159b-5p	mtr-miR168b_1ss5TC	mtr-miR162_R+1	ptc-miR156a_R+11	rco-miR167c_R-1
gma-miR319a	gma-MIR390g-p3	mtr-miR171c_2ss13GT21TC	mtr-miR167a_L-1R+1	mdm-miR167b
ptc-miR160b-3p	tcc-MIR403a-p5_1ss20TC	mtr-miR171d_R+1	mtr-miR167a_R+1	mtr-miR164a
gma-miR160a-3p	ptc-MIR156f-p3	mtr-miR396a-3p_2ss2CT11GC	mtr-miR167b-5p_R+1	mtr-miR164a_L+1
mdm-miR171f-5p_1ss11CG	vvi-miR845d_R+3_2ss1TA19AT	stu-miR8016_1ss12GA	mtr-miR169a_L+2R-2	mtr-miR166a_L+2R-2_1ss21CT
mdm-MIR319c-p3	mtr-miR166g-5p_1ss1GT	PC-5p-19881_283	ath-miR169b-3p_L+1R-1_2ss13CA16C-	csi-miR167a-3p_2ss8CA15TC
csi-MIR858-p5_1ss4TG	ptc-miR166n_L+2_1ss23TC	PC-5p-13105_415	stu-miR171d-3p_R-1_1ss19AG	gma-miR167a_R+1
stu-MIR8005c-p3_1ss11AG	gma-miR166m_L+1_1ss3GT	PC-3p-5834_835	gma-miR171m_1ss21AT	mtr-miR168c-3p_L-1
nta-MIR160b-p3	bra-miR168a-5p_L+2	PC-5p-6471_769	mtr-miR172c-5p	mtr-MIR168c-p3
mtr-miR164a_1ss21AG	mdm-miR482a-3p_1ss12GT	PC-5p-64746_76	gra-miR172a_2ss8TC11CT	mtr-miR168b_R-1
mtr-miR166e-5p	cme-miR2111a_L-1R+4	PC-5p-13839_394	mdm-MIR391-p5_2ss16CT20GA	mtr-miR393a_R+1
mtr-miR166a_1ss21CT	PC-3p-32281_176	PC-3p-53959_97	gma-miR395a_1ss19CT	gma-miR394a-5p
csi-miR166f-5p_2ss4CA10TG	PC-3p-8580_605	PC-3p-464_5801	mtr-miR396a-5p_L-1R+1	aly-miR395d-5p_2ss5TC8CG
mtr-miR166a_L+1R-1	PC-5p-99783_38	PC-3p-14924_368	mtr-miR396b-3p_2ss7TG8AG	vvi-MIR403d-p5_1ss14AG
gma-miR167e	PC-3p-10130_520	PC-5p-19934_282	mtr-miR396b-5p	cpa-MIR164b-p5
ptc-miR169i_R+1	PC-5p-37314_151	PC-5p-177_12750	mtr-miR396b-3p_1ss21GA	mtr-miR166g-5p_1ss1GA
mdm-miR169b	PC-5p-68563_70	PC-5p-5777_841	dpr-MIR396-p3_1ss1CT	gra-miR167a_L-2R+2
gma-miR171j-5p_2ss8CT9TC	PC-3p-51199_104	PC-3p-9333_562	mtr-miR396a-5p	gma-miR167k_R-3_1ss9CT
mtr-miR390_L-1	PC-3p-9018_579	PC-5p-2278_1792	mtr-miR396a-3p_2ss20GA21AG	nta-MIR172e-p3_2ss15CG19TA
mtr-miR397-5p_1ss2CA	PC-3p-78263_57	PC-5p-31174_182	ath-MIR396b-p3_1ss18AG	mtr-MIR2603-p3_2ss9AC17AC
stu-miR477a-5p_R+1_3ss1CA20TC21CA	PC-3p-48225_112	PC-3p-50669_105	ptc-MIR396e-p3	gma-MIR5368-p3_2ss2AT19CA
stu-miR482a-5p_2ss3AG12AC	PC-5p-984_3445	PC-3p-9162_571	mtr-miR398b	gma-MIR5368-p5_2ss16TC19CT
stu-miR530_1ss10GA	PC-5p-554_5183	PC-3p-9558_549	ptc-miR399i	ghr-MIR7499-p3_2ss10GC17CG_1
mtr-miR2111a-5p_1ss21AG	PC-3p-6910_725	PC-5p-36015_157	ptc-miR403a	ghr-MIR7499-p3_2ss10GC17CG_2
mtr-miR2111a-5p_R-1	PC-3p-17061_326	PC-3p-38773_145	mes-MIR477f-p5_1ss1CT_1	gra-MIR8757b-p5_1ss17GC
nta-MIR6149a-p5_2ss18CT21TA	PC-5p-8519_609	PC-3p-24254_234	mes-MIR477f-p5_1ss1CT_2	mdm-MIR11004-p3_1ss19TC
gma-miR159d_2ss8TG10GT	PC-5p-61074_82	PC-3p-5306_899	vvi-MIR482-p3_2ss8CT18TA	mdm-MIR11004-p3_1ss20TC
mtr-miR159a	PC-5p-8443_614	PC-3p-2422_1716	mdm-miR535a	PC-5p-1871_2101
mtr-miR159a_1ss20TC	PC-5p-20984_268	PC-5p-22902_247	ppe-MIR169b-p3_2ss10TA21TC	PC-3p-19789_284
mtr-miR164a_R+1_1ss21AG	PC-3p-15472_356	PC-3p-22747_249	ptc-miR530a_R+1_1ss20TG	PC-3p-1494_2488
mtr-miR166g-5p_L-1R+1	PC-5p-14067_388	PC-3p-43266_128	ptc-miR530a_R-2	PC-3p-4944_958
mtr-miR166g-5p_2ss11CT21GA	PC-3p-16761_331	PC-3p-36009_157	gma-miR171e_L+2	PC-3p-35709_158
mtr-miR319a-5p_2ss13AT21CT	PC-3p-38366_146	PC-3p-21408_263	vvi-miR396a_1ss20TC
aly-MIR319d-p3_2ss1TC21TG	PC-5p-16169_342	PC-3p-206_10727	PC-5p-24812_229
ptc-MIR319c-p3_1ss20AG	PC-5p-45326_121	PC-3p-4376_1064	PC-3p-6132_801
gma-miR394b-3p_R+1_1ss15TC	PC-3p-24414_232	PC-5p-29877_191	PC-5p-6930_723
ppe-MIR482d-p3_2ss10TC19TG	PC-3p-43439_127	PC-3p-17389_321	PC-5p-11489_467
ppe-MIR482d-p5_2ss12TC21TG	PC-3p-38850_144	PC-3p-23870_237	PC-5p-11999_450
csi-miR536-3p_2ss15GA21CT	PC-5p-27782_205	PC-3p-11316_473	PC-3p-2771_1538
vvi-MIR828a-p3_2ss18AG22CT	PC-3p-41134_135	PC-3p-30924_184	PC-5p-37262_151
vvi-miR3630-3p_1ss22CT	PC-3p-51010_104	PC-3p-42602_130	PC-3p-642_4655
stu-MIR5303h-p3_2ss5AT17TA	PC-5p-46066_118	PC-5p-38570_145	PC-3p-33202_171
gma-miR169l-3p_L-2R+1_1ss10TC	PC-3p-19698_286	PC-5p-53200_99	PC-3p-9280_565
mdm-miR319b-5p_L+1	PC-3p-13782_396	PC-5p-40326_138
PC-5p-10087_522	PC-5p-634_4681	PC-3p-27120_209
PC-5p-54800_95	PC-3p-65945_74	PC-5p-9872_533
PC-3p-61252_82	PC-3p-5699_849	PC-5p-13814_395
PC-5p-35232_160	PC-5p-49935_107	PC-5p-32373_175
PC-3p-15743_350	PC-3p-22827_248	PC-5p-8810_592
PC-3p-78787_57	PC-5p-21064_267	PC-5p-22757_249
PC-5p-20853_270	PC-3p-24596_231	PC-3p-22336_253
PC-3p-71291_66	PC-3p-51499_103	PC-3p-19859_283
PC-3p-17865_313	PC-3p-42917_129	PC-3p-1008_3381
	PC-3p-25846_220	PC-3p-2453_1699
	PC-5p-47183_115
	PC-3p-33868_167
	PC-3p-48496_111

## Sheet: Table S6
Table S6. Nodes in the coexpression network of related taste compounds
miRNA	class	new id
ptc-miR156a_R+1	miRNA	miR156
mtr-miR159a	miRNA	miR159a
mtr-miR159a_1ss20TC	miRNA	miR159b
mtr-miR164a	miRNA	miR164a
mtr-miR164a_1ss21AG	miRNA	miR164b
mtr-miR164a_R+1_1ss21AG	miRNA	miR164c
mtr-miR166a_1ss21CT	miRNA	miR166a
mtr-miR166a_L+1R-1	miRNA	miR166b
gma-miR166m_L+1_1ss3GT	miRNA	miR166c
mtr-miR167a_L-1R+1	miRNA	miR167a
gra-miR167a_L-2R+2	miRNA	miR167b
gma-miR167e	miRNA	miR167c
gma-miR167k_R-3_1ss9CT	miRNA	miR167d
mtr-miR168b_R-1	miRNA	miR168
mdm-miR169b	miRNA	miR169a
ppe-MIR169b-p3_2ss10TA21TC	miRNA	miR169b
ptc-miR169i_R+1	miRNA	miR169c
mtr-miR171c_2ss13GT21TC	miRNA	miR171a
mtr-miR171d_R+1	miRNA	miR171b
stu-miR171d-3p_R-1_1ss19AG	miRNA	miR171c
gma-miR171m_1ss21AT	miRNA	miR171d
mtr-miR172c-5p	miRNA	miR172a
nta-MIR172e-p3_2ss15CG19TA	miRNA	miR172b
mtr-miR2111a-5p_1ss21AG	miRNA	miR2111a
mtr-miR2111a-5p_R-1	miRNA	miR2111b
mtr-MIR2603-p3_2ss9AC17AC	miRNA	miR2603
mtr-miR319a-5p_2ss13AT21CT	miRNA	miR319a
mdm-miR319b-5p_L+1	miRNA	miR319b
mtr-miR393a_R+1	miRNA	miR393
gma-miR395a_1ss19CT	miRNA	miR395
vvi-miR396a_1ss20TC	miRNA	miR396a
mtr-miR396a-5p	miRNA	miR396b
mtr-miR396a-5p_L-1R+1	miRNA	miR396c
mtr-miR396b-5p	miRNA	miR396d
mtr-miR397-5p_1ss2CA	miRNA	miR397
mtr-miR398b	miRNA	miR398
ptc-miR403a	miRNA	miR403a
tcc-MIR403a-p5_1ss20TC	miRNA	miR403b
mes-MIR477f-p5_1ss1CT_1	miRNA	miR477a
mes-MIR477f-p5_1ss1CT_2	miRNA	miR477b
ptc-miR530a_R-2	miRNA	miR530
mdm-miR535a	miRNA	miR535
gma-MIR5368-p5_2ss16TC19CT	miRNA	miR5368
nta-MIR6149a-p5_2ss18CT21TA	miRNA	miR6149
ghr-MIR7499-p3_2ss10GC17CG_1	miRNA	miR7499a
ghr-MIR7499-p3_2ss10GC17CG_2	miRNA	miR7499b
stu-MIR8005c-p3_1ss11AG	miRNA	miR8005
csi-MIR858-p5_1ss4TG	miRNA	miR858
gra-MIR8757b-p5_1ss17GC	miRNA	miR8757
PC-3p-15743_350	miRNA	PC-3p-15743_350
PC-3p-19789_284	miRNA	PC-3p-19789_284
PC-3p-24596_231	miRNA	PC-3p-24596_231
PC-3p-2771_1538	miRNA	PC-3p-2771_1538
PC-3p-42917_129	miRNA	PC-3p-42917_129
PC-3p-43439_127	miRNA	PC-3p-43439_127
PC-3p-4376_1064	miRNA	PC-3p-4376_1064
PC-3p-6132_801	miRNA	PC-3p-6132_801
PC-3p-71291_66	miRNA	PC-3p-71291_66
PC-3p-78787_57	miRNA	PC-3p-78787_57
PC-5p-11999_450	miRNA	PC-5p-11999_450
PC-5p-54800_95	miRNA	PC-5p-54800_95
TEA001719.1	target	ABCF1
TEA001714.1	target	ABCF2
TEA024504.1	target	ABCF3
TEA012588.1	target	ADK
TEA015241.1	target	AGO1
TEA007610.1	target	AGO2
TEA016229.1	target	BAM1
TEA010380.1	target	BAM2
TEA000234.1	target	CAD
TEA002141.1	target	CALD
TEA009565.1	target	CALS
TEA031434.1	target	CCB
TEA002585.1	target	CCD
TEA031238.1	target	CENPE
TEA028959.1	target	CEX1
TEA001672.1	target	CEX2
TEA014492.1	target	CEX3
TEA010738.1	target	CRB
TEA014197.1	target	CYCD
TEA005648.1	target	EXO70A1
TEA032547.1	target	F-box
TEA001390.1	target	GEM1
TEA004376.1	target	GEM2
TEA014596.1	target	GEM3
TEA016295.1	target	GH
TEA004965.1	target	HMOX
TEA023390.1	target	KCS
TEA030739.1	target	LAC
TEA013303.1	target	LHW
TEA011367.1	target	LHY
TEA024991.1	target	LPR
TEA001647.1	target	Mcm
TEA008208.1	target	P4
TEA010299.1	target	PCNA
TEA016725.1	target	PPF
TEA031554.1	target	PrfB
TEA007295.1	target	PUB
TEA008702.1	target	SBP
TEA028449.1	target	SLD
TEA017479.1	target	SMT
TEA011860.1	target	SPINB
TEA011325.1	target	TAR
TEA000659.1	target	TIR
TEA004547.1	target	TMK
TEA023526.1	target	UGT73C2_1
TEA031479.1	target	UGT73C2_2
TEA010779.1	target	Un1
TEA016788.1	target	Un2
TEA005520.1	target	Un3
TEA003128.1	target	Un4
TEA017759.1	target	Un5
TEA015967.1	target	Un6
TEA021257.1	target	Un7
TEA031818.1	target	VAMP
TEA025970.1	target	WAK
TEA016012.1	target	web
TEA006319.1	target	YODA
TEA029643.1	TF	B3-ARF
TEA033198.1	TF	bHLH
TEA024795.1	TF	C2C2-GATA
TEA013558.1	TF	GRAS1
TEA029437.1	TF	GRAS2
TEA000848.1	TF	GRF1
TEA000953.1	TF	GRF2
TEA001894.1	TF	GRF3
TEA014228.1	TF	GRF4
TEA015861.1	TF	GRF5
TEA018911.1	TF	GRF6
TEA022654.1	TF	GRF7
TEA024696.1	TF	GRF8
TEA026508.1	TF	GRF9
TEA027740.1	TF	GRF10
TEA028352.1	TF	GRF11
TEA030790.1	TF	GRF12
TEA033522.1	TF	GRF13
TEA000705.1	TF	HB-HD-ZIP1
TEA000776.1	TF	HB-HD-ZIP2
TEA004692.1	TF	HB-HD-ZIP3
TEA008271.1	TF	HB-HD-ZIP4
TEA031027.1	TF	HB-HD-ZIP5
TEA000258.1	TF	NAC
TEA009053.1	TF	NF-YA1
TEA023550.1	TF	NF-YA2
TEA025632.1	TF	NF-YA3
TEA001755.1	TF	SBP1
TEA004492.1	TF	SBP2
TEA006584.1	TF	SBP3
TEA008888.1	TF	SBP4
TEA019245.1	TF	SBP5
TEA023795.1	TF	SBP6
TEA017070.1	TF	Trihelix
TEA008357.1	catechin	4CL1
TEA009431.1	catechin	4CL2
TEA027829.1	catechin	4CL3
TEA031627.1	catechin	4CL4
TEA030009.1	catechin	ANR1
TEA030023.1	catechin	ANR2
TEA010322.1	catechin	ANS
TEA033031.1	catechin	CHI
TEA010588.1	catechin	DFR1
TEA032730.1	catechin	DFR2
TEA000753.1	catechin	F3H1
TEA002405.1	catechin	F3H2
TEA004906.1	catechin	F3H3
TEA010732.1	catechin	F3H4
TEA016601.1	catechin	F3H5
TEA022348.1	catechin	F3H6
TEA034016.1	catechin	F3H7
TEA016716.1	catechin	F3_H1
TEA016718.1	catechin	F3_H2
TEA021535.1	catechin	LAR1
TEA026458.1	catechin	LAR2
TEA003137.1	catechin	PAL1
TEA014056.1	catechin	PAL2
TEA014166.1	catechin	PAL3
TEA000223.1	catechin	SCPL1A1
TEA009664.1	catechin	SCPL1A2
TEA010715.1	catechin	SCPL1A3
TEA016463.1	catechin	SCPL1A4
TEA016469.1	catechin	SCPL1A5
TEA023432.1	catechin	SCPL1A6
TEA023444.1	catechin	SCPL1A7
TEA023451.1	catechin	SCPL1A8
TEA034017.1	catechin	SCPL1A9
TEA034028.1	catechin	SCPL1A10
TEA034032.1	catechin	SCPL1A11
TEA034036.1	catechin	SCPL1A12
TEA034050.1	catechin	SCPL1A13
TEA016704.1	caffeine	5-NT
TEA007189.1	caffeine	AMPD1
TEA010278.1	caffeine	AMPD2
TEA015248.1	caffeine	APRT1
TEA017768.1	caffeine	APRT2
TEA017916.1	caffeine	APRT3
TEA022940.1	caffeine	APRT4
TEA027599.1	caffeine	APRT5
TEA007658.1	caffeine	ASS
TEA004815.1	caffeine	CYP1A2_1
TEA010267.1	caffeine	CYP1A2_2
TEA024175.1	caffeine	IMPDH
TEA006735.1	caffeine	SAMS1
TEA014699.1	caffeine	SAMS2
TEA014705.1	caffeine	SAMS3
TEA017731.1	caffeine	SAMS4
TEA015791.1	caffeine	TCS1
TEA028050.1	caffeine	TCS2
TEA025393.1	caffeine	XDH
TEA028111.1	caffeine	XO
TEA009777.1	theanine	ADC1
TEA032991.1	theanine	ADC2
TEA006665.1	theanine	GDH1
TEA034006.1	theanine	GDH2
TEA015536.1	theanine	GS1
TEA028194.1	theanine	GS2
TEA032123.1	theanine	GS3
TEA032217.1	theanine	GS4

## Sheet: Table S7
Table S7. Edges in the coexpression network of related taste compounds
from node	to node
csi-MIR858-p5_1ss4TG	TEA001390.1
csi-MIR858-p5_1ss4TG	TEA004376.1
csi-MIR858-p5_1ss4TG	TEA014596.1
csi-MIR858-p5_1ss4TG	TEA025970.1
ghr-MIR7499-p3_2ss10GC17CG_1	TEA016295.1
ghr-MIR7499-p3_2ss10GC17CG_2	TEA016295.1
gma-miR166m_L+1_1ss3GT	TEA017479.1
gma-miR167e	TEA002585.1
gma-miR167k_R-3_1ss9CT	TEA029643.1
gma-miR167k_R-3_1ss9CT	TEA031554.1
gma-miR167k_R-3_1ss9CT	TEA031818.1
gma-miR171m_1ss21AT	TEA013558.1
gma-miR171m_1ss21AT	TEA029437.1
gma-miR395a_1ss19CT	TEA023390.1
gma-MIR5368-p5_2ss16TC19CT	TEA021257.1
gra-miR167a_L-2R+2	TEA016012.1
gra-MIR8757b-p5_1ss17GC	TEA005648.1
gra-MIR8757b-p5_1ss17GC	TEA027740.1
mdm-miR169b	TEA009053.1
mdm-miR169b	TEA023550.1
mdm-miR169b	TEA025632.1
mdm-miR319b-5p_L+1	TEA010299.1
mdm-miR535a	TEA008702.1
mes-MIR477f-p5_1ss1CT_1	TEA010779.1
mes-MIR477f-p5_1ss1CT_1	TEA016788.1
mes-MIR477f-p5_1ss1CT_2	TEA010779.1
mes-MIR477f-p5_1ss1CT_2	TEA016788.1
mtr-miR159a_1ss20TC	TEA015967.1
mtr-miR159a	TEA015967.1
mtr-miR164a_1ss21AG	TEA000258.1
mtr-miR164a_1ss21AG	TEA011325.1
mtr-miR164a_R+1_1ss21AG	TEA000258.1
mtr-miR164a	TEA000258.1
mtr-miR164a	TEA011325.1
mtr-miR166a_1ss21CT	TEA000705.1
mtr-miR166a_1ss21CT	TEA000776.1
mtr-miR166a_1ss21CT	TEA004692.1
mtr-miR166a_1ss21CT	TEA008271.1
mtr-miR166a_1ss21CT	TEA031027.1
mtr-miR166a_L+1R-1	TEA000705.1
mtr-miR166a_L+1R-1	TEA000776.1
mtr-miR166a_L+1R-1	TEA004692.1
mtr-miR166a_L+1R-1	TEA008271.1
mtr-miR166a_L+1R-1	TEA031027.1
mtr-miR167a_L-1R+1	TEA012588.1
mtr-miR168b_R-1	TEA009565.1
mtr-miR171c_2ss13GT21TC	TEA001714.1
mtr-miR171c_2ss13GT21TC	TEA001719.1
mtr-miR171c_2ss13GT21TC	TEA013558.1
mtr-miR171c_2ss13GT21TC	TEA029437.1
mtr-miR171d_R+1	TEA013558.1
mtr-miR171d_R+1	TEA029437.1
mtr-miR172c-5p	TEA024991.1
mtr-miR2111a-5p_1ss21AG	TEA013303.1
mtr-miR2111a-5p_R-1	TEA002141.1
mtr-miR2111a-5p_R-1	TEA013303.1
mtr-MIR2603-p3_2ss9AC17AC	TEA011860.1
mtr-miR319a-5p_2ss13AT21CT	TEA011367.1
mtr-miR393a_R+1	TEA000659.1
mtr-miR393a_R+1	TEA033198.1
mtr-miR396a-5p_L-1R+1	TEA001647.1
mtr-miR396a-5p	TEA000848.1
mtr-miR396a-5p	TEA000953.1
mtr-miR396a-5p	TEA001894.1
mtr-miR396a-5p	TEA014228.1
mtr-miR396a-5p	TEA015861.1
mtr-miR396a-5p	TEA018911.1
mtr-miR396a-5p	TEA022654.1
mtr-miR396a-5p	TEA024696.1
mtr-miR396a-5p	TEA026508.1
mtr-miR396a-5p	TEA027740.1
mtr-miR396a-5p	TEA028352.1
mtr-miR396a-5p	TEA030790.1
mtr-miR396a-5p	TEA033522.1
mtr-miR396b-5p	TEA000848.1
mtr-miR396b-5p	TEA000953.1
mtr-miR396b-5p	TEA001894.1
mtr-miR396b-5p	TEA014228.1
mtr-miR396b-5p	TEA015861.1
mtr-miR396b-5p	TEA018911.1
mtr-miR396b-5p	TEA022654.1
mtr-miR396b-5p	TEA024696.1
mtr-miR396b-5p	TEA026508.1
mtr-miR396b-5p	TEA027740.1
mtr-miR396b-5p	TEA028352.1
mtr-miR396b-5p	TEA030790.1
mtr-miR396b-5p	TEA033522.1
mtr-miR397-5p_1ss2CA	TEA030739.1
mtr-miR398b	TEA024795.1
nta-MIR172e-p3_2ss15CG19TA	TEA016725.1
nta-MIR6149a-p5_2ss18CT21TA	TEA032547.1
PC-3p-15743_350	TEA024504.1
PC-3p-15743_350	TEA031434.1
PC-3p-19789_284	TEA001672.1
PC-3p-19789_284	TEA004965.1
PC-3p-19789_284	TEA014492.1
PC-3p-24596_231	TEA010738.1
PC-3p-2771_1538	TEA004547.1
PC-3p-42917_129	TEA017759.1
PC-3p-43439_127	TEA031238.1
PC-3p-4376_1064	TEA007295.1
PC-3p-6132_801	TEA006319.1
PC-3p-71291_66	TEA014197.1
PC-3p-78787_57	TEA000234.1
PC-5p-11999_450	TEA008208.1
PC-5p-54800_95	TEA016229.1
ppe-MIR169b-p3_2ss10TA21TC	TEA023526.1
ppe-MIR169b-p3_2ss10TA21TC	TEA031479.1
ptc-miR156a_R+1	TEA001755.1
ptc-miR156a_R+1	TEA004492.1
ptc-miR156a_R+1	TEA006584.1
ptc-miR156a_R+1	TEA008702.1
ptc-miR156a_R+1	TEA008888.1
ptc-miR156a_R+1	TEA019245.1
ptc-miR156a_R+1	TEA023795.1
ptc-miR169i_R+1	TEA009053.1
ptc-miR169i_R+1	TEA025632.1
ptc-miR403a	TEA007610.1
ptc-miR403a	TEA015241.1
ptc-miR530a_R-2	TEA010380.1
ptc-miR530a_R-2	TEA017070.1
stu-miR171d-3p_R-1_1ss19AG	TEA013558.1
stu-miR171d-3p_R-1_1ss19AG	TEA029437.1
stu-MIR8005c-p3_1ss11AG	TEA003128.1
stu-MIR8005c-p3_1ss11AG	TEA005520.1
tcc-MIR403a-p5_1ss20TC	TEA028449.1
vvi-miR396a_1ss20TC	TEA000848.1
vvi-miR396a_1ss20TC	TEA000953.1
vvi-miR396a_1ss20TC	TEA001894.1
vvi-miR396a_1ss20TC	TEA014228.1
vvi-miR396a_1ss20TC	TEA018911.1
vvi-miR396a_1ss20TC	TEA022654.1
vvi-miR396a_1ss20TC	TEA024696.1
vvi-miR396a_1ss20TC	TEA026508.1
vvi-miR396a_1ss20TC	TEA027740.1
vvi-miR396a_1ss20TC	TEA028352.1
vvi-miR396a_1ss20TC	TEA028959.1
vvi-miR396a_1ss20TC	TEA030790.1
vvi-miR396a_1ss20TC	TEA033522.1
TEA000223.1	TEA000258.1
TEA000223.1	TEA000659.1
TEA000223.1	TEA000705.1
TEA000223.1	TEA000848.1
TEA000223.1	TEA000953.1
TEA000223.1	TEA001647.1
TEA000223.1	TEA001672.1
TEA000223.1	TEA001714.1
TEA000223.1	TEA001719.1
TEA000223.1	TEA001755.1
TEA000223.1	TEA001894.1
TEA000223.1	TEA002141.1
TEA000223.1	TEA002585.1
TEA000223.1	TEA003128.1
TEA000223.1	TEA004492.1
TEA000223.1	TEA004692.1
TEA000223.1	TEA004965.1
TEA000223.1	TEA005520.1
TEA000223.1	TEA006319.1
TEA000223.1	TEA006584.1
TEA000223.1	TEA008208.1
TEA000223.1	TEA008271.1
TEA000223.1	TEA008702.1
TEA000223.1	TEA008888.1
TEA000223.1	TEA009053.1
TEA000223.1	TEA009565.1
TEA000223.1	TEA010299.1
TEA000223.1	TEA010738.1
TEA000223.1	TEA011325.1
TEA000223.1	TEA011860.1
TEA000223.1	TEA012588.1
TEA000223.1	TEA013303.1
TEA000223.1	TEA013558.1
TEA000223.1	TEA014197.1
TEA000223.1	TEA014228.1
TEA000223.1	TEA014492.1
TEA000223.1	TEA014596.1
TEA000223.1	TEA015861.1
TEA000223.1	TEA016012.1
TEA000223.1	TEA016229.1
TEA000223.1	TEA016725.1
TEA000223.1	TEA016788.1
TEA000223.1	TEA017479.1
TEA000223.1	TEA017759.1
TEA000223.1	TEA018911.1
TEA000223.1	TEA021257.1
TEA000223.1	TEA022654.1
TEA000223.1	TEA023390.1
TEA000223.1	TEA023550.1
TEA000223.1	TEA023795.1
TEA000223.1	TEA024504.1
TEA000223.1	TEA024795.1
TEA000223.1	TEA026508.1
TEA000223.1	TEA027740.1
TEA000223.1	TEA028352.1
TEA000223.1	TEA028449.1
TEA000223.1	TEA029643.1
TEA000223.1	TEA031027.1
TEA000223.1	TEA031238.1
TEA000223.1	TEA031434.1
TEA000223.1	TEA031479.1
TEA000223.1	TEA031554.1
TEA000223.1	TEA031818.1
TEA000223.1	TEA032547.1
TEA000223.1	TEA033198.1
TEA000223.1	TEA033522.1
TEA000234.1	TEA004815.1
TEA000234.1	TEA010267.1
TEA000234.1	TEA010278.1
TEA000234.1	TEA026458.1
TEA000234.1	TEA028111.1
TEA000234.1	TEA028194.1
TEA000234.1	TEA030009.1
TEA000234.1	TEA032217.1
TEA000258.1	TEA009431.1
TEA000258.1	TEA009664.1
TEA000258.1	TEA016463.1
TEA000258.1	TEA023451.1
TEA000659.1	TEA004815.1
TEA000659.1	TEA006735.1
TEA000659.1	TEA007189.1
TEA000659.1	TEA009664.1
TEA000659.1	TEA010267.1
TEA000659.1	TEA010278.1
TEA000659.1	TEA014056.1
TEA000659.1	TEA014166.1
TEA000659.1	TEA015536.1
TEA000659.1	TEA016463.1
TEA000659.1	TEA016716.1
TEA000659.1	TEA016718.1
TEA000659.1	TEA023432.1
TEA000659.1	TEA023444.1
TEA000659.1	TEA023451.1
TEA000659.1	TEA026458.1
TEA000659.1	TEA028194.1
TEA000659.1	TEA030009.1
TEA000659.1	TEA030023.1
TEA000659.1	TEA031627.1
TEA000659.1	TEA032217.1
TEA000659.1	TEA034016.1
TEA000659.1	TEA034032.1
TEA000659.1	TEA034036.1
TEA000705.1	TEA006735.1
TEA000705.1	TEA009664.1
TEA000705.1	TEA010322.1
TEA000705.1	TEA017768.1
TEA000705.1	TEA021535.1
TEA000705.1	TEA022348.1
TEA000705.1	TEA023432.1
TEA000705.1	TEA023444.1
TEA000705.1	TEA023451.1
TEA000705.1	TEA024175.1
TEA000705.1	TEA026458.1
TEA000705.1	TEA028194.1
TEA000705.1	TEA030009.1
TEA000705.1	TEA034036.1
TEA000753.1	TEA001647.1
TEA000753.1	TEA001714.1
TEA000753.1	TEA001755.1
TEA000753.1	TEA006584.1
TEA000753.1	TEA008702.1
TEA000753.1	TEA010299.1
TEA000753.1	TEA010738.1
TEA000753.1	TEA011860.1
TEA000753.1	TEA013303.1
TEA000753.1	TEA014228.1
TEA000753.1	TEA014492.1
TEA000753.1	TEA016725.1
TEA000753.1	TEA017759.1
TEA000753.1	TEA018911.1
TEA000753.1	TEA023795.1
TEA000753.1	TEA024795.1
TEA000753.1	TEA028449.1
TEA000753.1	TEA029643.1
TEA000753.1	TEA031027.1
TEA000753.1	TEA031434.1
TEA000753.1	TEA032547.1
TEA000776.1	TEA006665.1
TEA000776.1	TEA009664.1
TEA000776.1	TEA010322.1
TEA000776.1	TEA017731.1
TEA000776.1	TEA017768.1
TEA000776.1	TEA017916.1
TEA000776.1	TEA021535.1
TEA000776.1	TEA022348.1
TEA000776.1	TEA023432.1
TEA000776.1	TEA023444.1
TEA000776.1	TEA023451.1
TEA000776.1	TEA024175.1
TEA000776.1	TEA028050.1
TEA000776.1	TEA032123.1
TEA000776.1	TEA032991.1
TEA000776.1	TEA034017.1
TEA000776.1	TEA034028.1
TEA000776.1	TEA034036.1
TEA000848.1	TEA006665.1
TEA000848.1	TEA009664.1
TEA000848.1	TEA010322.1
TEA000848.1	TEA010732.1
TEA000848.1	TEA014699.1
TEA000848.1	TEA017731.1
TEA000848.1	TEA017768.1
TEA000848.1	TEA017916.1
TEA000848.1	TEA021535.1
TEA000848.1	TEA022348.1
TEA000848.1	TEA022940.1
TEA000848.1	TEA023432.1
TEA000848.1	TEA023444.1
TEA000848.1	TEA023451.1
TEA000848.1	TEA024175.1
TEA000848.1	TEA028050.1
TEA000848.1	TEA032123.1
TEA000848.1	TEA032730.1
TEA000848.1	TEA032991.1
TEA000848.1	TEA033031.1
TEA000848.1	TEA034006.1
TEA000848.1	TEA034017.1
TEA000848.1	TEA034028.1
TEA000848.1	TEA034036.1
TEA000848.1	TEA034050.1
TEA000953.1	TEA002405.1
TEA000953.1	TEA006665.1
TEA000953.1	TEA006735.1
TEA000953.1	TEA009431.1
TEA000953.1	TEA009664.1
TEA000953.1	TEA010322.1
TEA000953.1	TEA010715.1
TEA000953.1	TEA010732.1
TEA000953.1	TEA014699.1
TEA000953.1	TEA015791.1
TEA000953.1	TEA016463.1
TEA000953.1	TEA017731.1
TEA000953.1	TEA017768.1
TEA000953.1	TEA017916.1
TEA000953.1	TEA021535.1
TEA000953.1	TEA022348.1
TEA000953.1	TEA022940.1
TEA000953.1	TEA023432.1
TEA000953.1	TEA023444.1
TEA000953.1	TEA023451.1
TEA000953.1	TEA024175.1
TEA000953.1	TEA028050.1
TEA000953.1	TEA028194.1
TEA000953.1	TEA032123.1
TEA000953.1	TEA032730.1
TEA000953.1	TEA032991.1
TEA000953.1	TEA033031.1
TEA000953.1	TEA034006.1
TEA000953.1	TEA034017.1
TEA000953.1	TEA034028.1
TEA000953.1	TEA034036.1
TEA000953.1	TEA034050.1
TEA001390.1	TEA010267.1
TEA001390.1	TEA010278.1
TEA001390.1	TEA026458.1
TEA001390.1	TEA028194.1
TEA001390.1	TEA030009.1
TEA001390.1	TEA031627.1
TEA001390.1	TEA032217.1
TEA001647.1	TEA002405.1
TEA001647.1	TEA004815.1
TEA001647.1	TEA006665.1
TEA001647.1	TEA006735.1
TEA001647.1	TEA007189.1
TEA001647.1	TEA009431.1
TEA001647.1	TEA009664.1
TEA001647.1	TEA010267.1
TEA001647.1	TEA010278.1
TEA001647.1	TEA010322.1
TEA001647.1	TEA015248.1
TEA001647.1	TEA015791.1
TEA001647.1	TEA016463.1
TEA001647.1	TEA016469.1
TEA001647.1	TEA016601.1
TEA001647.1	TEA016704.1
TEA001647.1	TEA016716.1
TEA001647.1	TEA016718.1
TEA001647.1	TEA017768.1
TEA001647.1	TEA017916.1
TEA001647.1	TEA021535.1
TEA001647.1	TEA022348.1
TEA001647.1	TEA023432.1
TEA001647.1	TEA023444.1
TEA001647.1	TEA023451.1
TEA001647.1	TEA024175.1
TEA001647.1	TEA026458.1
TEA001647.1	TEA027599.1
TEA001647.1	TEA027829.1
TEA001647.1	TEA028050.1
TEA001647.1	TEA028194.1
TEA001647.1	TEA030009.1
TEA001647.1	TEA031627.1
TEA001647.1	TEA032123.1
TEA001647.1	TEA032730.1
TEA001647.1	TEA032991.1
TEA001647.1	TEA034006.1
TEA001647.1	TEA034017.1
TEA001647.1	TEA034028.1
TEA001647.1	TEA034032.1
TEA001647.1	TEA034036.1
TEA001672.1	TEA006665.1
TEA001672.1	TEA006735.1
TEA001672.1	TEA009664.1
TEA001672.1	TEA010322.1
TEA001672.1	TEA015248.1
TEA001672.1	TEA016463.1
TEA001672.1	TEA017768.1
TEA001672.1	TEA021535.1
TEA001672.1	TEA022348.1
TEA001672.1	TEA023432.1
TEA001672.1	TEA023444.1
TEA001672.1	TEA023451.1
TEA001672.1	TEA024175.1
TEA001672.1	TEA028194.1
TEA001672.1	TEA030009.1
TEA001672.1	TEA034036.1
TEA001714.1	TEA004815.1
TEA001714.1	TEA006735.1
TEA001714.1	TEA007189.1
TEA001714.1	TEA009431.1
TEA001714.1	TEA009664.1
TEA001714.1	TEA010267.1
TEA001714.1	TEA010278.1
TEA001714.1	TEA014056.1
TEA001714.1	TEA014166.1
TEA001714.1	TEA015248.1
TEA001714.1	TEA015536.1
TEA001714.1	TEA016463.1
TEA001714.1	TEA016601.1
TEA001714.1	TEA016704.1
TEA001714.1	TEA016716.1
TEA001714.1	TEA016718.1
TEA001714.1	TEA017768.1
TEA001714.1	TEA021535.1
TEA001714.1	TEA022348.1
TEA001714.1	TEA023432.1
TEA001714.1	TEA023444.1
TEA001714.1	TEA023451.1
TEA001714.1	TEA024175.1
TEA001714.1	TEA025393.1
TEA001714.1	TEA026458.1
TEA001714.1	TEA027599.1
TEA001714.1	TEA027829.1
TEA001714.1	TEA028194.1
TEA001714.1	TEA030009.1
TEA001714.1	TEA030023.1
TEA001714.1	TEA031627.1
TEA001714.1	TEA032217.1
TEA001714.1	TEA034016.1
TEA001714.1	TEA034032.1
TEA001719.1	TEA006735.1
TEA001719.1	TEA009664.1
TEA001719.1	TEA010267.1
TEA001719.1	TEA010278.1
TEA001719.1	TEA015536.1
TEA001719.1	TEA016704.1
TEA001719.1	TEA016716.1
TEA001719.1	TEA023451.1
TEA001719.1	TEA025393.1
TEA001719.1	TEA026458.1
TEA001719.1	TEA028194.1
TEA001719.1	TEA030009.1
TEA001719.1	TEA030023.1
TEA001719.1	TEA031627.1
TEA001719.1	TEA032217.1
TEA001719.1	TEA034016.1
TEA001755.1	TEA002405.1
TEA001755.1	TEA006665.1
TEA001755.1	TEA006735.1
TEA001755.1	TEA007189.1
TEA001755.1	TEA009431.1
TEA001755.1	TEA009664.1
TEA001755.1	TEA010322.1
TEA001755.1	TEA010715.1
TEA001755.1	TEA010732.1
TEA001755.1	TEA015248.1
TEA001755.1	TEA015791.1
TEA001755.1	TEA016463.1
TEA001755.1	TEA016469.1
TEA001755.1	TEA016601.1
TEA001755.1	TEA016716.1
TEA001755.1	TEA016718.1
TEA001755.1	TEA017731.1
TEA001755.1	TEA017768.1
TEA001755.1	TEA017916.1
TEA001755.1	TEA021535.1
TEA001755.1	TEA022348.1
TEA001755.1	TEA022940.1
TEA001755.1	TEA023432.1
TEA001755.1	TEA023444.1
TEA001755.1	TEA023451.1
TEA001755.1	TEA024175.1
TEA001755.1	TEA027599.1
TEA001755.1	TEA027829.1
TEA001755.1	TEA028050.1
TEA001755.1	TEA028194.1
TEA001755.1	TEA030009.1
TEA001755.1	TEA032123.1
TEA001755.1	TEA032730.1
TEA001755.1	TEA032991.1
TEA001755.1	TEA034006.1
TEA001755.1	TEA034017.1
TEA001755.1	TEA034028.1
TEA001755.1	TEA034036.1
TEA001755.1	TEA034050.1
TEA001894.1	TEA006665.1
TEA001894.1	TEA009664.1
TEA001894.1	TEA010322.1
TEA001894.1	TEA010715.1
TEA001894.1	TEA010732.1
TEA001894.1	TEA014699.1
TEA001894.1	TEA015791.1
TEA001894.1	TEA016463.1
TEA001894.1	TEA017731.1
TEA001894.1	TEA017768.1
TEA001894.1	TEA017916.1
TEA001894.1	TEA021535.1
TEA001894.1	TEA022348.1
TEA001894.1	TEA022940.1
TEA001894.1	TEA023432.1
TEA001894.1	TEA023444.1
TEA001894.1	TEA023451.1
TEA001894.1	TEA024175.1
TEA001894.1	TEA028050.1
TEA001894.1	TEA032123.1
TEA001894.1	TEA032730.1
TEA001894.1	TEA032991.1
TEA001894.1	TEA033031.1
TEA001894.1	TEA034006.1
TEA001894.1	TEA034017.1
TEA001894.1	TEA034028.1
TEA001894.1	TEA034036.1
TEA001894.1	TEA034050.1
TEA002141.1	TEA003137.1
TEA002141.1	TEA006665.1
TEA002141.1	TEA009431.1
TEA002141.1	TEA009664.1
TEA002141.1	TEA010322.1
TEA002141.1	TEA010715.1
TEA002141.1	TEA010732.1
TEA002141.1	TEA015791.1
TEA002141.1	TEA016463.1
TEA002141.1	TEA016469.1
TEA002141.1	TEA017731.1
TEA002141.1	TEA017768.1
TEA002141.1	TEA017916.1
TEA002141.1	TEA021535.1
TEA002141.1	TEA022348.1
TEA002141.1	TEA023432.1
TEA002141.1	TEA023444.1
TEA002141.1	TEA023451.1
TEA002141.1	TEA024175.1
TEA002141.1	TEA028050.1
TEA002141.1	TEA032123.1
TEA002141.1	TEA032730.1
TEA002141.1	TEA032991.1
TEA002141.1	TEA034017.1
TEA002141.1	TEA034028.1
TEA002141.1	TEA034036.1
TEA002141.1	TEA034050.1
TEA002405.1	TEA006584.1
TEA002405.1	TEA008702.1
TEA002405.1	TEA010299.1
TEA002405.1	TEA013303.1
TEA002405.1	TEA014228.1
TEA002405.1	TEA015861.1
TEA002405.1	TEA018911.1
TEA002405.1	TEA023795.1
TEA002405.1	TEA024795.1
TEA002405.1	TEA027740.1
TEA002405.1	TEA028449.1
TEA002585.1	TEA004815.1
TEA002585.1	TEA006735.1
TEA002585.1	TEA007189.1
TEA002585.1	TEA009431.1
TEA002585.1	TEA009664.1
TEA002585.1	TEA010267.1
TEA002585.1	TEA010278.1
TEA002585.1	TEA014056.1
TEA002585.1	TEA014166.1
TEA002585.1	TEA015248.1
TEA002585.1	TEA015536.1
TEA002585.1	TEA016463.1
TEA002585.1	TEA016601.1
TEA002585.1	TEA016704.1
TEA002585.1	TEA016716.1
TEA002585.1	TEA016718.1
TEA002585.1	TEA017768.1
TEA002585.1	TEA022348.1
TEA002585.1	TEA023432.1
TEA002585.1	TEA023444.1
TEA002585.1	TEA023451.1
TEA002585.1	TEA024175.1
TEA002585.1	TEA025393.1
TEA002585.1	TEA026458.1
TEA002585.1	TEA027599.1
TEA002585.1	TEA027829.1
TEA002585.1	TEA028111.1
TEA002585.1	TEA028194.1
TEA002585.1	TEA030009.1
TEA002585.1	TEA030023.1
TEA002585.1	TEA031627.1
TEA002585.1	TEA032217.1
TEA002585.1	TEA032730.1
TEA002585.1	TEA034016.1
TEA002585.1	TEA034032.1
TEA003128.1	TEA006665.1
TEA003128.1	TEA006735.1
TEA003128.1	TEA007189.1
TEA003128.1	TEA009431.1
TEA003128.1	TEA009664.1
TEA003128.1	TEA010322.1
TEA003128.1	TEA010715.1
TEA003128.1	TEA010732.1
TEA003128.1	TEA015248.1
TEA003128.1	TEA015791.1
TEA003128.1	TEA016463.1
TEA003128.1	TEA016469.1
TEA003128.1	TEA017768.1
TEA003128.1	TEA017916.1
TEA003128.1	TEA021535.1
TEA003128.1	TEA022348.1
TEA003128.1	TEA023432.1
TEA003128.1	TEA023444.1
TEA003128.1	TEA023451.1
TEA003128.1	TEA024175.1
TEA003128.1	TEA027599.1
TEA003128.1	TEA028050.1
TEA003128.1	TEA028194.1
TEA003128.1	TEA030009.1
TEA003128.1	TEA032123.1
TEA003128.1	TEA032730.1
TEA003128.1	TEA032991.1
TEA003128.1	TEA034006.1
TEA003128.1	TEA034017.1
TEA003128.1	TEA034028.1
TEA003128.1	TEA034036.1
TEA003128.1	TEA034050.1
TEA003137.1	TEA032547.1
TEA004376.1	TEA010267.1
TEA004376.1	TEA010278.1
TEA004376.1	TEA026458.1
TEA004376.1	TEA028194.1
TEA004376.1	TEA030009.1
TEA004376.1	TEA031627.1
TEA004376.1	TEA032217.1
TEA004492.1	TEA006665.1
TEA004492.1	TEA006735.1
TEA004492.1	TEA009664.1
TEA004492.1	TEA010322.1
TEA004492.1	TEA015248.1
TEA004492.1	TEA016463.1
TEA004492.1	TEA017768.1
TEA004492.1	TEA021535.1
TEA004492.1	TEA022348.1
TEA004492.1	TEA023432.1
TEA004492.1	TEA023444.1
TEA004492.1	TEA023451.1
TEA004492.1	TEA024175.1
TEA004492.1	TEA028050.1
TEA004492.1	TEA028194.1
TEA004492.1	TEA030009.1
TEA004492.1	TEA032730.1
TEA004492.1	TEA034036.1
TEA004547.1	TEA009777.1
TEA004692.1	TEA004815.1
TEA004692.1	TEA006735.1
TEA004692.1	TEA009431.1
TEA004692.1	TEA009664.1
TEA004692.1	TEA010267.1
TEA004692.1	TEA016463.1
TEA004692.1	TEA016716.1
TEA004692.1	TEA016718.1
TEA004692.1	TEA017768.1
TEA004692.1	TEA021535.1
TEA004692.1	TEA022348.1
TEA004692.1	TEA023432.1
TEA004692.1	TEA023444.1
TEA004692.1	TEA023451.1
TEA004692.1	TEA024175.1
TEA004692.1	TEA026458.1
TEA004692.1	TEA027599.1
TEA004692.1	TEA028194.1
TEA004692.1	TEA030009.1
TEA004692.1	TEA032730.1
TEA004692.1	TEA034036.1
TEA004815.1	TEA006319.1
TEA004815.1	TEA006584.1
TEA004815.1	TEA010299.1
TEA004815.1	TEA010738.1
TEA004815.1	TEA011367.1
TEA004815.1	TEA012588.1
TEA004815.1	TEA013558.1
TEA004815.1	TEA014197.1
TEA004815.1	TEA014492.1
TEA004815.1	TEA014596.1
TEA004815.1	TEA016012.1
TEA004815.1	TEA016229.1
TEA004815.1	TEA016725.1
TEA004815.1	TEA024504.1
TEA004815.1	TEA024795.1
TEA004815.1	TEA024991.1
TEA004815.1	TEA028449.1
TEA004815.1	TEA029437.1
TEA004815.1	TEA031434.1
TEA004906.1	TEA025970.1
TEA004965.1	TEA006735.1
TEA004965.1	TEA010322.1
TEA004965.1	TEA015248.1
TEA004965.1	TEA017768.1
TEA004965.1	TEA021535.1
TEA004965.1	TEA022348.1
TEA004965.1	TEA023432.1
TEA004965.1	TEA023444.1
TEA004965.1	TEA023451.1
TEA004965.1	TEA024175.1
TEA004965.1	TEA028194.1
TEA004965.1	TEA030009.1
TEA004965.1	TEA034036.1
TEA005520.1	TEA006665.1
TEA005520.1	TEA006735.1
TEA005520.1	TEA007189.1
TEA005520.1	TEA009431.1
TEA005520.1	TEA009664.1
TEA005520.1	TEA010322.1
TEA005520.1	TEA010715.1
TEA005520.1	TEA010732.1
TEA005520.1	TEA015791.1
TEA005520.1	TEA016463.1
TEA005520.1	TEA016469.1
TEA005520.1	TEA017731.1
TEA005520.1	TEA017768.1
TEA005520.1	TEA017916.1
TEA005520.1	TEA021535.1
TEA005520.1	TEA022348.1
TEA005520.1	TEA022940.1
TEA005520.1	TEA023432.1
TEA005520.1	TEA023444.1
TEA005520.1	TEA023451.1
TEA005520.1	TEA024175.1
TEA005520.1	TEA027599.1
TEA005520.1	TEA028050.1
TEA005520.1	TEA028194.1
TEA005520.1	TEA032123.1
TEA005520.1	TEA032730.1
TEA005520.1	TEA032991.1
TEA005520.1	TEA034006.1
TEA005520.1	TEA034017.1
TEA005520.1	TEA034028.1
TEA005520.1	TEA034036.1
TEA005520.1	TEA034050.1
TEA005648.1	TEA009777.1
TEA006319.1	TEA009664.1
TEA006319.1	TEA010267.1
TEA006319.1	TEA010278.1
TEA006319.1	TEA016463.1
TEA006319.1	TEA016716.1
TEA006319.1	TEA023451.1
TEA006319.1	TEA026458.1
TEA006319.1	TEA028194.1
TEA006319.1	TEA030009.1
TEA006319.1	TEA031627.1
TEA006319.1	TEA032217.1
TEA006319.1	TEA034032.1
TEA006584.1	TEA006665.1
TEA006584.1	TEA006735.1
TEA006584.1	TEA007189.1
TEA006584.1	TEA009431.1
TEA006584.1	TEA009664.1
TEA006584.1	TEA010278.1
TEA006584.1	TEA010322.1
TEA006584.1	TEA010715.1
TEA006584.1	TEA010732.1
TEA006584.1	TEA015248.1
TEA006584.1	TEA015791.1
TEA006584.1	TEA016463.1
TEA006584.1	TEA016469.1
TEA006584.1	TEA016601.1
TEA006584.1	TEA016716.1
TEA006584.1	TEA016718.1
TEA006584.1	TEA017768.1
TEA006584.1	TEA017916.1
TEA006584.1	TEA021535.1
TEA006584.1	TEA022348.1
TEA006584.1	TEA022940.1
TEA006584.1	TEA023432.1
TEA006584.1	TEA023444.1
TEA006584.1	TEA023451.1
TEA006584.1	TEA024175.1
TEA006584.1	TEA027599.1
TEA006584.1	TEA027829.1
TEA006584.1	TEA028050.1
TEA006584.1	TEA028194.1
TEA006584.1	TEA030009.1
TEA006584.1	TEA032123.1
TEA006584.1	TEA032730.1
TEA006584.1	TEA032991.1
TEA006584.1	TEA034006.1
TEA006584.1	TEA034017.1
TEA006584.1	TEA034028.1
TEA006584.1	TEA034036.1
TEA006584.1	TEA034050.1
TEA006665.1	TEA008208.1
TEA006665.1	TEA008271.1
TEA006665.1	TEA008702.1
TEA006665.1	TEA008888.1
TEA006665.1	TEA009565.1
TEA006665.1	TEA010299.1
TEA006665.1	TEA011325.1
TEA006665.1	TEA011860.1
TEA006665.1	TEA012588.1
TEA006665.1	TEA013303.1
TEA006665.1	TEA014228.1
TEA006665.1	TEA014492.1
TEA006665.1	TEA015861.1
TEA006665.1	TEA016725.1
TEA006665.1	TEA017479.1
TEA006665.1	TEA017759.1
TEA006665.1	TEA018911.1
TEA006665.1	TEA022654.1
TEA006665.1	TEA023390.1
TEA006665.1	TEA023550.1
TEA006665.1	TEA023795.1
TEA006665.1	TEA024696.1
TEA006665.1	TEA024795.1
TEA006665.1	TEA026508.1
TEA006665.1	TEA027740.1
TEA006665.1	TEA028352.1
TEA006665.1	TEA028449.1
TEA006665.1	TEA029643.1
TEA006665.1	TEA030790.1
TEA006665.1	TEA031027.1
TEA006665.1	TEA031238.1
TEA006665.1	TEA031479.1
TEA006665.1	TEA032547.1
TEA006665.1	TEA033198.1
TEA006665.1	TEA033522.1
TEA006735.1	TEA007610.1
TEA006735.1	TEA008208.1
TEA006735.1	TEA008271.1
TEA006735.1	TEA008702.1
TEA006735.1	TEA009053.1
TEA006735.1	TEA009565.1
TEA006735.1	TEA010299.1
TEA006735.1	TEA010738.1
TEA006735.1	TEA011325.1
TEA006735.1	TEA011860.1
TEA006735.1	TEA012588.1
TEA006735.1	TEA013303.1
TEA006735.1	TEA014228.1
TEA006735.1	TEA014492.1
TEA006735.1	TEA015861.1
TEA006735.1	TEA016012.1
TEA006735.1	TEA016229.1
TEA006735.1	TEA016725.1
TEA006735.1	TEA017479.1
TEA006735.1	TEA017759.1
TEA006735.1	TEA018911.1
TEA006735.1	TEA021257.1
TEA006735.1	TEA022654.1
TEA006735.1	TEA023390.1
TEA006735.1	TEA023526.1
TEA006735.1	TEA023795.1
TEA006735.1	TEA024504.1
TEA006735.1	TEA024795.1
TEA006735.1	TEA027740.1
TEA006735.1	TEA028449.1
TEA006735.1	TEA029643.1
TEA006735.1	TEA031027.1
TEA006735.1	TEA031238.1
TEA006735.1	TEA031434.1
TEA006735.1	TEA031479.1
TEA006735.1	TEA031554.1
TEA006735.1	TEA032547.1
TEA006735.1	TEA033198.1
TEA006735.1	TEA033522.1
TEA007189.1	TEA010299.1
TEA007189.1	TEA010738.1
TEA007189.1	TEA011367.1
TEA007189.1	TEA012588.1
TEA007189.1	TEA013303.1
TEA007189.1	TEA014228.1
TEA007189.1	TEA014492.1
TEA007189.1	TEA016725.1
TEA007189.1	TEA018911.1
TEA007189.1	TEA023795.1
TEA007189.1	TEA024795.1
TEA007189.1	TEA028449.1
TEA007189.1	TEA031027.1
TEA007189.1	TEA031434.1
TEA007189.1	TEA032547.1
TEA007295.1	TEA009777.1
TEA007610.1	TEA028194.1
TEA007610.1	TEA030009.1
TEA007658.1	TEA010299.1
TEA007658.1	TEA024795.1
TEA007658.1	TEA028449.1
TEA008208.1	TEA009664.1
TEA008208.1	TEA010322.1
TEA008208.1	TEA015248.1
TEA008208.1	TEA016463.1
TEA008208.1	TEA017768.1
TEA008208.1	TEA021535.1
TEA008208.1	TEA022348.1
TEA008208.1	TEA023432.1
TEA008208.1	TEA023444.1
TEA008208.1	TEA023451.1
TEA008208.1	TEA024175.1
TEA008208.1	TEA028050.1
TEA008208.1	TEA028194.1
TEA008208.1	TEA030009.1
TEA008208.1	TEA032730.1
TEA008208.1	TEA034036.1
TEA008271.1	TEA009431.1
TEA008271.1	TEA009664.1
TEA008271.1	TEA010322.1
TEA008271.1	TEA016463.1
TEA008271.1	TEA017768.1
TEA008271.1	TEA021535.1
TEA008271.1	TEA022348.1
TEA008271.1	TEA023432.1
TEA008271.1	TEA023444.1
TEA008271.1	TEA023451.1
TEA008271.1	TEA024175.1
TEA008271.1	TEA028050.1
TEA008271.1	TEA028194.1
TEA008271.1	TEA030009.1
TEA008271.1	TEA032730.1
TEA008271.1	TEA034036.1
TEA008357.1	TEA010380.1
TEA008702.1	TEA009664.1
TEA008702.1	TEA010322.1
TEA008702.1	TEA010732.1
TEA008702.1	TEA015248.1
TEA008702.1	TEA015791.1
TEA008702.1	TEA016463.1
TEA008702.1	TEA016601.1
TEA008702.1	TEA016718.1
TEA008702.1	TEA017768.1
TEA008702.1	TEA017916.1
TEA008702.1	TEA021535.1
TEA008702.1	TEA022348.1
TEA008702.1	TEA023432.1
TEA008702.1	TEA023444.1
TEA008702.1	TEA023451.1
TEA008702.1	TEA024175.1
TEA008702.1	TEA028050.1
TEA008702.1	TEA028194.1
TEA008702.1	TEA030009.1
TEA008702.1	TEA032730.1
TEA008702.1	TEA032991.1
TEA008702.1	TEA034006.1
TEA008702.1	TEA034036.1
TEA008888.1	TEA009431.1
TEA008888.1	TEA009664.1
TEA008888.1	TEA010322.1
TEA008888.1	TEA016463.1
TEA008888.1	TEA017768.1
TEA008888.1	TEA021535.1
TEA008888.1	TEA022348.1
TEA008888.1	TEA023432.1
TEA008888.1	TEA023444.1
TEA008888.1	TEA023451.1
TEA008888.1	TEA024175.1
TEA008888.1	TEA028050.1
TEA008888.1	TEA032123.1
TEA008888.1	TEA032730.1
TEA008888.1	TEA032991.1
TEA008888.1	TEA034017.1
TEA008888.1	TEA034036.1
TEA009053.1	TEA009664.1
TEA009053.1	TEA016463.1
TEA009053.1	TEA021535.1
TEA009053.1	TEA022348.1
TEA009053.1	TEA023432.1
TEA009053.1	TEA023444.1
TEA009053.1	TEA023451.1
TEA009053.1	TEA024175.1
TEA009053.1	TEA027599.1
TEA009053.1	TEA028194.1
TEA009053.1	TEA030009.1
TEA009431.1	TEA010299.1
TEA009431.1	TEA010738.1
TEA009431.1	TEA011325.1
TEA009431.1	TEA011860.1
TEA009431.1	TEA012588.1
TEA009431.1	TEA013303.1
TEA009431.1	TEA014197.1
TEA009431.1	TEA014228.1
TEA009431.1	TEA014492.1
TEA009431.1	TEA015861.1
TEA009431.1	TEA016229.1
TEA009431.1	TEA016725.1
TEA009431.1	TEA017479.1
TEA009431.1	TEA017759.1
TEA009431.1	TEA018911.1
TEA009431.1	TEA022654.1
TEA009431.1	TEA023550.1
TEA009431.1	TEA023795.1
TEA009431.1	TEA024795.1
TEA009431.1	TEA028449.1
TEA009431.1	TEA031027.1
TEA009431.1	TEA031434.1
TEA009431.1	TEA031479.1
TEA009431.1	TEA032547.1
TEA009431.1	TEA033522.1
TEA009565.1	TEA009664.1
TEA009565.1	TEA010322.1
TEA009565.1	TEA016463.1
TEA009565.1	TEA017768.1
TEA009565.1	TEA021535.1
TEA009565.1	TEA022348.1
TEA009565.1	TEA023432.1
TEA009565.1	TEA023444.1
TEA009565.1	TEA023451.1
TEA009565.1	TEA024175.1
TEA009565.1	TEA028194.1
TEA009565.1	TEA030009.1
TEA009565.1	TEA034036.1
TEA009664.1	TEA010299.1
TEA009664.1	TEA010738.1
TEA009664.1	TEA011325.1
TEA009664.1	TEA011860.1
TEA009664.1	TEA012588.1
TEA009664.1	TEA013303.1
TEA009664.1	TEA013558.1
TEA009664.1	TEA014197.1
TEA009664.1	TEA014228.1
TEA009664.1	TEA014492.1
TEA009664.1	TEA015861.1
TEA009664.1	TEA016012.1
TEA009664.1	TEA016229.1
TEA009664.1	TEA016725.1
TEA009664.1	TEA017479.1
TEA009664.1	TEA017759.1
TEA009664.1	TEA018911.1
TEA009664.1	TEA021257.1
TEA009664.1	TEA022654.1
TEA009664.1	TEA023390.1
TEA009664.1	TEA023550.1
TEA009664.1	TEA023795.1
TEA009664.1	TEA024504.1
TEA009664.1	TEA024795.1
TEA009664.1	TEA026508.1
TEA009664.1	TEA027740.1
TEA009664.1	TEA028352.1
TEA009664.1	TEA028449.1
TEA009664.1	TEA029643.1
TEA009664.1	TEA031027.1
TEA009664.1	TEA031238.1
TEA009664.1	TEA031434.1
TEA009664.1	TEA031479.1
TEA009664.1	TEA031554.1
TEA009664.1	TEA032547.1
TEA009664.1	TEA033198.1
TEA009664.1	TEA033522.1
TEA009777.1	TEA015241.1
TEA009777.1	TEA016295.1
TEA009777.1	TEA028959.1
TEA010267.1	TEA010299.1
TEA010267.1	TEA010738.1
TEA010267.1	TEA011367.1
TEA010267.1	TEA013558.1
TEA010267.1	TEA014197.1
TEA010267.1	TEA014596.1
TEA010267.1	TEA016012.1
TEA010267.1	TEA016229.1
TEA010267.1	TEA016725.1
TEA010267.1	TEA017070.1
TEA010267.1	TEA019245.1
TEA010267.1	TEA024504.1
TEA010267.1	TEA024991.1
TEA010267.1	TEA025970.1
TEA010267.1	TEA029437.1
TEA010267.1	TEA031434.1
TEA010267.1	TEA031818.1
TEA010278.1	TEA010299.1
TEA010278.1	TEA010738.1
TEA010278.1	TEA011367.1
TEA010278.1	TEA012588.1
TEA010278.1	TEA013558.1
TEA010278.1	TEA016725.1
TEA010278.1	TEA024504.1
TEA010278.1	TEA028449.1
TEA010278.1	TEA031434.1
TEA010278.1	TEA033198.1
TEA010299.1	TEA010322.1
TEA010299.1	TEA010715.1
TEA010299.1	TEA010732.1
TEA010299.1	TEA015248.1
TEA010299.1	TEA015791.1
TEA010299.1	TEA016463.1
TEA010299.1	TEA016469.1
TEA010299.1	TEA016601.1
TEA010299.1	TEA016716.1
TEA010299.1	TEA016718.1
TEA010299.1	TEA017768.1
TEA010299.1	TEA017916.1
TEA010299.1	TEA021535.1
TEA010299.1	TEA022348.1
TEA010299.1	TEA023432.1
TEA010299.1	TEA023444.1
TEA010299.1	TEA023451.1
TEA010299.1	TEA024175.1
TEA010299.1	TEA026458.1
TEA010299.1	TEA027599.1
TEA010299.1	TEA027829.1
TEA010299.1	TEA028050.1
TEA010299.1	TEA028194.1
TEA010299.1	TEA030009.1
TEA010299.1	TEA031627.1
TEA010299.1	TEA032123.1
TEA010299.1	TEA032730.1
TEA010299.1	TEA032991.1
TEA010299.1	TEA034006.1
TEA010299.1	TEA034017.1
TEA010299.1	TEA034028.1
TEA010299.1	TEA034032.1
TEA010299.1	TEA034036.1
TEA010322.1	TEA011325.1
TEA010322.1	TEA011860.1
TEA010322.1	TEA012588.1
TEA010322.1	TEA013303.1
TEA010322.1	TEA014228.1
TEA010322.1	TEA014492.1
TEA010322.1	TEA015861.1
TEA010322.1	TEA016725.1
TEA010322.1	TEA017479.1
TEA010322.1	TEA017759.1
TEA010322.1	TEA018911.1
TEA010322.1	TEA021257.1
TEA010322.1	TEA022654.1
TEA010322.1	TEA023390.1
TEA010322.1	TEA023526.1
TEA010322.1	TEA023795.1
TEA010322.1	TEA024696.1
TEA010322.1	TEA024795.1
TEA010322.1	TEA026508.1
TEA010322.1	TEA027740.1
TEA010322.1	TEA028352.1
TEA010322.1	TEA028449.1
TEA010322.1	TEA029643.1
TEA010322.1	TEA030790.1
TEA010322.1	TEA031027.1
TEA010322.1	TEA031238.1
TEA010322.1	TEA031554.1
TEA010322.1	TEA032547.1
TEA010322.1	TEA033522.1
TEA010588.1	TEA024991.1
TEA010715.1	TEA011325.1
TEA010715.1	TEA011860.1
TEA010715.1	TEA013303.1
TEA010715.1	TEA014228.1
TEA010715.1	TEA015861.1
TEA010715.1	TEA017759.1
TEA010715.1	TEA018911.1
TEA010715.1	TEA022654.1
TEA010715.1	TEA023795.1
TEA010715.1	TEA024696.1
TEA010715.1	TEA024795.1
TEA010715.1	TEA026508.1
TEA010715.1	TEA027740.1
TEA010715.1	TEA028352.1
TEA010715.1	TEA030790.1
TEA010715.1	TEA032547.1
TEA010732.1	TEA011325.1
TEA010732.1	TEA011860.1
TEA010732.1	TEA013303.1
TEA010732.1	TEA014228.1
TEA010732.1	TEA015861.1
TEA010732.1	TEA017759.1
TEA010732.1	TEA018911.1
TEA010732.1	TEA022654.1
TEA010732.1	TEA023795.1
TEA010732.1	TEA024696.1
TEA010732.1	TEA024795.1
TEA010732.1	TEA026508.1
TEA010732.1	TEA027740.1
TEA010732.1	TEA028352.1
TEA010732.1	TEA028449.1
TEA010732.1	TEA030790.1
TEA010732.1	TEA031027.1
TEA010732.1	TEA031238.1
TEA010732.1	TEA032547.1
TEA010738.1	TEA014056.1
TEA010738.1	TEA014166.1
TEA010738.1	TEA015248.1
TEA010738.1	TEA015536.1
TEA010738.1	TEA016463.1
TEA010738.1	TEA016601.1
TEA010738.1	TEA016704.1
TEA010738.1	TEA016716.1
TEA010738.1	TEA016718.1
TEA010738.1	TEA022348.1
TEA010738.1	TEA023432.1
TEA010738.1	TEA023451.1
TEA010738.1	TEA025393.1
TEA010738.1	TEA026458.1
TEA010738.1	TEA027599.1
TEA010738.1	TEA027829.1
TEA010738.1	TEA028111.1
TEA010738.1	TEA028194.1
TEA010738.1	TEA030009.1
TEA010738.1	TEA030023.1
TEA010738.1	TEA031627.1
TEA010738.1	TEA032217.1
TEA010738.1	TEA034016.1
TEA010738.1	TEA034032.1
TEA010779.1	TEA026458.1
TEA010779.1	TEA028194.1
TEA010779.1	TEA030009.1
TEA011325.1	TEA015791.1
TEA011325.1	TEA016463.1
TEA011325.1	TEA016469.1
TEA011325.1	TEA017768.1
TEA011325.1	TEA017916.1
TEA011325.1	TEA021535.1
TEA011325.1	TEA022348.1
TEA011325.1	TEA022940.1
TEA011325.1	TEA023432.1
TEA011325.1	TEA023444.1
TEA011325.1	TEA023451.1
TEA011325.1	TEA024175.1
TEA011325.1	TEA027599.1
TEA011325.1	TEA028050.1
TEA011325.1	TEA028194.1
TEA011325.1	TEA032123.1
TEA011325.1	TEA032730.1
TEA011325.1	TEA032991.1
TEA011325.1	TEA034006.1
TEA011325.1	TEA034017.1
TEA011325.1	TEA034028.1
TEA011325.1	TEA034036.1
TEA011325.1	TEA034050.1
TEA011367.1	TEA014056.1
TEA011367.1	TEA014166.1
TEA011367.1	TEA015536.1
TEA011367.1	TEA016704.1
TEA011367.1	TEA016716.1
TEA011367.1	TEA016718.1
TEA011367.1	TEA023451.1
TEA011367.1	TEA025393.1
TEA011367.1	TEA026458.1
TEA011367.1	TEA028111.1
TEA011367.1	TEA028194.1
TEA011367.1	TEA030009.1
TEA011367.1	TEA030023.1
TEA011367.1	TEA031627.1
TEA011367.1	TEA032217.1
TEA011367.1	TEA034016.1
TEA011367.1	TEA034032.1
TEA011860.1	TEA015791.1
TEA011860.1	TEA016463.1
TEA011860.1	TEA016469.1
TEA011860.1	TEA017768.1
TEA011860.1	TEA017916.1
TEA011860.1	TEA021535.1
TEA011860.1	TEA022348.1
TEA011860.1	TEA022940.1
TEA011860.1	TEA023432.1
TEA011860.1	TEA023444.1
TEA011860.1	TEA023451.1
TEA011860.1	TEA024175.1
TEA011860.1	TEA028050.1
TEA011860.1	TEA028194.1
TEA011860.1	TEA032123.1
TEA011860.1	TEA032730.1
TEA011860.1	TEA032991.1
TEA011860.1	TEA034006.1
TEA011860.1	TEA034017.1
TEA011860.1	TEA034028.1
TEA011860.1	TEA034036.1
TEA011860.1	TEA034050.1
TEA012588.1	TEA015248.1
TEA012588.1	TEA015791.1
TEA012588.1	TEA016463.1
TEA012588.1	TEA016469.1
TEA012588.1	TEA016601.1
TEA012588.1	TEA016716.1
TEA012588.1	TEA016718.1
TEA012588.1	TEA017768.1
TEA012588.1	TEA021535.1
TEA012588.1	TEA022348.1
TEA012588.1	TEA023432.1
TEA012588.1	TEA023444.1
TEA012588.1	TEA023451.1
TEA012588.1	TEA024175.1
TEA012588.1	TEA026458.1
TEA012588.1	TEA027599.1
TEA012588.1	TEA027829.1
TEA012588.1	TEA028050.1
TEA012588.1	TEA028194.1
TEA012588.1	TEA030009.1
TEA012588.1	TEA032123.1
TEA012588.1	TEA032730.1
TEA012588.1	TEA032991.1
TEA012588.1	TEA034036.1
TEA013303.1	TEA015248.1
TEA013303.1	TEA015791.1
TEA013303.1	TEA016463.1
TEA013303.1	TEA016469.1
TEA013303.1	TEA016601.1
TEA013303.1	TEA016718.1
TEA013303.1	TEA017731.1
TEA013303.1	TEA017768.1
TEA013303.1	TEA017916.1
TEA013303.1	TEA021535.1
TEA013303.1	TEA022348.1
TEA013303.1	TEA022940.1
TEA013303.1	TEA023432.1
TEA013303.1	TEA023444.1
TEA013303.1	TEA023451.1
TEA013303.1	TEA024175.1
TEA013303.1	TEA027599.1
TEA013303.1	TEA027829.1
TEA013303.1	TEA028050.1
TEA013303.1	TEA028194.1
TEA013303.1	TEA030009.1
TEA013303.1	TEA032123.1
TEA013303.1	TEA032730.1
TEA013303.1	TEA032991.1
TEA013303.1	TEA034006.1
TEA013303.1	TEA034017.1
TEA013303.1	TEA034028.1
TEA013303.1	TEA034036.1
TEA013303.1	TEA034050.1
TEA013558.1	TEA015536.1
TEA013558.1	TEA016463.1
TEA013558.1	TEA023451.1
TEA013558.1	TEA026458.1
TEA013558.1	TEA027829.1
TEA013558.1	TEA028194.1
TEA013558.1	TEA030009.1
TEA013558.1	TEA031627.1
TEA013558.1	TEA032217.1
TEA013558.1	TEA034016.1
TEA013558.1	TEA034032.1
TEA014056.1	TEA016725.1
TEA014056.1	TEA024991.1
TEA014056.1	TEA031434.1
TEA014166.1	TEA016725.1
TEA014166.1	TEA024504.1
TEA014166.1	TEA024991.1
TEA014166.1	TEA025970.1
TEA014166.1	TEA031434.1
TEA014166.1	TEA031818.1
TEA014197.1	TEA016463.1
TEA014197.1	TEA016716.1
TEA014197.1	TEA023432.1
TEA014197.1	TEA023444.1
TEA014197.1	TEA023451.1
TEA014197.1	TEA026458.1
TEA014197.1	TEA027599.1
TEA014197.1	TEA028194.1
TEA014197.1	TEA030009.1
TEA014197.1	TEA034032.1
TEA014197.1	TEA034036.1
TEA014228.1	TEA014699.1
TEA014228.1	TEA015248.1
TEA014228.1	TEA015791.1
TEA014228.1	TEA016463.1
TEA014228.1	TEA016469.1
TEA014228.1	TEA016601.1
TEA014228.1	TEA016716.1
TEA014228.1	TEA016718.1
TEA014228.1	TEA017731.1
TEA014228.1	TEA017768.1
TEA014228.1	TEA017916.1
TEA014228.1	TEA021535.1
TEA014228.1	TEA022348.1
TEA014228.1	TEA022940.1
TEA014228.1	TEA023432.1
TEA014228.1	TEA023444.1
TEA014228.1	TEA023451.1
TEA014228.1	TEA024175.1
TEA014228.1	TEA027599.1
TEA014228.1	TEA027829.1
TEA014228.1	TEA028050.1
TEA014228.1	TEA028194.1
TEA014228.1	TEA030009.1
TEA014228.1	TEA032123.1
TEA014228.1	TEA032730.1
TEA014228.1	TEA032991.1
TEA014228.1	TEA033031.1
TEA014228.1	TEA034006.1
TEA014228.1	TEA034017.1
TEA014228.1	TEA034028.1
TEA014228.1	TEA034036.1
TEA014228.1	TEA034050.1
TEA014492.1	TEA015248.1
TEA014492.1	TEA016463.1
TEA014492.1	TEA016601.1
TEA014492.1	TEA016716.1
TEA014492.1	TEA016718.1
TEA014492.1	TEA017768.1
TEA014492.1	TEA021535.1
TEA014492.1	TEA022348.1
TEA014492.1	TEA023432.1
TEA014492.1	TEA023444.1
TEA014492.1	TEA023451.1
TEA014492.1	TEA024175.1
TEA014492.1	TEA026458.1
TEA014492.1	TEA027599.1
TEA014492.1	TEA028050.1
TEA014492.1	TEA028194.1
TEA014492.1	TEA030009.1
TEA014492.1	TEA032730.1
TEA014492.1	TEA034036.1
TEA014596.1	TEA023451.1
TEA014596.1	TEA030009.1
TEA014699.1	TEA015861.1
TEA014699.1	TEA018911.1
TEA014699.1	TEA023795.1
TEA014699.1	TEA024696.1
TEA014699.1	TEA026508.1
TEA014699.1	TEA027740.1
TEA014699.1	TEA028352.1
TEA014699.1	TEA031238.1
TEA014705.1	TEA024991.1
TEA015248.1	TEA015861.1
TEA015248.1	TEA016725.1
TEA015248.1	TEA018911.1
TEA015248.1	TEA021257.1
TEA015248.1	TEA023390.1
TEA015248.1	TEA023795.1
TEA015248.1	TEA024795.1
TEA015248.1	TEA028449.1
TEA015248.1	TEA029643.1
TEA015248.1	TEA031027.1
TEA015248.1	TEA031434.1
TEA015248.1	TEA031554.1
TEA015248.1	TEA032547.1
TEA015248.1	TEA033198.1
TEA015248.1	TEA033522.1
TEA015536.1	TEA016725.1
TEA015536.1	TEA024504.1
TEA015536.1	TEA024991.1
TEA015536.1	TEA031434.1
TEA015791.1	TEA015861.1
TEA015791.1	TEA016725.1
TEA015791.1	TEA017759.1
TEA015791.1	TEA018911.1
TEA015791.1	TEA022654.1
TEA015791.1	TEA023795.1
TEA015791.1	TEA024795.1
TEA015791.1	TEA026508.1
TEA015791.1	TEA027740.1
TEA015791.1	TEA028449.1
TEA015791.1	TEA031027.1
TEA015791.1	TEA032547.1
TEA015791.1	TEA033522.1
TEA015861.1	TEA016463.1
TEA015861.1	TEA016469.1
TEA015861.1	TEA016601.1
TEA015861.1	TEA017731.1
TEA015861.1	TEA017768.1
TEA015861.1	TEA017916.1
TEA015861.1	TEA021535.1
TEA015861.1	TEA022348.1
TEA015861.1	TEA022940.1
TEA015861.1	TEA023432.1
TEA015861.1	TEA023444.1
TEA015861.1	TEA023451.1
TEA015861.1	TEA024175.1
TEA015861.1	TEA027599.1
TEA015861.1	TEA028050.1
TEA015861.1	TEA028194.1
TEA015861.1	TEA030009.1
TEA015861.1	TEA032123.1
TEA015861.1	TEA032730.1
TEA015861.1	TEA032991.1
TEA015861.1	TEA033031.1
TEA015861.1	TEA034006.1
TEA015861.1	TEA034017.1
TEA015861.1	TEA034028.1
TEA015861.1	TEA034036.1
TEA015861.1	TEA034050.1
TEA015967.1	TEA028194.1
TEA015967.1	TEA030009.1
TEA016012.1	TEA016463.1
TEA016012.1	TEA016716.1
TEA016012.1	TEA023432.1
TEA016012.1	TEA023451.1
TEA016012.1	TEA026458.1
TEA016012.1	TEA028194.1
TEA016012.1	TEA030009.1
TEA016012.1	TEA031627.1
TEA016229.1	TEA016463.1
TEA016229.1	TEA016704.1
TEA016229.1	TEA016716.1
TEA016229.1	TEA023432.1
TEA016229.1	TEA023444.1
TEA016229.1	TEA023451.1
TEA016229.1	TEA026458.1
TEA016229.1	TEA028194.1
TEA016229.1	TEA030009.1
TEA016229.1	TEA031627.1
TEA016229.1	TEA034032.1
TEA016229.1	TEA034036.1
TEA016463.1	TEA016725.1
TEA016463.1	TEA017479.1
TEA016463.1	TEA017759.1
TEA016463.1	TEA018911.1
TEA016463.1	TEA022654.1
TEA016463.1	TEA023390.1
TEA016463.1	TEA023550.1
TEA016463.1	TEA023795.1
TEA016463.1	TEA024795.1
TEA016463.1	TEA026508.1
TEA016463.1	TEA027740.1
TEA016463.1	TEA028449.1
TEA016463.1	TEA031027.1
TEA016463.1	TEA031238.1
TEA016463.1	TEA031434.1
TEA016463.1	TEA031479.1
TEA016463.1	TEA032547.1
TEA016463.1	TEA033198.1
TEA016463.1	TEA033522.1
TEA016469.1	TEA016725.1
TEA016469.1	TEA018911.1
TEA016469.1	TEA022654.1
TEA016469.1	TEA023795.1
TEA016469.1	TEA024795.1
TEA016469.1	TEA028449.1
TEA016469.1	TEA032547.1
TEA016601.1	TEA016725.1
TEA016601.1	TEA018911.1
TEA016601.1	TEA023795.1
TEA016601.1	TEA024795.1
TEA016601.1	TEA028449.1
TEA016601.1	TEA031027.1
TEA016601.1	TEA031434.1
TEA016601.1	TEA032547.1
TEA016601.1	TEA033522.1
TEA016704.1	TEA016725.1
TEA016704.1	TEA024504.1
TEA016704.1	TEA028449.1
TEA016704.1	TEA031434.1
TEA016716.1	TEA016725.1
TEA016716.1	TEA024504.1
TEA016716.1	TEA024795.1
TEA016716.1	TEA028449.1
TEA016716.1	TEA031434.1
TEA016718.1	TEA016725.1
TEA016718.1	TEA024504.1
TEA016718.1	TEA024795.1
TEA016718.1	TEA028449.1
TEA016718.1	TEA031434.1
TEA016725.1	TEA017768.1
TEA016725.1	TEA021535.1
TEA016725.1	TEA022348.1
TEA016725.1	TEA023432.1
TEA016725.1	TEA023444.1
TEA016725.1	TEA023451.1
TEA016725.1	TEA024175.1
TEA016725.1	TEA025393.1
TEA016725.1	TEA026458.1
TEA016725.1	TEA027599.1
TEA016725.1	TEA027829.1
TEA016725.1	TEA028050.1
TEA016725.1	TEA028111.1
TEA016725.1	TEA028194.1
TEA016725.1	TEA030009.1
TEA016725.1	TEA030023.1
TEA016725.1	TEA031627.1
TEA016725.1	TEA032217.1
TEA016725.1	TEA032730.1
TEA016725.1	TEA034016.1
TEA016725.1	TEA034032.1
TEA016725.1	TEA034036.1
TEA016788.1	TEA023451.1
TEA016788.1	TEA026458.1
TEA016788.1	TEA028194.1
TEA016788.1	TEA030009.1
TEA016788.1	TEA032217.1
TEA017479.1	TEA017768.1
TEA017479.1	TEA021535.1
TEA017479.1	TEA022348.1
TEA017479.1	TEA023432.1
TEA017479.1	TEA023444.1
TEA017479.1	TEA023451.1
TEA017479.1	TEA024175.1
TEA017479.1	TEA026458.1
TEA017479.1	TEA027599.1
TEA017479.1	TEA028050.1
TEA017479.1	TEA028194.1
TEA017479.1	TEA030009.1
TEA017479.1	TEA032730.1
TEA017479.1	TEA034036.1
TEA017731.1	TEA017759.1
TEA017731.1	TEA018911.1
TEA017731.1	TEA022654.1
TEA017731.1	TEA023795.1
TEA017731.1	TEA024696.1
TEA017731.1	TEA024795.1
TEA017731.1	TEA025632.1
TEA017731.1	TEA026508.1
TEA017731.1	TEA027740.1
TEA017731.1	TEA028352.1
TEA017731.1	TEA030739.1
TEA017731.1	TEA030790.1
TEA017731.1	TEA031238.1
TEA017731.1	TEA032547.1
TEA017759.1	TEA017768.1
TEA017759.1	TEA017916.1
TEA017759.1	TEA021535.1
TEA017759.1	TEA022348.1
TEA017759.1	TEA022940.1
TEA017759.1	TEA023432.1
TEA017759.1	TEA023444.1
TEA017759.1	TEA023451.1
TEA017759.1	TEA024175.1
TEA017759.1	TEA028050.1
TEA017759.1	TEA028194.1
TEA017759.1	TEA032123.1
TEA017759.1	TEA032730.1
TEA017759.1	TEA032991.1
TEA017759.1	TEA033031.1
TEA017759.1	TEA034006.1
TEA017759.1	TEA034017.1
TEA017759.1	TEA034028.1
TEA017759.1	TEA034036.1
TEA017759.1	TEA034050.1
TEA017768.1	TEA018911.1
TEA017768.1	TEA021257.1
TEA017768.1	TEA022654.1
TEA017768.1	TEA023390.1
TEA017768.1	TEA023526.1
TEA017768.1	TEA023550.1
TEA017768.1	TEA023795.1
TEA017768.1	TEA024696.1
TEA017768.1	TEA024795.1
TEA017768.1	TEA026508.1
TEA017768.1	TEA027740.1
TEA017768.1	TEA028352.1
TEA017768.1	TEA028449.1
TEA017768.1	TEA029643.1
TEA017768.1	TEA030790.1
TEA017768.1	TEA031027.1
TEA017768.1	TEA031238.1
TEA017768.1	TEA031434.1
TEA017768.1	TEA031479.1
TEA017768.1	TEA031554.1
TEA017768.1	TEA032547.1
TEA017768.1	TEA033198.1
TEA017768.1	TEA033522.1
TEA017916.1	TEA018911.1
TEA017916.1	TEA022654.1
TEA017916.1	TEA023390.1
TEA017916.1	TEA023795.1
TEA017916.1	TEA024696.1
TEA017916.1	TEA024795.1
TEA017916.1	TEA025632.1
TEA017916.1	TEA026508.1
TEA017916.1	TEA027740.1
TEA017916.1	TEA028352.1
TEA017916.1	TEA028449.1
TEA017916.1	TEA030739.1
TEA017916.1	TEA030790.1
TEA017916.1	TEA031027.1
TEA017916.1	TEA031238.1
TEA017916.1	TEA032547.1
TEA017916.1	TEA033522.1
TEA018911.1	TEA021535.1
TEA018911.1	TEA022348.1
TEA018911.1	TEA022940.1
TEA018911.1	TEA023432.1
TEA018911.1	TEA023444.1
TEA018911.1	TEA023451.1
TEA018911.1	TEA024175.1
TEA018911.1	TEA027599.1
TEA018911.1	TEA028050.1
TEA018911.1	TEA028194.1
TEA018911.1	TEA032123.1
TEA018911.1	TEA032730.1
TEA018911.1	TEA032991.1
TEA018911.1	TEA033031.1
TEA018911.1	TEA034006.1
TEA018911.1	TEA034017.1
TEA018911.1	TEA034028.1
TEA018911.1	TEA034036.1
TEA018911.1	TEA034050.1
TEA019245.1	TEA026458.1
TEA019245.1	TEA032217.1
TEA021257.1	TEA021535.1
TEA021257.1	TEA022348.1
TEA021257.1	TEA023432.1
TEA021257.1	TEA023444.1
TEA021257.1	TEA023451.1
TEA021257.1	TEA024175.1
TEA021257.1	TEA028194.1
TEA021257.1	TEA030009.1
TEA021257.1	TEA034036.1
TEA021535.1	TEA022654.1
TEA021535.1	TEA023390.1
TEA021535.1	TEA023526.1
TEA021535.1	TEA023550.1
TEA021535.1	TEA023795.1
TEA021535.1	TEA024696.1
TEA021535.1	TEA024795.1
TEA021535.1	TEA026508.1
TEA021535.1	TEA027740.1
TEA021535.1	TEA028352.1
TEA021535.1	TEA028449.1
TEA021535.1	TEA029643.1
TEA021535.1	TEA030790.1
TEA021535.1	TEA031027.1
TEA021535.1	TEA031238.1
TEA021535.1	TEA031434.1
TEA021535.1	TEA031479.1
TEA021535.1	TEA031554.1
TEA021535.1	TEA032547.1
TEA021535.1	TEA033198.1
TEA021535.1	TEA033522.1
TEA022348.1	TEA022654.1
TEA022348.1	TEA023390.1
TEA022348.1	TEA023526.1
TEA022348.1	TEA023795.1
TEA022348.1	TEA024795.1
TEA022348.1	TEA026508.1
TEA022348.1	TEA027740.1
TEA022348.1	TEA028352.1
TEA022348.1	TEA028449.1
TEA022348.1	TEA029643.1
TEA022348.1	TEA030790.1
TEA022348.1	TEA031027.1
TEA022348.1	TEA031238.1
TEA022348.1	TEA031434.1
TEA022348.1	TEA031479.1
TEA022348.1	TEA031554.1
TEA022348.1	TEA032547.1
TEA022348.1	TEA033198.1
TEA022348.1	TEA033522.1
TEA022654.1	TEA022940.1
TEA022654.1	TEA023432.1
TEA022654.1	TEA023444.1
TEA022654.1	TEA023451.1
TEA022654.1	TEA024175.1
TEA022654.1	TEA028050.1
TEA022654.1	TEA028194.1
TEA022654.1	TEA032123.1
TEA022654.1	TEA032730.1
TEA022654.1	TEA032991.1
TEA022654.1	TEA034006.1
TEA022654.1	TEA034017.1
TEA022654.1	TEA034028.1
TEA022654.1	TEA034036.1
TEA022654.1	TEA034050.1
TEA022940.1	TEA023795.1
TEA022940.1	TEA024696.1
TEA022940.1	TEA024795.1
TEA022940.1	TEA026508.1
TEA022940.1	TEA027740.1
TEA022940.1	TEA028352.1
TEA022940.1	TEA030790.1
TEA022940.1	TEA031238.1
TEA022940.1	TEA032547.1
TEA023390.1	TEA023432.1
TEA023390.1	TEA023444.1
TEA023390.1	TEA023451.1
TEA023390.1	TEA024175.1
TEA023390.1	TEA028050.1
TEA023390.1	TEA032730.1
TEA023390.1	TEA032991.1
TEA023390.1	TEA034036.1
TEA023432.1	TEA023526.1
TEA023432.1	TEA023550.1
TEA023432.1	TEA023795.1
TEA023432.1	TEA024696.1
TEA023432.1	TEA024795.1
TEA023432.1	TEA026508.1
TEA023432.1	TEA027740.1
TEA023432.1	TEA028352.1
TEA023432.1	TEA028449.1
TEA023432.1	TEA029643.1
TEA023432.1	TEA030790.1
TEA023432.1	TEA031027.1
TEA023432.1	TEA031238.1
TEA023432.1	TEA031434.1
TEA023432.1	TEA031479.1
TEA023432.1	TEA031554.1
TEA023432.1	TEA032547.1
TEA023432.1	TEA033198.1
TEA023432.1	TEA033522.1
TEA023444.1	TEA023526.1
TEA023444.1	TEA023550.1
TEA023444.1	TEA023795.1
TEA023444.1	TEA024696.1
TEA023444.1	TEA024795.1
TEA023444.1	TEA026508.1
TEA023444.1	TEA027740.1
TEA023444.1	TEA028352.1
TEA023444.1	TEA028449.1
TEA023444.1	TEA029643.1
TEA023444.1	TEA030790.1
TEA023444.1	TEA031027.1
TEA023444.1	TEA031238.1
TEA023444.1	TEA031434.1
TEA023444.1	TEA031479.1
TEA023444.1	TEA031554.1
TEA023444.1	TEA032547.1
TEA023444.1	TEA033198.1
TEA023444.1	TEA033522.1
TEA023451.1	TEA023526.1
TEA023451.1	TEA023550.1
TEA023451.1	TEA023795.1
TEA023451.1	TEA024504.1
TEA023451.1	TEA024795.1
TEA023451.1	TEA026508.1
TEA023451.1	TEA027740.1
TEA023451.1	TEA028352.1
TEA023451.1	TEA028449.1
TEA023451.1	TEA029437.1
TEA023451.1	TEA029643.1
TEA023451.1	TEA030790.1
TEA023451.1	TEA031027.1
TEA023451.1	TEA031238.1
TEA023451.1	TEA031434.1
TEA023451.1	TEA031479.1
TEA023451.1	TEA031554.1
TEA023451.1	TEA031818.1
TEA023451.1	TEA032547.1
TEA023451.1	TEA033198.1
TEA023451.1	TEA033522.1
TEA023526.1	TEA024175.1
TEA023526.1	TEA028194.1
TEA023526.1	TEA030009.1
TEA023526.1	TEA034036.1
TEA023550.1	TEA024175.1
TEA023550.1	TEA028050.1
TEA023550.1	TEA032123.1
TEA023550.1	TEA032730.1
TEA023550.1	TEA032991.1
TEA023550.1	TEA034017.1
TEA023550.1	TEA034036.1
TEA023795.1	TEA024175.1
TEA023795.1	TEA028050.1
TEA023795.1	TEA028194.1
TEA023795.1	TEA032123.1
TEA023795.1	TEA032730.1
TEA023795.1	TEA032991.1
TEA023795.1	TEA033031.1
TEA023795.1	TEA034006.1
TEA023795.1	TEA034017.1
TEA023795.1	TEA034028.1
TEA023795.1	TEA034036.1
TEA023795.1	TEA034050.1
TEA024175.1	TEA024696.1
TEA024175.1	TEA024795.1
TEA024175.1	TEA026508.1
TEA024175.1	TEA027740.1
TEA024175.1	TEA028352.1
TEA024175.1	TEA028449.1
TEA024175.1	TEA029643.1
TEA024175.1	TEA030790.1
TEA024175.1	TEA031027.1
TEA024175.1	TEA031238.1
TEA024175.1	TEA031434.1
TEA024175.1	TEA031479.1
TEA024175.1	TEA031554.1
TEA024175.1	TEA032547.1
TEA024175.1	TEA033198.1
TEA024175.1	TEA033522.1
TEA024504.1	TEA025393.1
TEA024504.1	TEA026458.1
TEA024504.1	TEA028111.1
TEA024504.1	TEA028194.1
TEA024504.1	TEA030009.1
TEA024504.1	TEA030023.1
TEA024504.1	TEA031627.1
TEA024504.1	TEA032217.1
TEA024504.1	TEA034016.1
TEA024504.1	TEA034032.1
TEA024696.1	TEA028050.1
TEA024696.1	TEA032123.1
TEA024696.1	TEA032991.1
TEA024696.1	TEA033031.1
TEA024696.1	TEA034017.1
TEA024696.1	TEA034028.1
TEA024696.1	TEA034036.1
TEA024696.1	TEA034050.1
TEA024795.1	TEA027599.1
TEA024795.1	TEA027829.1
TEA024795.1	TEA028050.1
TEA024795.1	TEA028194.1
TEA024795.1	TEA030009.1
TEA024795.1	TEA032123.1
TEA024795.1	TEA032730.1
TEA024795.1	TEA032991.1
TEA024795.1	TEA034006.1
TEA024795.1	TEA034017.1
TEA024795.1	TEA034028.1
TEA024795.1	TEA034036.1
TEA024795.1	TEA034050.1
TEA024991.1	TEA025393.1
TEA024991.1	TEA026458.1
TEA024991.1	TEA028111.1
TEA024991.1	TEA028194.1
TEA024991.1	TEA030009.1
TEA024991.1	TEA030023.1
TEA024991.1	TEA032217.1
TEA024991.1	TEA034016.1
TEA024991.1	TEA034032.1
TEA025393.1	TEA031434.1
TEA025970.1	TEA026458.1
TEA025970.1	TEA028194.1
TEA025970.1	TEA030009.1
TEA025970.1	TEA031627.1
TEA025970.1	TEA032217.1
TEA025970.1	TEA034016.1
TEA026458.1	TEA028449.1
TEA026458.1	TEA029437.1
TEA026458.1	TEA031434.1
TEA026458.1	TEA031554.1
TEA026458.1	TEA031818.1
TEA026458.1	TEA033198.1
TEA026508.1	TEA028050.1
TEA026508.1	TEA032123.1
TEA026508.1	TEA032730.1
TEA026508.1	TEA032991.1
TEA026508.1	TEA033031.1
TEA026508.1	TEA034006.1
TEA026508.1	TEA034017.1
TEA026508.1	TEA034028.1
TEA026508.1	TEA034036.1
TEA026508.1	TEA034050.1
TEA027599.1	TEA028449.1
TEA027599.1	TEA031027.1
TEA027599.1	TEA031434.1
TEA027599.1	TEA032547.1
TEA027599.1	TEA033522.1
TEA027740.1	TEA028050.1
TEA027740.1	TEA032123.1
TEA027740.1	TEA032730.1
TEA027740.1	TEA032991.1
TEA027740.1	TEA033031.1
TEA027740.1	TEA034006.1
TEA027740.1	TEA034017.1
TEA027740.1	TEA034028.1
TEA027740.1	TEA034036.1
TEA027740.1	TEA034050.1
TEA027829.1	TEA028449.1
TEA027829.1	TEA031434.1
TEA028050.1	TEA028352.1
TEA028050.1	TEA028449.1
TEA028050.1	TEA029643.1
TEA028050.1	TEA030790.1
TEA028050.1	TEA031027.1
TEA028050.1	TEA031238.1
TEA028050.1	TEA031479.1
TEA028050.1	TEA032547.1
TEA028050.1	TEA033522.1
TEA028111.1	TEA031434.1
TEA028194.1	TEA028449.1
TEA028194.1	TEA029437.1
TEA028194.1	TEA029643.1
TEA028194.1	TEA031027.1
TEA028194.1	TEA031434.1
TEA028194.1	TEA031479.1
TEA028194.1	TEA031554.1
TEA028194.1	TEA031818.1
TEA028194.1	TEA032547.1
TEA028194.1	TEA033198.1
TEA028194.1	TEA033522.1
TEA028352.1	TEA032123.1
TEA028352.1	TEA032730.1
TEA028352.1	TEA032991.1
TEA028352.1	TEA033031.1
TEA028352.1	TEA034006.1
TEA028352.1	TEA034017.1
TEA028352.1	TEA034028.1
TEA028352.1	TEA034036.1
TEA028352.1	TEA034050.1
TEA028449.1	TEA030009.1
TEA028449.1	TEA031627.1
TEA028449.1	TEA032123.1
TEA028449.1	TEA032730.1
TEA028449.1	TEA032991.1
TEA028449.1	TEA034006.1
TEA028449.1	TEA034017.1
TEA028449.1	TEA034028.1
TEA028449.1	TEA034032.1
TEA028449.1	TEA034036.1
TEA029437.1	TEA030009.1
TEA029437.1	TEA032217.1
TEA029643.1	TEA030009.1
TEA029643.1	TEA032730.1
TEA029643.1	TEA034036.1
TEA030009.1	TEA031027.1
TEA030009.1	TEA031434.1
TEA030009.1	TEA031479.1
TEA030009.1	TEA031554.1
TEA030009.1	TEA031818.1
TEA030009.1	TEA033198.1
TEA030009.1	TEA033522.1
TEA030023.1	TEA031434.1
TEA030739.1	TEA034017.1
TEA030739.1	TEA034028.1
TEA030790.1	TEA032123.1
[truncated: 44 more rows]

## Sheet: Table S8
Table S8. Nodes in the coexpression network of related phytohormones
miRNA	class	new id
ghr-MIR7499-p3_2ss10GC17CG_1	miRNA	miR7499a
ghr-MIR7499-p3_2ss10GC17CG_2	miRNA	miR7499b
gma-miR167e	miRNA	miR167c
gma-miR167k_R-3_1ss9CT	miRNA	miR167d
gma-miR171m_1ss21AT	miRNA	miR171d
gra-MIR8757b-p5_1ss17GC	miRNA	miR8757
mdm-miR319b-5p_L+1	miRNA	miR319b
mtr-miR159a	miRNA	miR159a
mtr-miR164a	miRNA	miR164a
mtr-miR164a_1ss21AG	miRNA	miR164b
mtr-miR166a_1ss21CT	miRNA	miR166a
mtr-miR166a_L+1R-1	miRNA	miR166b
mtr-miR167a_L-1R+1	miRNA	miR167a
mtr-miR171c_2ss13GT21TC	miRNA	miR171a
mtr-miR171d_R+1	miRNA	miR171b
mtr-miR172c-5p	miRNA	miR172a
mtr-miR2111a-5p_1ss21AG	miRNA	miR2111a
mtr-miR2111a-5p_R-1	miRNA	miR2111b
mtr-MIR2603-p3_2ss9AC17AC	miRNA	miR2603
mtr-miR319a-5p_2ss13AT21CT	miRNA	miR319a
mtr-miR393a_R+1	miRNA	miR393
mtr-miR396a-5p	miRNA	miR396b
mtr-miR396a-5p_L-1R+1	miRNA	miR396c
mtr-miR396b-5p	miRNA	miR396d
mtr-miR398b	miRNA	miR398
nta-MIR172e-p3_2ss15CG19TA	miRNA	miR172b
nta-MIR6149a-p5_2ss18CT21TA	miRNA	miR6149
PC-3p-15743_350	miRNA	PC-3p-15743_350
PC-3p-24596_231	miRNA	PC-3p-24596_231
PC-3p-2771_1538	miRNA	PC-3p-2771_1538
PC-3p-42917_129	miRNA	PC-3p-42917_129
PC-3p-43439_127	miRNA	PC-3p-43439_127
PC-3p-4376_1064	miRNA	PC-3p-4376_1064
PC-3p-71291_66	miRNA	PC-3p-71291_66
PC-3p-78787_57	miRNA	PC-3p-78787_57
ptc-miR156a_R+1	miRNA	miR156
ptc-miR403a	miRNA	miR403a
stu-miR171d-3p_R-1_1ss19AG	miRNA	miR171c
stu-MIR8005c-p3_1ss11AG	miRNA	miR8005
tcc-MIR403a-p5_1ss20TC	miRNA	miR403b
vvi-miR396a_1ss20TC	miRNA	miR396a
TEA000705.1	TF	HB-HD-ZIP1
TEA000848.1	TF	GRF1
TEA000953.1	TF	GRF2
TEA001647.1	target	MCM5
TEA001714.1	target	ABCC2
TEA001894.1	TF	GRF3
TEA002585.1	target	CCO
TEA003128.1	target	RP-S5
TEA004547.1	target	TMK
TEA005520.1	target	C1QBP
TEA005648.1	target	EXOC
TEA007295.1	target	IRAK4
TEA010299.1	target	PCNA
TEA010738.1	target	CRB
TEA011367.1	target	LHY
TEA011860.1	target	SND1
TEA012588.1	target	adk
TEA013303.1	target	WNK
TEA014228.1	TF	GRF4
TEA015241.1	target	ELF2C
TEA015861.1	TF	GRF5
TEA016295.1	target	GN1_2_3
TEA016725.1	target	yidC
TEA017759.1	target	unk
TEA018911.1	TF	GRF6
TEA022654.1	TF	GRF7
TEA024504.1	target	ABCF2
TEA024696.1	TF	GRF8
TEA024795.1	TF	C2C2-GATA
TEA024991.1	target	LAC
TEA026508.1	TF	GRF9
TEA027212.1	target	ATP2C
TEA027740.1	TF	GRF10
TEA028352.1	TF	GRF11
TEA028449.1	target	GINS4
TEA030790.1	TF	GRF12
TEA031238.1	target	GOLGB1
TEA031434.1	target	petC
TEA032547.1	target	RP-L35e
TEA033198.1	TF	bHLH
TEA033522.1	TF	GRF13
TEA018479.1	hormone_signal	IAA1
TEA014495.1	hormone_signal	BSK
TEA014506.1	hormone_signal	IAA2
TEA014518.1	hormone_signal	ARF4
TEA004492.1	hormone_signal	SBP2
TEA022777.1	hormone_signal	GRAS9
TEA030078.1	hormone_signal	SAUR1
TEA012865.1	hormone_signal	AHK1
TEA011239.1	hormone_signal	GH3_1
TEA025845.1	hormone_signal	CYCD3_1
TEA008888.1	hormone_signal	SBP4
TEA032182.1	hormone_signal	bHLH6
TEA029714.1	hormone_signal	GRAS12
TEA033527.1	hormone_signal	SAUR2
TEA004537.1	hormone_signal	CYCD3_2
TEA010729.1	hormone_signal	TGA
TEA000038.1	hormone_signal	ARF5
TEA032878.1	hormone_signal	EIN3
TEA030618.1	hormone_signal	SBP8
TEA029307.1	hormone_signal	GID1_1
TEA007628.1	hormone_signal	NPR1
TEA008197.1	hormone_signal	CYCD3_3
TEA000833.1	hormone_signal	bHLH1
TEA029197.1	hormone_signal	GH3_2
TEA029437.1	hormone_signal	GRAS2
TEA021676.1	hormone_signal	GRAS8
TEA026093.1	hormone_signal	IAA3
TEA005327.1	hormone_signal	SAUR3
TEA003134.1	hormone_signal	GRAS3
TEA026953.1	hormone_signal	GID1_2
TEA008716.1	hormone_signal	SBP7
TEA030862.1	hormone_signal	GID1_3
TEA020221.1	hormone_signal	B3-ARF1
TEA002184.1	hormone_signal	GID1_4
TEA020933.1	hormone_signal	GRAS7
TEA007106.1	hormone_signal	ARR-A1
TEA031171.1	hormone_signal	TCH1
TEA018439.1	hormone_signal	GARP-ARR-B
TEA028907.1	hormone_signal	AUX1
TEA003578.1	hormone_signal	AHK2
TEA003587.1	hormone_signal	AHK3
TEA016380.1	hormone_signal	bHLH2
TEA014197.1	hormone_signal	CYCD3_4
TEA019380.1	hormone_signal	bHLH3
TEA012385.1	hormone_signal	ARR-A2
TEA030346.1	hormone_signal	B3-ARF3
TEA030349.1	hormone_signal	ARF6
TEA004087.1	hormone_signal	GRAS4
TEA028388.1	hormone_signal	GRAS11
TEA006416.1	hormone_signal	ARF7
TEA006724.1	hormone_signal	IAA4
TEA031408.1	hormone_signal	NOZZLE
TEA025203.1	hormone_signal	GH3_3
TEA028789.1	hormone_signal	EBF1_1
TEA029643.1	hormone_signal	B3-ARF
TEA029670.1	hormone_signal	AUX2
TEA000659.1	hormone_signal	TIR1
TEA024333.1	hormone_signal	GRAS10
TEA005359.1	hormone_signal	GRAS5
TEA017882.1	hormone_signal	GH3_4
TEA000236.1	hormone_signal	GH3_5
TEA004474.1	hormone_signal	Tify1
TEA012314.1	hormone_signal	TCH2
TEA023997.1	hormone_signal	bHLH4
TEA004320.1	hormone_signal	EBF1_2
TEA032070.1	hormone_signal	GID1_6
TEA028959.1	hormone_signal	GID1_5
TEA006584.1	hormone_signal	SBP3
TEA006588.1	hormone_signal	AHK4
TEA014041.1	hormone_signal	bZIP
TEA028234.1	hormone_signal	PR1
TEA011836.1	hormone_signal	SAUR4
TEA023795.1	hormone_signal	SBP6
TEA022191.1	hormone_signal	BES1
TEA030826.1	hormone_signal	Tify3
TEA013558.1	hormone_signal	GRAS1
TEA019245.1	hormone_signal	SBP5
TEA025875.1	hormone_signal	bHLH5
TEA001755.1	hormone_signal	SBP1
TEA010027.1	hormone_signal	GRAS6
TEA006688.1	hormone_signal	IAA5
TEA027331.1	hormone_signal	B3-ARF2
TEA030246.1	hormone_signal	BRI1
TEA013731.1	hormone_signal	GH3_6
TEA015144.1	hormone_signal	GARP-G2-like
TEA030190.1	hormone_signal	Tify2
TEA009739.1	hormone_syn	CISZOG
TEA022776.1	hormone_syn	AOC1
TEA005837.1	hormone_syn	MDH2
TEA029285.1	hormone_syn	CYP97A3_1
TEA006264.1	hormone_syn	AHCY
TEA001069.1	hormone_syn	TAA1
TEA014723.1	hormone_syn	CYP707A
TEA028075.1	hormone_syn	DNMT1
TEA014139.1	hormone_syn	CKX1
TEA019577.1	hormone_syn	ABA2
TEA030992.1	hormone_syn	CKX2
TEA002515.1	hormone_syn	TAA2
TEA029314.1	hormone_syn	ADH1
TEA016574.1	hormone_syn	ALDH1
TEA013184.1	hormone_syn	GA2ox1
TEA010854.1	hormone_syn	cysE
TEA002709.1	hormone_syn	DNMT2
TEA011325.1	hormone_syn	TAA3
TEA018760.1	hormone_syn	AMD1
TEA020219.1	hormone_syn	UGT74B1_1
TEA029098.1	hormone_syn	speE
TEA009781.1	hormone_syn	DNMT3
TEA019960.1	hormone_syn	DAD1_1
TEA001292.1	hormone_syn	JMT1
TEA016785.1	hormone_syn	CKX3
TEA002767.1	hormone_syn	lysC
TEA015970.1	hormone_syn	miaA
TEA027314.1	hormone_syn	ACS1
TEA027319.1	hormone_syn	ACS2
TEA026130.1	hormone_syn	DNMT4
TEA011206.1	hormone_syn	ALDH2
TEA013124.1	hormone_syn	mmuM
TEA011501.1	hormone_syn	cysK
TEA015732.1	hormone_syn	Z-ISO
TEA022237.1	hormone_syn	NCED1
TEA019639.1	hormone_syn	asd
TEA027984.1	hormone_syn	AOS
TEA015791.1	hormone_syn	JMT2
TEA025215.1	hormone_syn	ALDH3
TEA008855.1	hormone_syn	crtISO1
TEA011960.1	hormone_syn	DNMT5
TEA027136.1	hormone_syn	CYP97A3_2
TEA025155.1	hormone_syn	NCED2
TEA030314.1	hormone_syn	LDH
TEA019366.1	hormone_syn	DWARF27
TEA020169.1	hormone_syn	YUCCA1
TEA017995.1	hormone_syn	CKX4
TEA013031.1	hormone_syn	YUCCA2
TEA006701.1	hormone_syn	UGT74B1_2
TEA006735.1	hormone_syn	metK
TEA017925.1	hormone_syn	GA2ox2
TEA009431.1	hormone_syn	4CL
TEA005774.1	hormone_syn	DNMT6
TEA005784.1	hormone_syn	DNMT7
TEA028050.1	hormone_syn	JMT3
TEA020759.1	hormone_syn	MDH1
TEA015009.1	hormone_syn	TAA4
TEA016017.1	hormone_syn	PDS
TEA026170.1	hormone_syn	CYP85A2
TEA000909.1	hormone_syn	TAT1
TEA015253.1	hormone_syn	AOC2
TEA017333.1	hormone_syn	thrA
TEA025596.1	hormone_syn	CKX5
TEA017244.1	hormone_syn	CYP90D1
TEA013324.1	hormone_syn	GA2ox3
TEA003114.1	hormone_syn	TAT2
TEA003117.1	hormone_syn	TAT3
TEA031627.1	hormone_syn	OPCL1
TEA029393.1	hormone_syn	AOC3
TEA013909.1	hormone_syn	ZEP
TEA031004.1	hormone_syn	DAD1_2
TEA021525.1	hormone_syn	DAD1_3
TEA019044.1	hormone_syn	DNMT8
TEA021049.1	hormone_syn	ACO
TEA000496.1	hormone_syn	CPS
TEA027487.1	hormone_syn	MGL
TEA017713.1	hormone_syn	crtISO2
TEA017723.1	hormone_syn	crtISO3
TEA024873.1	hormone_syn	DEP1
TEA020334.1	hormone_syn	crtISO4
TEA027513.1	hormone_syn	GA20ox
TEA007854.1	hormone_syn	ZDS

## Sheet: Table S9
Table S9. Edges in the coexpression network of related phtohormones
from node	to node
mtr-miR393a_R+1	TEA000659.1
gma-miR167k_R-3_1ss9CT	TEA029643.1
ptc-miR156a_R+1	TEA001755.1
ptc-miR156a_R+1	TEA004492.1
ptc-miR156a_R+1	TEA006584.1
ptc-miR156a_R+1	TEA008888.1
ptc-miR156a_R+1	TEA019245.1
ptc-miR156a_R+1	TEA023795.1
ptc-miR156a_R+1	TEA030618.1
mtr-miR171d_R+1	TEA013558.1
mtr-miR171d_R+1	TEA029437.1
mtr-miR171c_2ss13GT21TC	TEA013558.1
mtr-miR171c_2ss13GT21TC	TEA029437.1
PC-3p-78787_57	TEA029307.1
PC-3p-71291_66	TEA014197.1
vvi-miR396a_1ss20TC	TEA028959.1
gma-miR171m_1ss21AT	TEA013558.1
gma-miR171m_1ss21AT	TEA029437.1
stu-miR171d-3p_R-1_1ss19AG	TEA004087.1
stu-miR171d-3p_R-1_1ss19AG	TEA013558.1
stu-miR171d-3p_R-1_1ss19AG	TEA029437.1
mtr-miR159a	TEA031408.1
mtr-miR164a	TEA011325.1
mtr-miR164a_1ss21AG	TEA011325.1
PC-3p-43439_127	TEA031238.1
mtr-miR319a-5p_2ss13AT21CT	TEA011367.1
mdm-miR319b-5p_L+1	TEA010299.1
stu-MIR8005c-p3_1ss11AG	TEA003128.1
stu-MIR8005c-p3_1ss11AG	TEA005520.1
nta-MIR6149a-p5_2ss18CT21TA	TEA032547.1
nta-MIR172e-p3_2ss15CG19TA	TEA016725.1
PC-3p-42917_129	TEA017759.1
PC-3p-15743_350	TEA024504.1
PC-3p-15743_350	TEA031434.1
mtr-miR167a_L-1R+1	TEA012588.1
PC-3p-4376_1064	TEA007295.1
ghr-MIR7499-p3_2ss10GC17CG_2	TEA016295.1
ghr-MIR7499-p3_2ss10GC17CG_1	TEA016295.1
tcc-MIR403a-p5_1ss20TC	TEA028449.1
mtr-miR172c-5p	TEA024991.1
mtr-MIR2603-p3_2ss9AC17AC	TEA011860.1
PC-3p-2771_1538	TEA004547.1
mtr-miR2111a-5p_1ss21AG	TEA013303.1
mtr-miR2111a-5p_R-1	TEA013303.1
PC-3p-24596_231	TEA010738.1
mtr-miR393a_R+1	TEA033198.1
mtr-miR396a-5p_L-1R+1	TEA001647.1
mtr-miR166a_1ss21CT	TEA000705.1
gma-miR167e	TEA002585.1
mtr-miR171c_2ss13GT21TC	TEA001714.1
mtr-miR398b	TEA024795.1
ptc-miR403a	TEA015241.1
vvi-miR396a_1ss20TC	TEA000848.1
vvi-miR396a_1ss20TC	TEA000953.1
vvi-miR396a_1ss20TC	TEA001894.1
vvi-miR396a_1ss20TC	TEA014228.1
vvi-miR396a_1ss20TC	TEA018911.1
vvi-miR396a_1ss20TC	TEA022654.1
vvi-miR396a_1ss20TC	TEA024696.1
vvi-miR396a_1ss20TC	TEA026508.1
vvi-miR396a_1ss20TC	TEA027212.1
vvi-miR396a_1ss20TC	TEA027740.1
vvi-miR396a_1ss20TC	TEA028352.1
vvi-miR396a_1ss20TC	TEA030790.1
vvi-miR396a_1ss20TC	TEA033522.1
mtr-miR396b-5p	TEA000848.1
mtr-miR396b-5p	TEA000953.1
mtr-miR396b-5p	TEA001894.1
mtr-miR396b-5p	TEA014228.1
mtr-miR396b-5p	TEA015861.1
mtr-miR396b-5p	TEA018911.1
mtr-miR396b-5p	TEA022654.1
mtr-miR396b-5p	TEA024696.1
mtr-miR396b-5p	TEA026508.1
mtr-miR396b-5p	TEA027212.1
mtr-miR396b-5p	TEA027740.1
mtr-miR396b-5p	TEA028352.1
mtr-miR396b-5p	TEA030790.1
mtr-miR396b-5p	TEA033522.1
mtr-miR396a-5p	TEA000848.1
mtr-miR396a-5p	TEA000953.1
mtr-miR396a-5p	TEA001894.1
mtr-miR396a-5p	TEA014228.1
mtr-miR396a-5p	TEA015861.1
mtr-miR396a-5p	TEA018911.1
mtr-miR396a-5p	TEA022654.1
mtr-miR396a-5p	TEA024696.1
mtr-miR396a-5p	TEA026508.1
mtr-miR396a-5p	TEA027212.1
mtr-miR396a-5p	TEA027740.1
mtr-miR396a-5p	TEA028352.1
mtr-miR396a-5p	TEA030790.1
mtr-miR396a-5p	TEA033522.1
mtr-miR166a_L+1R-1	TEA000705.1
gra-MIR8757b-p5_1ss17GC	TEA005648.1
gra-MIR8757b-p5_1ss17GC	TEA027740.1
TEA000038.1	TEA014228.1
TEA000038.1	TEA024795.1
TEA000236.1	TEA005648.1
TEA000496.1	TEA001647.1
TEA000496.1	TEA010299.1
TEA000496.1	TEA028449.1
TEA000705.1	TEA005837.1
TEA000833.1	TEA004547.1
TEA000833.1	TEA005648.1
TEA000833.1	TEA007295.1
TEA000833.1	TEA015241.1
TEA000833.1	TEA016295.1
TEA000848.1	TEA001069.1
TEA000848.1	TEA006688.1
TEA000848.1	TEA012385.1
TEA000848.1	TEA020221.1
TEA000848.1	TEA028234.1
TEA000848.1	TEA028388.1
TEA000848.1	TEA029670.1
TEA000909.1	TEA024991.1
TEA000953.1	TEA029670.1
TEA001069.1	TEA014228.1
TEA001069.1	TEA018911.1
TEA001069.1	TEA024795.1
TEA001292.1	TEA010299.1
TEA001292.1	TEA024795.1
TEA001647.1	TEA002709.1
TEA001647.1	TEA003134.1
TEA001647.1	TEA005774.1
TEA001647.1	TEA005784.1
TEA001647.1	TEA007628.1
TEA001647.1	TEA009431.1
TEA001647.1	TEA009781.1
TEA001647.1	TEA011836.1
TEA001647.1	TEA011960.1
TEA001647.1	TEA013031.1
TEA001647.1	TEA017723.1
TEA001647.1	TEA023997.1
TEA001647.1	TEA025203.1
TEA001647.1	TEA025845.1
TEA001647.1	TEA026130.1
TEA001647.1	TEA027331.1
TEA001647.1	TEA028075.1
TEA001647.1	TEA028907.1
TEA001647.1	TEA029714.1
TEA001647.1	TEA032070.1
TEA001714.1	TEA005837.1
TEA001894.1	TEA006688.1
TEA001894.1	TEA008197.1
TEA001894.1	TEA012385.1
TEA001894.1	TEA017925.1
TEA001894.1	TEA018479.1
TEA001894.1	TEA029670.1
TEA002184.1	TEA026508.1
TEA002515.1	TEA002585.1
TEA002585.1	TEA007854.1
TEA002585.1	TEA013909.1
TEA002585.1	TEA014495.1
TEA002585.1	TEA015009.1
TEA002585.1	TEA015144.1
TEA002585.1	TEA015732.1
TEA002585.1	TEA015970.1
TEA002585.1	TEA016785.1
TEA002585.1	TEA019639.1
TEA002585.1	TEA026170.1
TEA002585.1	TEA030992.1
TEA002709.1	TEA010299.1
TEA002709.1	TEA028449.1
TEA002709.1	TEA033522.1
TEA002767.1	TEA010299.1
TEA002767.1	TEA028449.1
TEA003114.1	TEA031434.1
TEA003117.1	TEA016725.1
TEA003128.1	TEA013031.1
TEA003128.1	TEA028907.1
TEA003134.1	TEA010299.1
TEA003134.1	TEA012588.1
TEA003134.1	TEA028449.1
TEA003134.1	TEA033522.1
TEA003578.1	TEA024795.1
TEA003578.1	TEA032547.1
TEA003587.1	TEA024795.1
TEA004320.1	TEA005648.1
TEA004474.1	TEA005648.1
TEA004537.1	TEA026508.1
TEA004547.1	TEA005327.1
TEA004547.1	TEA010027.1
TEA004547.1	TEA010854.1
TEA004547.1	TEA013731.1
TEA004547.1	TEA021676.1
TEA004547.1	TEA022191.1
TEA004547.1	TEA022777.1
TEA004547.1	TEA025155.1
TEA004547.1	TEA027314.1
TEA004547.1	TEA029393.1
TEA004547.1	TEA030078.1
TEA005327.1	TEA005648.1
TEA005327.1	TEA015241.1
TEA005359.1	TEA010299.1
TEA005359.1	TEA028449.1
TEA005520.1	TEA013031.1
TEA005520.1	TEA029670.1
TEA005648.1	TEA006416.1
TEA005648.1	TEA010027.1
TEA005648.1	TEA010854.1
TEA005648.1	TEA012314.1
TEA005648.1	TEA013731.1
TEA005648.1	TEA014723.1
TEA005648.1	TEA016380.1
TEA005648.1	TEA019380.1
TEA005648.1	TEA019960.1
TEA005648.1	TEA021525.1
TEA005648.1	TEA021676.1
TEA005648.1	TEA022191.1
TEA005648.1	TEA022237.1
TEA005648.1	TEA022777.1
TEA005648.1	TEA024333.1
TEA005648.1	TEA025155.1
TEA005648.1	TEA027314.1
TEA005648.1	TEA027319.1
TEA005648.1	TEA027984.1
TEA005648.1	TEA028789.1
TEA005648.1	TEA029393.1
TEA005648.1	TEA030078.1
TEA005648.1	TEA030826.1
TEA005648.1	TEA031004.1
TEA005648.1	TEA031171.1
TEA005648.1	TEA033527.1
TEA005774.1	TEA010299.1
TEA005774.1	TEA028449.1
TEA005784.1	TEA010299.1
TEA005784.1	TEA028449.1
TEA005837.1	TEA010738.1
TEA005837.1	TEA016725.1
TEA005837.1	TEA024504.1
TEA005837.1	TEA031434.1
TEA006264.1	TEA024795.1
TEA006264.1	TEA032547.1
TEA006588.1	TEA031434.1
TEA006688.1	TEA014228.1
TEA006688.1	TEA024696.1
TEA006688.1	TEA024795.1
TEA006688.1	TEA026508.1
TEA006688.1	TEA027740.1
TEA006688.1	TEA028352.1
TEA006688.1	TEA030790.1
TEA006701.1	TEA024795.1
TEA006724.1	TEA018911.1
TEA006735.1	TEA028449.1
TEA007106.1	TEA014228.1
TEA007106.1	TEA018911.1
TEA007295.1	TEA013731.1
TEA007295.1	TEA019960.1
TEA007295.1	TEA021676.1
TEA007295.1	TEA022191.1
TEA007295.1	TEA022777.1
TEA007295.1	TEA029393.1
TEA007295.1	TEA030078.1
TEA007628.1	TEA010299.1
TEA007628.1	TEA028449.1
TEA007854.1	TEA031434.1
TEA008197.1	TEA014228.1
TEA008197.1	TEA024795.1
TEA008197.1	TEA026508.1
TEA008197.1	TEA032547.1
TEA008716.1	TEA010299.1
TEA008716.1	TEA014228.1
TEA008716.1	TEA024795.1
TEA008716.1	TEA028449.1
TEA008855.1	TEA016725.1
TEA009431.1	TEA010299.1
TEA009431.1	TEA028449.1
TEA009739.1	TEA024795.1
TEA009739.1	TEA032547.1
TEA009781.1	TEA010299.1
TEA009781.1	TEA014228.1
TEA009781.1	TEA024795.1
TEA009781.1	TEA028449.1
TEA010027.1	TEA015241.1
TEA010027.1	TEA016295.1
TEA010299.1	TEA011836.1
TEA010299.1	TEA011960.1
TEA010299.1	TEA013031.1
TEA010299.1	TEA013324.1
TEA010299.1	TEA014506.1
TEA010299.1	TEA017713.1
TEA010299.1	TEA017723.1
TEA010299.1	TEA018439.1
TEA010299.1	TEA018760.1
TEA010299.1	TEA019044.1
TEA010299.1	TEA023997.1
TEA010299.1	TEA025203.1
TEA010299.1	TEA025845.1
TEA010299.1	TEA025875.1
TEA010299.1	TEA026130.1
TEA010299.1	TEA027331.1
TEA010299.1	TEA028075.1
TEA010299.1	TEA028907.1
TEA010299.1	TEA029670.1
TEA010299.1	TEA029714.1
TEA010299.1	TEA030314.1
TEA010299.1	TEA030862.1
TEA010299.1	TEA032070.1
TEA010299.1	TEA032182.1
TEA010729.1	TEA031434.1
TEA010738.1	TEA011501.1
TEA010738.1	TEA015970.1
TEA010738.1	TEA029285.1
TEA010854.1	TEA015241.1
TEA011206.1	TEA014228.1
TEA011206.1	TEA018911.1
TEA011206.1	TEA024795.1
TEA011239.1	TEA024795.1
TEA011239.1	TEA032547.1
TEA011367.1	TEA013909.1
TEA011501.1	TEA016725.1
TEA011501.1	TEA031434.1
TEA011836.1	TEA028449.1
TEA011860.1	TEA029670.1
TEA011960.1	TEA028449.1
TEA012385.1	TEA014228.1
TEA012385.1	TEA024696.1
TEA012385.1	TEA024795.1
TEA012385.1	TEA026508.1
TEA012385.1	TEA027740.1
TEA012385.1	TEA028352.1
TEA012385.1	TEA030790.1
TEA012385.1	TEA031238.1
TEA012385.1	TEA032547.1
TEA012588.1	TEA013031.1
TEA012588.1	TEA026130.1
TEA012588.1	TEA028075.1
TEA012588.1	TEA028907.1
TEA012588.1	TEA029714.1
TEA012865.1	TEA024795.1
TEA013031.1	TEA013303.1
TEA013031.1	TEA014228.1
TEA013031.1	TEA015861.1
TEA013031.1	TEA024795.1
TEA013031.1	TEA028449.1
TEA013031.1	TEA032547.1
TEA013031.1	TEA033522.1
TEA013124.1	TEA014228.1
TEA013124.1	TEA024795.1
TEA013184.1	TEA031434.1
TEA013731.1	TEA015241.1
TEA013731.1	TEA016295.1
TEA013731.1	TEA027212.1
TEA013909.1	TEA031434.1
TEA014041.1	TEA014228.1
TEA014041.1	TEA024795.1
TEA014139.1	TEA014228.1
TEA014139.1	TEA018911.1
TEA014139.1	TEA027740.1
TEA014228.1	TEA014506.1
TEA014228.1	TEA014518.1
TEA014228.1	TEA017713.1
TEA014228.1	TEA017723.1
TEA014228.1	TEA019044.1
TEA014228.1	TEA020169.1
TEA014228.1	TEA020221.1
TEA014228.1	TEA026130.1
TEA014228.1	TEA028050.1
TEA014228.1	TEA028075.1
TEA014228.1	TEA028388.1
TEA014228.1	TEA028907.1
TEA014228.1	TEA029314.1
TEA014228.1	TEA029670.1
TEA014228.1	TEA030246.1
TEA014228.1	TEA030346.1
TEA014228.1	TEA030349.1
TEA014228.1	TEA032182.1
TEA014495.1	TEA031434.1
TEA014506.1	TEA024795.1
TEA014506.1	TEA028449.1
TEA014518.1	TEA018911.1
TEA015009.1	TEA031434.1
TEA015144.1	TEA031434.1
TEA015241.1	TEA021676.1
TEA015241.1	TEA022191.1
TEA015241.1	TEA022777.1
TEA015241.1	TEA025155.1
TEA015241.1	TEA027314.1
TEA015241.1	TEA027319.1
TEA015241.1	TEA029393.1
TEA015241.1	TEA030078.1
TEA015241.1	TEA031004.1
TEA015241.1	TEA033527.1
TEA015253.1	TEA031434.1
TEA015732.1	TEA031434.1
TEA015791.1	TEA024795.1
TEA015861.1	TEA026130.1
TEA015861.1	TEA028075.1
TEA015861.1	TEA028907.1
TEA015970.1	TEA016725.1
TEA015970.1	TEA031434.1
TEA016017.1	TEA031434.1
TEA016295.1	TEA021676.1
TEA016295.1	TEA022191.1
TEA016295.1	TEA022777.1
TEA016295.1	TEA030078.1
TEA016295.1	TEA030190.1
TEA016380.1	TEA027212.1
TEA016574.1	TEA031434.1
TEA016725.1	TEA020334.1
TEA016725.1	TEA025215.1
TEA016725.1	TEA027136.1
TEA016725.1	TEA027487.1
TEA016725.1	TEA029285.1
TEA016785.1	TEA031434.1
TEA017244.1	TEA024991.1
TEA017333.1	TEA024795.1
TEA017713.1	TEA024795.1
TEA017723.1	TEA024795.1
TEA017723.1	TEA028449.1
TEA017759.1	TEA029670.1
TEA017882.1	TEA026508.1
TEA017925.1	TEA026508.1
TEA017995.1	TEA024795.1
TEA017995.1	TEA032547.1
TEA018439.1	TEA028449.1
TEA018479.1	TEA024696.1
TEA018479.1	TEA024795.1
TEA018479.1	TEA026508.1
TEA018479.1	TEA028352.1
TEA018479.1	TEA030790.1
TEA018479.1	TEA032547.1
TEA018760.1	TEA028449.1
TEA018911.1	TEA020221.1
TEA018911.1	TEA028388.1
TEA018911.1	TEA029670.1
TEA018911.1	TEA030246.1
TEA018911.1	TEA030349.1
TEA019044.1	TEA024795.1
TEA019044.1	TEA032547.1
TEA019366.1	TEA031434.1
TEA019577.1	TEA024696.1
TEA019639.1	TEA031434.1
TEA019960.1	TEA027212.1
TEA020169.1	TEA024795.1
TEA020169.1	TEA032547.1
TEA020219.1	TEA024795.1
TEA020221.1	TEA024795.1
TEA020221.1	TEA027740.1
TEA020759.1	TEA024795.1
TEA020759.1	TEA032547.1
TEA020933.1	TEA031434.1
TEA021049.1	TEA026508.1
TEA021676.1	TEA027212.1
TEA022654.1	TEA029670.1
TEA022776.1	TEA024696.1
TEA022776.1	TEA026508.1
TEA022777.1	TEA027212.1
TEA023997.1	TEA028449.1
TEA024696.1	TEA025596.1
TEA024696.1	TEA026093.1
TEA024795.1	TEA025845.1
TEA024795.1	TEA027513.1
TEA024795.1	TEA028050.1
TEA024795.1	TEA028388.1
TEA024795.1	TEA029098.1
TEA024795.1	TEA029314.1
TEA024795.1	TEA029670.1
TEA024795.1	TEA032878.1
TEA024873.1	TEA031434.1
TEA025203.1	TEA028449.1
TEA025596.1	TEA026508.1
TEA025845.1	TEA028449.1
TEA025875.1	TEA028449.1
TEA026130.1	TEA028449.1
TEA026130.1	TEA033198.1
TEA026130.1	TEA033522.1
TEA026508.1	TEA028234.1
TEA026508.1	TEA029197.1
TEA026508.1	TEA029670.1
TEA026508.1	TEA030346.1
TEA026953.1	TEA028449.1
TEA027212.1	TEA030078.1
TEA027212.1	TEA033527.1
TEA027331.1	TEA028449.1
TEA027740.1	TEA028234.1
TEA027740.1	TEA029670.1
TEA027740.1	TEA030346.1
TEA027740.1	TEA030349.1
TEA028050.1	TEA032547.1
TEA028075.1	TEA028449.1
TEA028075.1	TEA033198.1
TEA028075.1	TEA033522.1
TEA028449.1	TEA028907.1
TEA028449.1	TEA029714.1
TEA028449.1	TEA030314.1
TEA028449.1	TEA030862.1
TEA028449.1	TEA032070.1
TEA028449.1	TEA032182.1
TEA028907.1	TEA033522.1
TEA029285.1	TEA031434.1
TEA029670.1	TEA031238.1
TEA031434.1	TEA031627.1

## Sheet: Table S10
Table S10. miRNA-target pairs related to AAPs in the network
target	annotation	miRNA
TEA000234.1		PC-3p-78787_57
TEA000659.1		mtr-miR393a_R+1
TEA000705.1	HB-HD-ZIP	mtr-miR166a_1ss21CT	mtr-miR166a_L+1R-1
TEA000953.1	GRF	vvi-miR396a_1ss20TC	mtr-miR396b-5p	mtr-miR396a-5p
TEA001390.1		csi-MIR858-p5_1ss4TG
TEA001647.1		mtr-miR396a-5p_L-1R+1
TEA001672.1		PC-3p-19789_284
TEA001714.1		mtr-miR171c_2ss13GT21TC
TEA001719.1		mtr-miR171c_2ss13GT21TC
TEA001755.1	SBP	ptc-miR156a_R+1
TEA001894.1	GRF	vvi-miR396a_1ss20TC	mtr-miR396b-5p	mtr-miR396a-5p
TEA002141.1		mtr-miR2111a-5p_R-1
TEA002585.1		gma-miR167e
TEA003128.1		stu-MIR8005c-p3_1ss11AG
TEA004376.1		csi-MIR858-p5_1ss4TG
TEA004492.1	SBP	ptc-miR156a_R+1
TEA004692.1	HB-HD-ZIP	mtr-miR166a_1ss21CT	mtr-miR166a_L+1R-1
TEA004965.1		PC-3p-19789_284
TEA005520.1		stu-MIR8005c-p3_1ss11AG
TEA006319.1		PC-3p-6132_801
TEA006584.1	SBP	ptc-miR156a_R+1
TEA007610.1		ptc-miR403a
TEA008208.1		PC-5p-11999_450
TEA008271.1	HB-HD-ZIP	mtr-miR166a_1ss21CT	mtr-miR166a_L+1R-1
TEA008702.1		mdm-miR535a	ptc-miR156a_R+1
TEA008888.1	SBP	ptc-miR156a_R+1
TEA009053.1	NF-YA	ptc-miR169i_R+1	mdm-miR169b
TEA009565.1		mtr-miR168b_R-1
TEA010299.1		mdm-miR319b-5p_L+1
TEA010738.1		PC-3p-24596_231
TEA010779.1		mes-MIR477f-p5_1ss1CT_2	mes-MIR477f-p5_1ss1CT_1
TEA011325.1		mtr-miR164a	mtr-miR164a_1ss21AG
TEA011367.1		mtr-miR319a-5p_2ss13AT21CT
TEA011860.1		mtr-MIR2603-p3_2ss9AC17AC
TEA012588.1		mtr-miR167a_L-1R+1
TEA013303.1		mtr-miR2111a-5p_1ss21AG	mtr-miR2111a-5p_R-1
TEA013558.1	GRAS	mtr-miR171d_R+1	mtr-miR171c_2ss13GT21TC	gma-miR171m_1ss21AT	stu-miR171d-3p_R-1_1ss19AG
TEA014197.1		PC-3p-71291_66
TEA014228.1	GRF	vvi-miR396a_1ss20TC	mtr-miR396b-5p	mtr-miR396a-5p
TEA014492.1		PC-3p-19789_284
TEA014596.1		csi-MIR858-p5_1ss4TG
TEA015861.1	GRF	mtr-miR396b-5p	mtr-miR396a-5p
TEA015967.1		mtr-miR159a_1ss20TC	mtr-miR159a
TEA016012.1		gra-miR167a_L-2R+2
TEA016229.1		PC-5p-54800_95
TEA016725.1		nta-MIR172e-p3_2ss15CG19TA
TEA016788.1		mes-MIR477f-p5_1ss1CT_2	mes-MIR477f-p5_1ss1CT_1
TEA017479.1		gma-miR166m_L+1_1ss3GT
TEA017759.1		PC-3p-42917_129
TEA018911.1	GRF	vvi-miR396a_1ss20TC	mtr-miR396b-5p	mtr-miR396a-5p
TEA019477.1		PC-3p-6132_801
TEA021257.1		gma-MIR5368-p5_2ss16TC19CT
TEA021360.1		mtr-miR159a_1ss20TC	mtr-miR159a
TEA022654.1	GRF	vvi-miR396a_1ss20TC	mtr-miR396b-5p	mtr-miR396a-5p
TEA023390.1		gma-miR395a_1ss19CT
TEA023526.1		ppe-MIR169b-p3_2ss10TA21TC
TEA023550.1	NF-YA	mdm-miR169b
TEA023795.1	SBP	ptc-miR156a_R+1
TEA024504.1		PC-3p-15743_350
TEA024795.1	C2C2-GATA	mtr-miR398b
TEA024991.1		mtr-miR172c-5p
TEA025970.1		csi-MIR858-p5_1ss4TG
TEA027740.1	GRF	vvi-miR396a_1ss20TC	mtr-miR396b-5p	mtr-miR396a-5p	gra-MIR8757b-p5_1ss17GC
TEA028449.1		tcc-MIR403a-p5_1ss20TC
TEA029437.1	GRAS	mtr-miR171d_R+1	mtr-miR171c_2ss13GT21TC	gma-miR171m_1ss21AT	stu-miR171d-3p_R-1_1ss19AG
TEA029643.1	B3-ARF	gma-miR167k_R-3_1ss9CT
TEA031027.1	HB-HD-ZIP	mtr-miR166a_1ss21CT	mtr-miR166a_L+1R-1
TEA031434.1		PC-3p-15743_350
TEA031479.1		ppe-MIR169b-p3_2ss10TA21TC
TEA031554.1		gma-miR167k_R-3_1ss9CT
TEA032547.1		nta-MIR6149a-p5_2ss18CT21TA
TEA033198.1	bHLH	mtr-miR393a_R+1
TEA033522.1	GRF	vvi-miR396a_1ss20TC	mtr-miR396b-5p	mtr-miR396a-5p
